# Supplementary material for: Visiblelight-induced ternary electron donor–acceptor complex enabled synthesis of 2-(2-hydrazinyl) thiazole derivatives and the assessment of their antioxidant and antidiabetic therapeutic potential
Source: Royal Society of Chemistry journal article supplement (doi:10.1039/d2ob02308c), 2023-01-01
Supplement: d2ob02308c1.pdf [file d2ob02308c1.pdf]

## Supporting Information

### Content

|                                                              |       |
|--------------------------------------------------------------|-------|
| 1. General Information                                       | 2-2   |
| 2. General procedure for the synthesis of hydrazinylthiazole | 2-2   |
| 3. Gram scale synthesis of hydrazinylthiazole                | 2-2   |
| 4. Mechanistic studies                                       | 2-9   |
| 5. Theoretical studies                                       | 9-19  |
| 6. Biological studies                                        | 18-19 |
| 7. Spectroscopic data of compounds                           | 19-24 |
| 8. Copies of $^1\text{H}$ and $^{13}\text{C}$ NMR            | 25-54 |
| 9. Crystallographic experimental data                        | 55-59 |

**General information:** All of the solvents and reagents used for the synthesis of hydrazinyl thiazole are purchased from commercial sources and has been used without any purification. Wipro 9W green LED is used as light source with wavelength range 400-700 nm. The distance from the light source to the reaction vessel is ~6-8 cm. Reaction has been performed in the oven dried borosilicate glasswares. Silica gel with mesh size 100-200 has been used for column chromatography. NMR has been recorded at 400/300 MHz for  $^1\text{H}$  and for  $^{13}\text{C}$  100/75 MHz operating frequency in DMSO-*d*<sub>6</sub>, CDCl<sub>3</sub>, where Tetramethylsilane(TMS) present as an internal standard. Chemical shift ( $\delta$ ) value reported in the NMR spectra in ppm. Coupling constant (J) value were given in Hertz (Hz). The term m, q, t, d, s referred to multiplet, quartet, triplet, doublet, singlet respectively. Exact mass (HRMS) were recorded on a high resolution mass spectrometer using electrospray ionization (ESI) techniques.

**General procedure for the synthesis of hydrazinylthiazole:** A mixture of carbonyl compound (1 mmol), thiosemicarbazide (1 mmol), phenacyl bromide (1 mmol) in ethanol : water mixture (1:2, 5 mL) stirred for 60 minutes under 9W green LED irradiation at room temperature. Progress of the reaction was monitored by the thin layer chromatography (TLC). After completion of the reaction, the reaction mixture was worked up with water and extracted with ethyl acetate, thrice. Then the organic portion dried over anhydrous Na<sub>2</sub>SO<sub>4</sub> and evaporated and the pure product was separated by column chromatography. Formation of the product confirmed by  $^1\text{H}$  and,  $^{13}\text{C}$  NMR techniques.

**Gram Scale Synthesis of hydrazinylthiazole:** A mixture of *p*-dimethylaminobenzaldehyde (**1a**, 6.71 mmol), thiosemicarbazide (**2**, 6.71 mmol), *p*-nitrophenacyl bromide (**3a**, 6.71 mmol) in ethanol: water mixture (1:2, 10 mL) stirred for 90 minutes under 9W green LED irradiation at room temperature. Progress of the reaction was monitored by the thin layer chromatography (TLC). After completion of the reaction, the reaction mixture was worked up with water and extracted with ethyl acetate, thrice. Then the organic portion dried over anhydrous Na<sub>2</sub>SO<sub>4</sub> and evaporated and the pure product was separated by column chromatography. The isolated yield of the desired product **4a** was found to be 87%.

### **Mechanistic Study:**

(a) **UV-Vis experiment:** The UV-visible experiments were performed on Shimadzu UV-1900i spectrophotometer with a quartz cuvette of 1.0 cm path length. At first, all the reacting components, i.e., *p*-dimethylaminobenzaldehyde (**1a**), thiosemicarbazide (**2**), *p*-nitrophenacyl bromide (**3a**) were examined individually for their UV-Vis spectrum at concentration of  $5 \times 10^{-4}$  M in ethanol. From the absorption plot it was found that except thiosemicarbazide (**2**), rest of the components poorly absorbed in the visible region. After that binary mixtures of the reacting components (i.e., **1a+2**, **2+3a**, and **1a+3a**) were examined at the same concentration as previous. This time it was observed that mixture of **1a+2** and **2+3a** showed a bathochromic shift with respect to their individual components. Finally, when the mixture of all the components (**1a+2+3a**) was investigated, further bathochromic shift was observed, with a hump around 600 nm. The bathochromic shifts in binary mixture and further bathochromic shift along with a shoulder in case of

all three components suggests the formation of ternary EDA complex formation between **1a**, **2**, and **3a**. This assumption is further supported by appearance of yellow coloration immediate after mixing all the components.

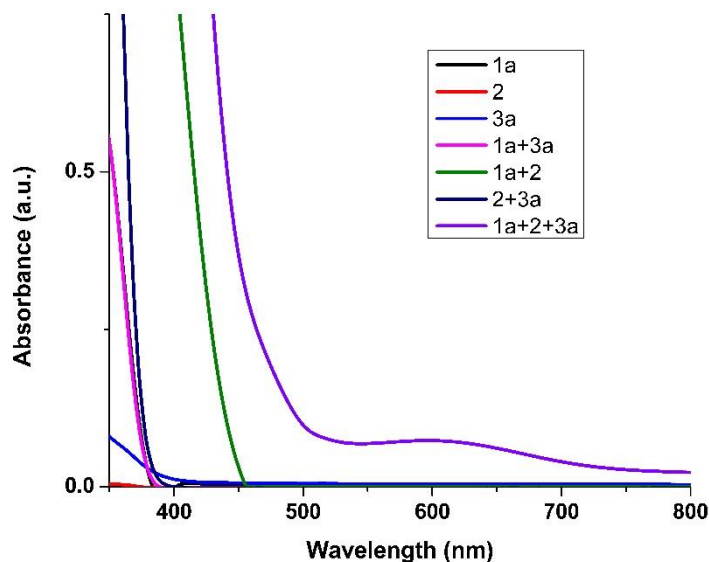

**Figure S1:** UV-Visible absorption spectra of different reacting components and their mixtures.

**(b) Stoichiometry of the EDA complex in solution:** To determine the stoichiometry of the ternary EDA complex formed between **1a**, **2**, and **3a** a Job's plot was constructed.<sup>1</sup> For this purpose, we measured the absorption at 450 nm of ethanol solution of **1a-3a** (1:1) and **2** having a constant total concentration of 0.02 M, but different donor/acceptor ratios. All the absorption spectra were recorded in 1 cm path quartz cuvettes using Hitachi U2910 UV-Vis spectrophotometer. The difference in absorbance values are plotted against mole fraction of **2**. The maximum absorbance was detected at 50% mole fraction of **2** suggesting 1:1 mixture of (**1a-3a**) and **2**, indicating that this is the stoichiometry of the ternary EDA complex.

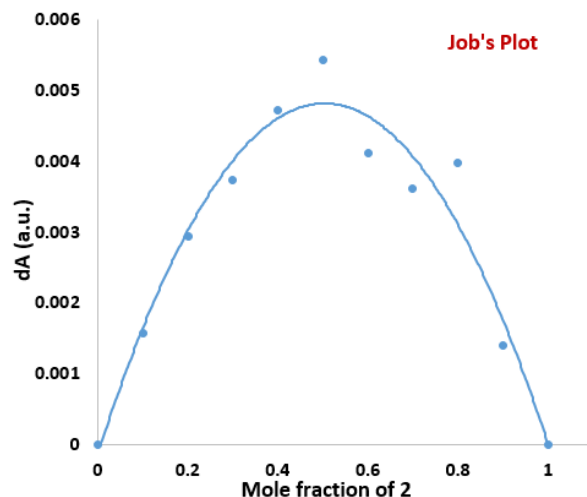

**Figure S2:** Job's plot for interaction between **1a-3a** and **2**.

**(c) Determination of the association constant ( $K_{EDA}$ ):** The association constant of the ternary EDA complex formed between **1a**, **2**, and **3a** was determined spectrophotometrically in ethanol, employing the Benesi-Hildebrand methodology.<sup>2</sup> We measured the absorption at 450 nm of solutions with constant concentration of 0.02 M of **1a-3a** (1:1) but increased donor/acceptor ratios, adding an excess of **2**. All the absorption spectra were recorded in 1 cm path quartz cuvettes using a Hitachi U2910 UV-Vis spectrophotometer. According to the methodology a straightline is obtained by plotting reciprocal of the absorbance against the reciprocal of concentration of **2**. The association constant ( $K_{EDA}$ ) is obtained by dividing the intercept by slope and found to be  $K_{EDA} = 1.03 \text{ M}^{-1}$ .

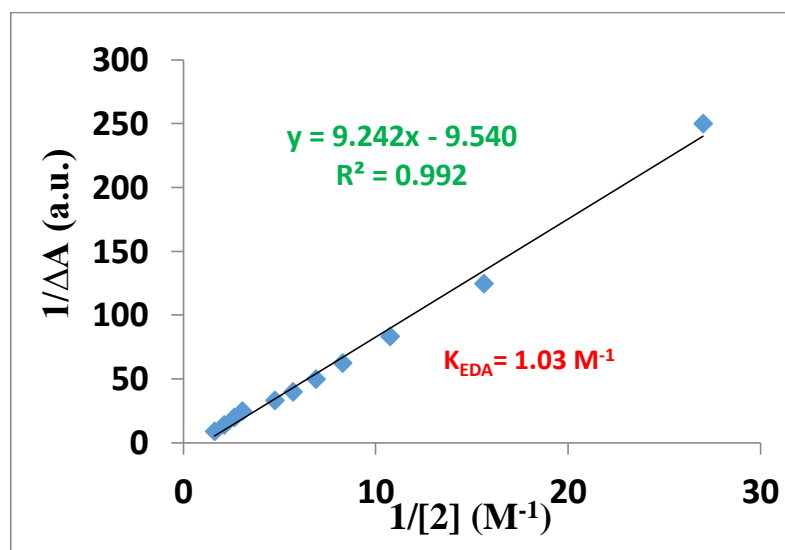

**Figure S3:** Plot for determination of association constant of the EDA complex ( $K_{EDA}$ )

**(d) Radical trapping experiment with TEMPO:** To a mixture of p-dimethylaminobenzaldehyde (**1a**, 1 mmol), thiosemicarbazide (**2**, 1 mmol) and phenacylbromide (**3a**, 1 mmol) in ethanol:water mixture (1:2, 5mL), TEMPO (2eq) was

added and stirred the mixture for 60 minutes under 9W green LED irradiation. The progress of the reaction was monitored by TLC and with completion of the reaction, the mixture was worked up with water and then extracted with ethyl acetate, dried over anhydrous  $\text{Na}_2\text{SO}_4$  and evaporated under reduced pressure. The desired product was found in traces along with TEMPO adducts in HRMS. The aldehyde(**1a**)-TEMPO adduct was found as  $[\text{M}-\text{OH}]^+$  at  $m/z$  289.2280, the thiosemicarbazide(**2**)-TEMPO adduct was found as  $[\text{M}]^+$   $m/z$  246.1514, and the phenacyl(**3a**)-TEMPO adduct was found as  $[\text{M}+\text{H}]^+$  at  $m/z$  321.1814. All these adducts not only suggest the radical mechanism for the desired product hydrazinylthiazole but also supports the EDA complex formed between **1a**, **2**, and **3a**.

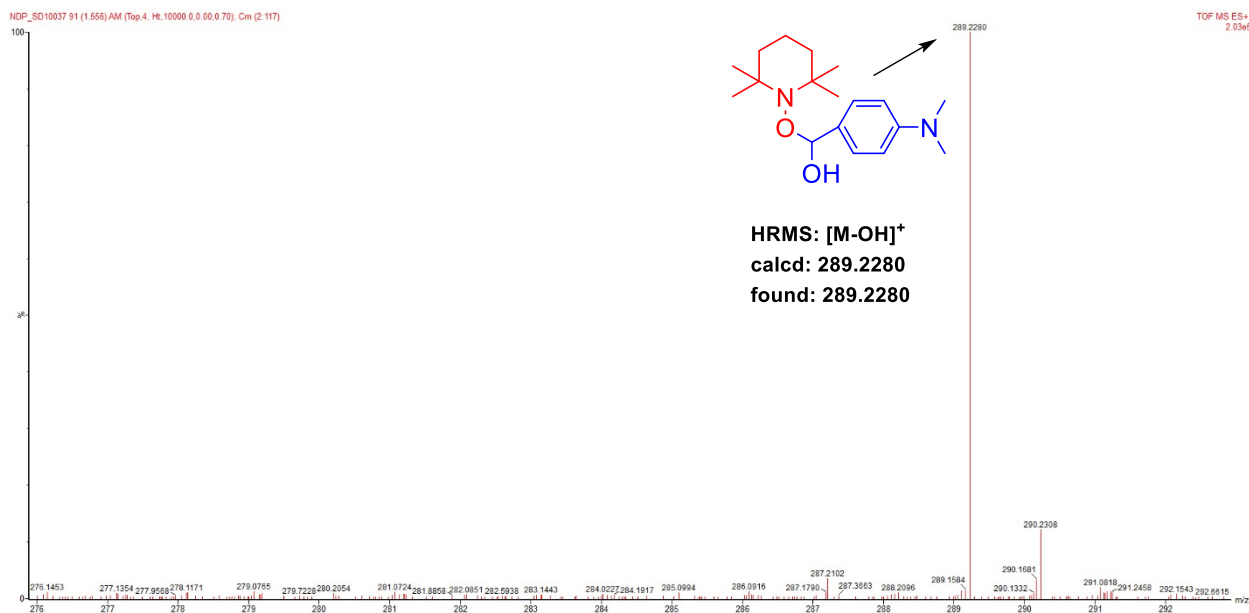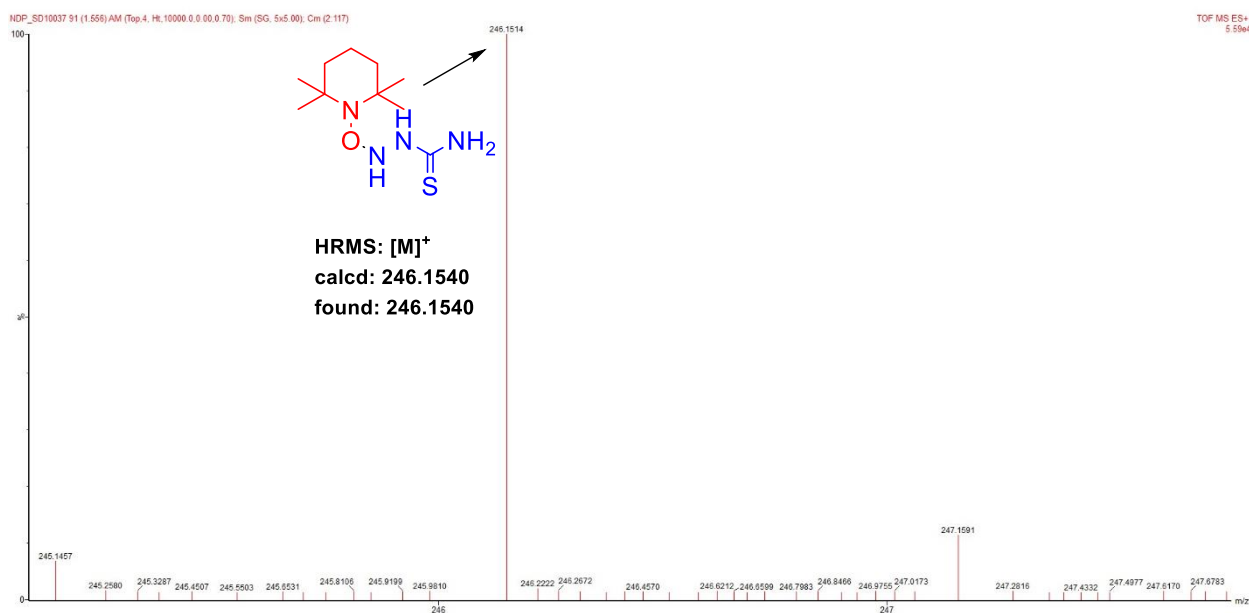

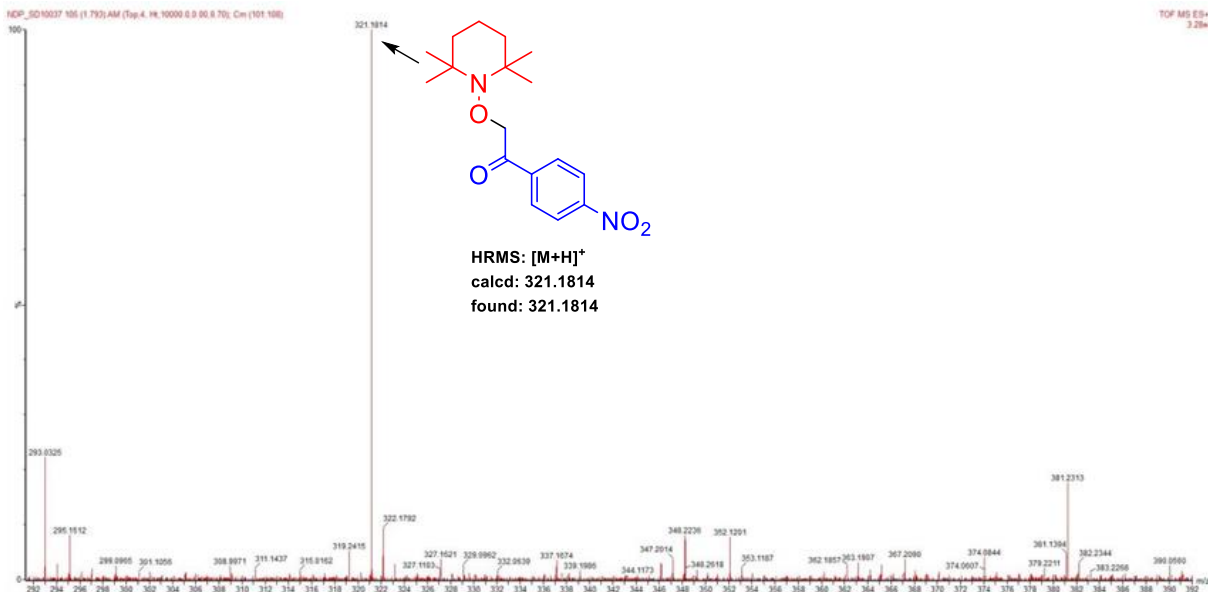

**Figure S4:** HRMS spectra of TEMPO-adducts of **1a**, **2**, and **3a**.

(e) **Quenching experiment with Hydroquinone:** To a mixture of *p*-dimethylaminobenzaldehyde (**1a**, 1 mmol), thiosemicarbazide (**2**, 1 mmol) and *p*-nitrophenacyl bromide (**3a**, 1 mmol) in ethanol:water mixture (1:2, 5mL), Hydroquinone (2eq) was added and stirred the mixture for 60 minutes under 9W green LED irradiation. The progress of the reaction was monitored by TLC and with completion of the reaction, the mixture was worked up with water and then extracted with ethyl acetate, dried over anhydrous Na<sub>2</sub>SO<sub>4</sub> and evaporated under reduced pressure. The desired product was not detected.

(f) **Cyclic voltammetry measurements:** The cyclic voltammetry (CV) measurements were carried out on a PGLyte electrochemical workstation by a standard three-electrode system (working electrode: glassy carbon electrode; counter electrode: Pt, reference electrode: Ag/AgCl electrode) using tetrapropylammonium perchlorate (0.02 M) as the electrolyte in ethanol at 50 mV/s scan rate at room temperature. The concentration of **1a**, **2**, and **3a** were kept constant throughout the study at 0.01 M. The voltammograms are shown in figure S5. From the voltammograms it can be found that **1a** and **3a** showed irreversible reduction while **2** showed two irreversible oxidation. The reduction potential of **1a** is  $(E_{red})^{1a} = -1.35$  V vs Ag/AgCl, oxidation potential of **2** is  $(E_{ox}^1)^2 = +1.23$  V vs Ag/AgCl and  $+1.48$  V vs Ag/AgCl, and the reduction potential of **3a** is  $(E_{red})^{3a} = -1.40$  V vs Ag/AgCl. All these cyclic voltammograms support for ternary EDA complex formation between **1a**, **2**, and **3a** and the successive electron transfer from **2** to both **1a** and **3a**.

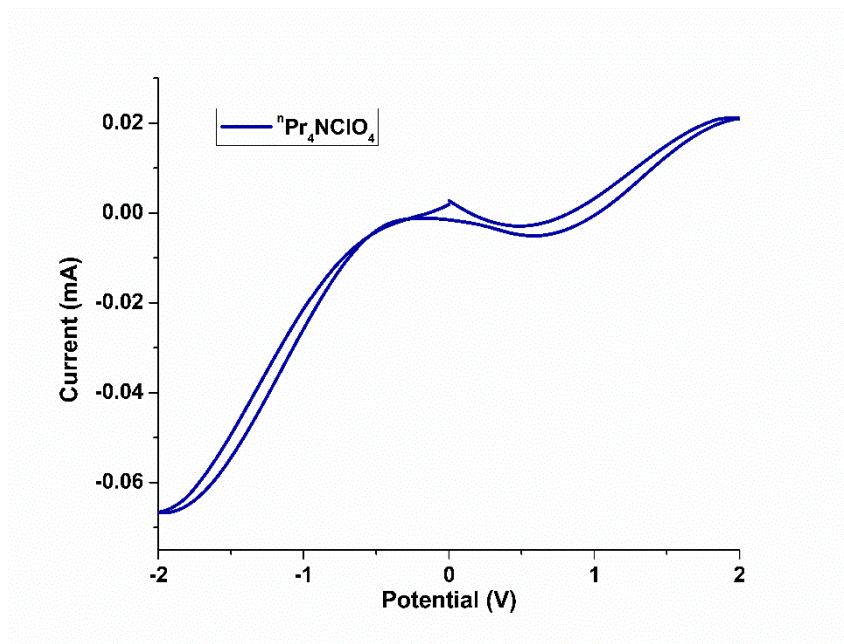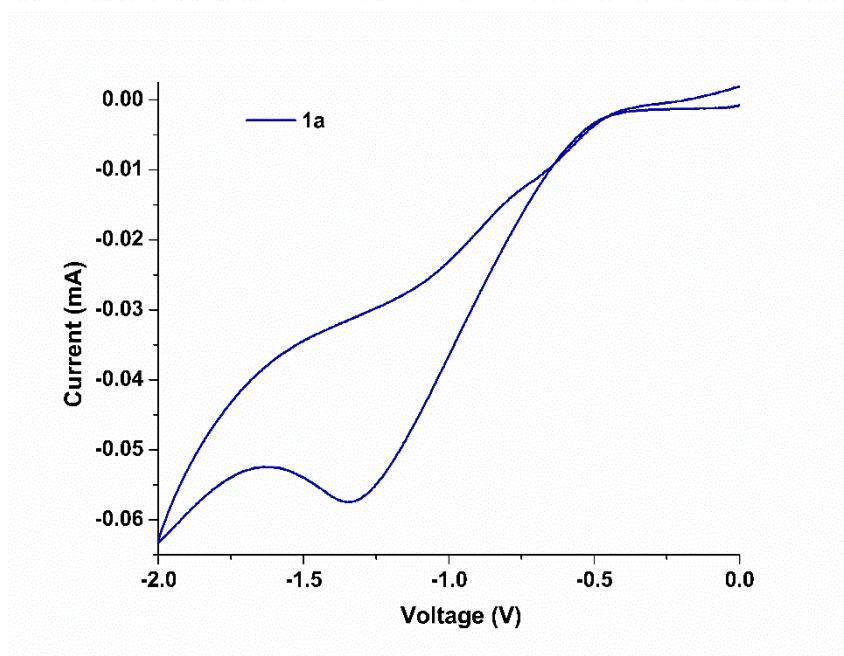



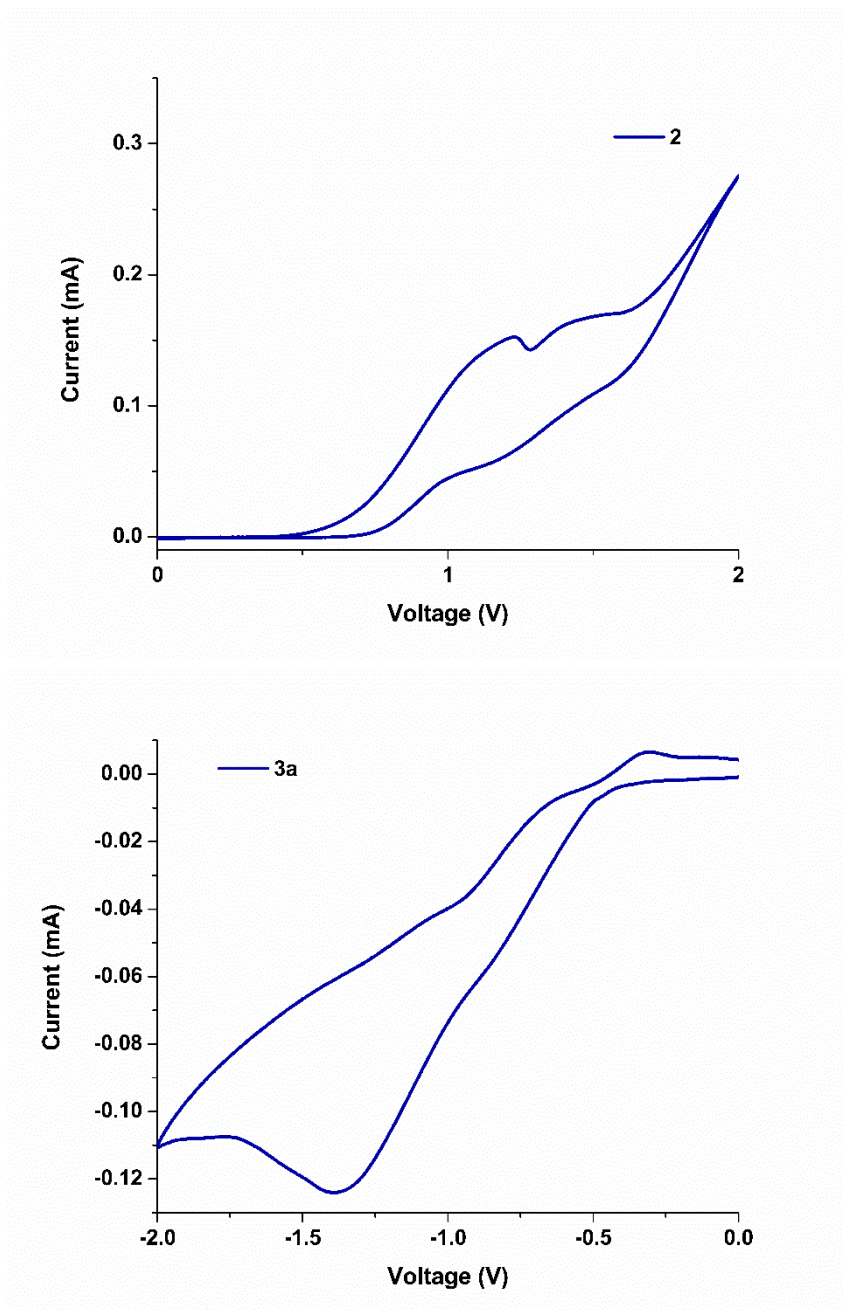

**Figure S5:** Cyclic voltammograms of  $\text{pPr}_4\text{NClO}_4$  (electrolyte), **1a**, **2**, and **3a** respectively from top.

**(g) Light On-Off experiment:** A mixture of *p*-dimethylaminobenzaldehyde (**1a**, 1 mmol), thiosemicarbazide (**2**, 1 mmol), *p*-nitrophenacyl bromide (**3a**, 1 mmol) in ethanol : water mixture (1:2, 5 mL) stirred for 60 minutes under 9W green LED irradiation with a time interval of 10 minutes at room temperature. After every 10 minute interval a aliquot was taken out from the reaction mixture and worked up with water and extracted with ethyl acetate. Then the organic portion dried over anhydrous  $\text{Na}_2\text{SO}_4$  and the solvent was removed. The yield of the product was obtained using  $^1\text{H}$  NMR of the crude product in



each interval where 1,3,5-trimethoxybenzene was used as internal standard. The yield of the desired product at different time interval was shown in the figure.

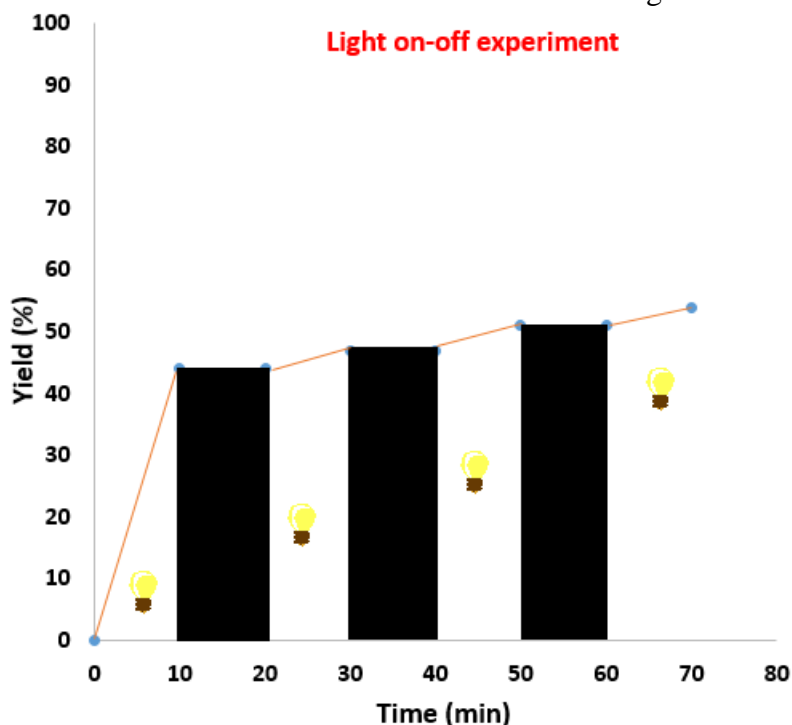

Figure S6: Light on-off experiment

### Theoretical Studies:

TD-DFT (Time-Dependent Density Functional Theory) calculations were performed for all three individual molecules, their binary compositions, and all three molecules together to reproduce the UV-Visible spectrum. From the theoretical calculations, it was observed that for single molecules: **1a**, **2**, and **3a**, there was no appreciable absorbance in the visible region, as observed from the experimental results. An absorbance of a higher wavelength was observed for the binary compositions: **1a+2** and **2+3a**. However, there was no such absorption observed for **1a+3a** at a higher wavelength. On the other hand, the mixture of all the components (i.e., **1a+2+3a**) showed an absorbance of further higher wavelength as to binary mixtures in the range of 600 nm. The results can be elucidated using the given TD-DFT-based UV-Visible spectra (Figure S7).

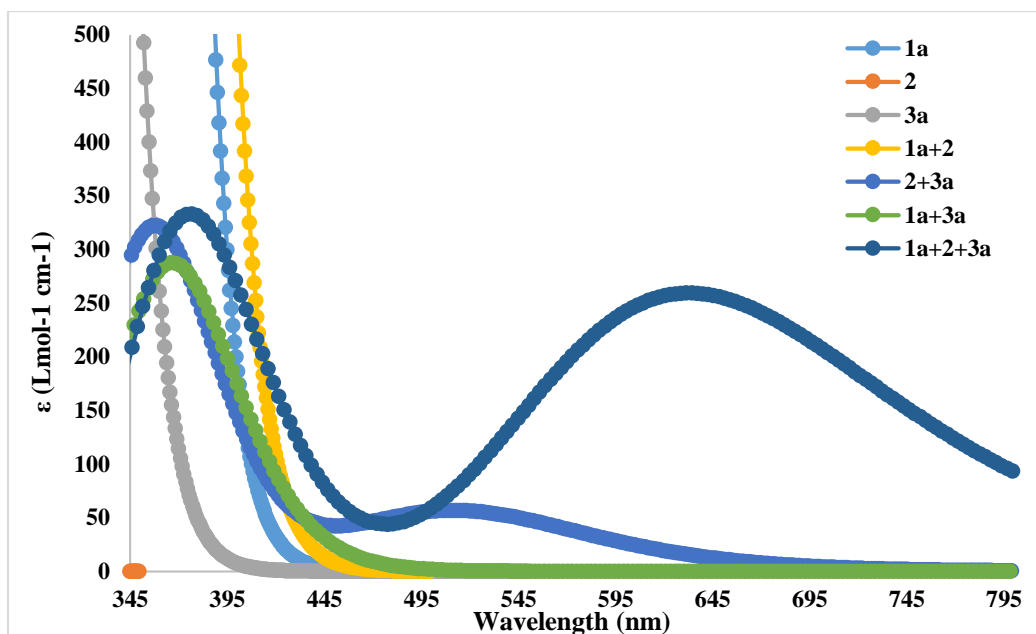

**Figure S7:** Theoretical UV-Visible Absorption spectrum for the system **1a**, **2**, **3a**, **1a+2**, **2+3a**, **1a+3a** and **1a+2+3a**

### Co-ordinates of the reactant molecules

#### Compound 1a

22

|   |             |             |             |
|---|-------------|-------------|-------------|
| C | -0.99476200 | -0.01554100 | -0.00004100 |
| C | -0.17008400 | 1.14675000  | -0.00004300 |
| C | 1.20382200  | 1.04061100  | -0.00002400 |
| C | 1.84280500  | -0.21309600 | -0.00002800 |
| C | 1.03580500  | -1.36256500 | -0.00005000 |
| C | -0.34345300 | -1.27907600 | -0.00006400 |
| H | -0.61780100 | 2.13129900  | -0.00006600 |
| H | 1.81465000  | 1.93739300  | -0.00002200 |
| H | 1.50411000  | -2.34328400 | -0.00008400 |
| H | -0.92313100 | -2.19208300 | -0.00010500 |
| N | -2.35570800 | 0.08299200  | 0.00001100  |
| C | -3.18096400 | -1.11902200 | 0.00008300  |
| H | -2.99857800 | -1.73412900 | 0.88727800  |
| H | -4.22957900 | -0.83289900 | 0.00003000  |

|   |             |             |             |
|---|-------------|-------------|-------------|
| H | -2.99852100 | -1.73425300 | -0.88701300 |
| C | -3.00284500 | 1.38986800  | 0.00000800  |
| H | -2.73637500 | 1.97368800  | -0.88706800 |
| H | -4.08125500 | 1.25370000  | -0.00015200 |
| H | -2.73661000 | 1.97360800  | 0.88721000  |
| C | 3.29516000  | -0.32947200 | 0.00004500  |
| H | 3.67381400  | -1.37348100 | 0.00008000  |
| O | 4.08829100  | 0.60109400  | 0.00006400  |

Number of imaginary frequencies=0

### Compound 2

10

|   |             |             |             |
|---|-------------|-------------|-------------|
| N | 2.19661600  | -0.26608700 | -0.00002300 |
| H | 2.66842200  | -0.62690200 | -0.82337500 |
| H | 2.66838400  | -0.62692100 | 0.82334800  |
| N | 0.86278500  | -0.70118200 | -0.00002600 |
| H | 0.63271500  | -1.68500200 | 0.00024400  |
| C | -0.15111600 | 0.18785300  | 0.00002400  |
| N | 0.18690900  | 1.47908100  | 0.00007800  |
| H | 1.16516000  | 1.73279500  | -0.00011800 |
| H | -0.52749000 | 2.18536100  | -0.00021800 |
| S | -1.77654100 | -0.35557100 | -0.00001400 |

Number of imaginary frequencies=0

### Compound 3a

19

|   |             |             |             |
|---|-------------|-------------|-------------|
| C | -0.81613400 | -1.00095800 | -0.00031900 |
| C | -2.19475300 | -1.17755700 | -0.00024600 |
| C | -3.01013000 | -0.05212800 | 0.00001300  |
| C | -2.49364500 | 1.24073500  | 0.00023700  |
| C | -1.11681000 | 1.40218000  | 0.00020700  |

|    |             |             |             |
|----|-------------|-------------|-------------|
| C  | -0.26567300 | 0.28791700  | -0.00008600 |
| H  | -0.18664200 | -1.88153500 | -0.00056000 |
| H  | -2.63239300 | -2.16585500 | -0.00040100 |
| H  | -3.16002400 | 2.09192600  | 0.00043800  |
| H  | -0.68305800 | 2.39381800  | 0.00040100  |
| N  | -4.47666000 | -0.23468900 | 0.00004700  |
| O  | -4.91150900 | -1.37930300 | 0.00059700  |
| O  | -5.17770200 | 0.76913600  | -0.00043800 |
| C  | 1.21717300  | 0.54747100  | -0.00016200 |
| C  | 2.12138600  | -0.67912600 | -0.00021900 |
| H  | 1.94590000  | -1.29054900 | 0.88333000  |
| H  | 1.94614200  | -1.29022400 | -0.88403800 |
| O  | 1.64937500  | 1.67798400  | -0.00011900 |
| Br | 4.02791200  | -0.23338600 | 0.00010400  |

Number of imaginary frequencies=0

### **1a+2**

32

|   |             |             |             |
|---|-------------|-------------|-------------|
| N | -3.79342800 | 0.58570600  | 1.88843700  |
| H | -4.15401700 | 1.53518100  | 1.87146600  |
| H | -3.00898300 | 0.56214900  | 2.53274600  |
| N | -3.33353300 | 0.24943000  | 0.59996400  |
| H | -2.62317600 | 0.82604100  | 0.15070500  |
| C | -3.88438400 | -0.78475100 | -0.05915100 |
| N | -4.84352800 | -1.46510700 | 0.57609300  |
| H | -5.11425400 | -1.17901800 | 1.50664500  |
| H | -5.28058500 | -2.25215000 | 0.13055500  |
| S | -3.35627500 | -1.19113900 | -1.64251700 |
| C | 3.08167900  | -0.20361100 | 0.06539800  |
| C | 1.73883400  | -0.65371000 | 0.23238600  |

|   |             |             |             |
|---|-------------|-------------|-------------|
| C | 0.67807000  | 0.21429300  | 0.10223100  |
| C | 0.87720700  | 1.57625500  | -0.20067800 |
| C | 2.20020800  | 2.02536000  | -0.36660500 |
| C | 3.27699700  | 1.17187100  | -0.23990700 |
| H | 1.53835600  | -1.69079800 | 0.46447100  |
| H | -0.33212000 | -0.15785500 | 0.23354100  |
| H | 2.38158700  | 3.07071700  | -0.60093000 |
| H | 4.27507900  | 1.56453400  | -0.37717000 |
| N | 4.13397200  | -1.05869400 | 0.19319100  |
| C | 5.50031000  | -0.57843900 | 0.01658000  |
| H | 5.74967400  | 0.20206900  | 0.74228600  |
| H | 6.19075100  | -1.40508500 | 0.16191300  |
| H | 5.65992400  | -0.17692000 | -0.98922500 |
| C | 3.91161000  | -2.46800000 | 0.50039500  |
| H | 3.31440200  | -2.96029500 | -0.27349600 |
| H | 4.87097300  | -2.97535600 | 0.55747500  |
| H | 3.40353800  | -2.59625200 | 1.46128500  |
| C | -0.22144600 | 2.51119800  | -0.34159200 |
| H | 0.08209300  | 3.54888600  | -0.58206200 |
| O | -1.41896600 | 2.26253000  | -0.22100900 |

Number of imaginary frequencies=0

**2+3a**

29

|   |             |             |             |
|---|-------------|-------------|-------------|
| N | -6.11040700 | -1.76085500 | -1.34144200 |
| H | -6.63333500 | -1.13845100 | -1.94951800 |
| H | -6.68217500 | -2.57782900 | -1.15101800 |
| N | -5.82332200 | -1.10226700 | -0.13638900 |
| H | -6.56196700 | -0.74004500 | 0.45021500  |
| C | -4.54650800 | -0.92288300 | 0.26366000  |
| N | -3.59295200 | -1.40211600 | -0.53238100 |

|    |             |             |             |
|----|-------------|-------------|-------------|
| H  | -3.87036700 | -1.85392100 | -1.39329700 |
| H  | -2.61388700 | -1.28686100 | -0.30395800 |
| S  | -4.22343500 | -0.11058200 | 1.74245800  |
| C  | 2.11782100  | -1.51761700 | -0.27439300 |
| C  | 3.49089200  | -1.69661600 | -0.33558200 |
| C  | 4.31438600  | -0.64827100 | 0.06568600  |
| C  | 3.80773300  | 0.56253700  | 0.52248000  |
| C  | 2.42929100  | 0.72730300  | 0.58178400  |
| C  | 1.57334900  | -0.30876400 | 0.18416100  |
| H  | 1.44995800  | -2.31313600 | -0.57839900 |
| H  | 3.92260500  | -2.62410200 | -0.68472500 |
| H  | 4.47950000  | 1.35388700  | 0.82357600  |
| H  | 2.03979200  | 1.67404500  | 0.93193100  |
| N  | 5.78057500  | -0.82855900 | 0.00413300  |
| O  | 6.48740900  | 0.10801000  | 0.35322900  |
| O  | 6.20762400  | -1.90502000 | -0.39273700 |
| C  | 0.08194200  | -0.19254800 | 0.23790000  |
| C  | -0.56738000 | 1.07214500  | 0.76927900  |
| H  | -1.60554900 | 0.87400900  | 1.02256900  |
| H  | -0.04401800 | 1.52026100  | 1.60831500  |
| O  | -0.62263800 | -1.11717200 | -0.12988300 |
| Br | -0.59631900 | 2.43999400  | -0.66706200 |

Number of imaginary frequencies=0

**1a+3a**

41

|   |             |             |             |
|---|-------------|-------------|-------------|
| C | -4.69949000 | -0.30356400 | -0.02340300 |
| C | -5.35645900 | -1.52414100 | 0.30939100  |
| C | -6.73090700 | -1.61877100 | 0.28449800  |
| C | -7.53596400 | -0.51997000 | -0.06906300 |
| C | -6.89504600 | 0.68564900  | -0.39893100 |

|   |             |             |             |
|---|-------------|-------------|-------------|
| C | -5.51853600 | 0.80267400  | -0.38041500 |
| H | -4.77759300 | -2.39413900 | 0.58844700  |
| H | -7.21265000 | -2.55626900 | 0.54219200  |
| H | -7.49398800 | 1.54916700  | -0.67627800 |
| H | -5.06980200 | 1.75091800  | -0.64311600 |
| N | -3.34003500 | -0.20247500 | 0.00106700  |
| C | -2.68613800 | 1.05765700  | -0.33396400 |
| H | -2.99751200 | 1.86320400  | 0.33943300  |
| H | -1.61017600 | 0.93622300  | -0.24109100 |
| H | -2.90852800 | 1.36720200  | -1.36080900 |
| C | -2.51603300 | -1.35183400 | 0.35959300  |
| H | -2.67462200 | -2.19087300 | -0.32595600 |
| H | -1.46847800 | -1.06769700 | 0.30861300  |
| H | -2.72652800 | -1.69799500 | 1.37704700  |
| C | -8.98903000 | -0.61556900 | -0.09597500 |
| H | -9.50681200 | 0.32202700  | -0.38985800 |
| O | -9.64709000 | -1.61123100 | 0.17081600  |
| C | 4.39311300  | 0.31653700  | 0.73874000  |
| C | 5.55524900  | -0.43047100 | 0.58888900  |
| C | 5.47460800  | -1.66814800 | -0.03821500 |
| C | 4.27356000  | -2.18194100 | -0.51958200 |
| C | 3.12189100  | -1.42706800 | -0.36112600 |
| C | 3.16802200  | -0.17387600 | 0.26725700  |
| H | 4.46225000  | 1.28238300  | 1.22127800  |
| H | 6.50631700  | -0.06427000 | 0.94899000  |
| H | 4.25088900  | -3.14861000 | -1.00280000 |
| H | 2.17234100  | -1.79997300 | -0.72273600 |
| N | 6.70788000  | -2.46692900 | -0.19944500 |
| O | 6.61772400  | -3.54950200 | -0.76396300 |
| O | 7.75199300  | -2.00309600 | 0.24051100  |



|    |            |            |             |
|----|------------|------------|-------------|
| C  | 1.88020900 | 0.57683900 | 0.42053700  |
| C  | 1.87809400 | 1.96147900 | 1.04730400  |
| H  | 0.86272000 | 2.23592100 | 1.31158900  |
| H  | 2.53911800 | 2.06561200 | 1.90247400  |
| O  | 0.82595800 | 0.09025600 | 0.05792000  |
| Br | 2.47961700 | 3.29453400 | -0.29155000 |

Number of imaginary frequencies=0

**1a+2+3a**

51

|   |             |             |             |
|---|-------------|-------------|-------------|
| N | -0.32518700 | 3.54973000  | -1.90803000 |
| H | -0.58700100 | 4.46629200  | -2.25824200 |
| H | -0.91909600 | 2.86143800  | -2.36076300 |
| N | -0.55549700 | 3.50984600  | -0.51864500 |
| H | -1.50310600 | 3.61581900  | -0.15855700 |
| C | 0.46013600  | 3.24084500  | 0.32196400  |
| N | 1.66806500  | 3.06053100  | -0.22124700 |
| H | 1.73814600  | 3.05159900  | -1.23012300 |
| H | 2.43634100  | 2.72658200  | 0.34159900  |
| S | 0.18425000  | 3.15971700  | 2.01637500  |
| C | -5.02739800 | -1.02116400 | -0.51979300 |
| C | -3.71730600 | -0.46199900 | -0.44433200 |
| C | -3.53253300 | 0.89116400  | -0.26796500 |
| C | -4.62590200 | 1.77390900  | -0.15641800 |
| C | -5.92014800 | 1.22604000  | -0.22310800 |
| C | -6.12717000 | -0.12669800 | -0.40062100 |
| H | -2.84966100 | -1.10346300 | -0.51559500 |
| H | -2.52450400 | 1.28699800  | -0.20905700 |
| H | -6.78111600 | 1.88344400  | -0.13896300 |
| H | -7.14136400 | -0.49800500 | -0.45266800 |
| N | -5.21533800 | -2.35806200 | -0.69972000 |

|    |             |             |             |
|----|-------------|-------------|-------------|
| C  | -6.56443300 | -2.90480400 | -0.79808100 |
| H  | -7.10455100 | -2.50455200 | -1.66300400 |
| H  | -6.50452600 | -3.98452700 | -0.90693400 |
| H  | -7.14840200 | -2.68990200 | 0.10148500  |
| C  | -4.07606600 | -3.24788800 | -0.90931600 |
| H  | -3.39359000 | -3.24428100 | -0.05535100 |
| H  | -4.44055500 | -4.26320400 | -1.04282900 |
| H  | -3.50901500 | -2.97169600 | -1.80491800 |
| C  | -4.45908100 | 3.20390500  | 0.01549300  |
| H  | -5.40570800 | 3.77117200  | 0.11106600  |
| O  | -3.39735100 | 3.82123300  | 0.06104900  |
| C  | 3.17351500  | -2.10122000 | 0.38928600  |
| C  | 2.08741100  | -2.96725900 | 0.42645500  |
| C  | 0.87419200  | -2.49150600 | 0.91136200  |
| C  | 0.71395000  | -1.18534000 | 1.36373900  |
| C  | 1.80117600  | -0.32753100 | 1.30761800  |
| C  | 3.03741200  | -0.77301100 | 0.81767600  |
| H  | 4.11407400  | -2.47118100 | 0.00247600  |
| H  | 2.17411000  | -3.98898500 | 0.08451600  |
| H  | -0.24160300 | -0.85226300 | 1.74396000  |
| H  | 1.68990500  | 0.69404500  | 1.64879500  |
| N  | -0.28964300 | -3.40049900 | 0.94043200  |
| O  | -1.33772900 | -2.96803000 | 1.40835800  |
| O  | -0.15060000 | -4.52992600 | 0.49217200  |
| C  | 4.16478500  | 0.21027500  | 0.76995400  |
| C  | 5.58164600  | -0.27655500 | 0.51418500  |
| H  | 6.28643500  | 0.46113600  | 0.88250100  |
| H  | 5.79834200  | -1.25951800 | 0.92054200  |
| O  | 3.97671600  | 1.39977400  | 0.95195700  |
| Br | 5.88852100  | -0.39498900 | -1.44195300 |

Number of imaginary frequencies=0

## **Biological Studies:**

### **Materials and Methods:**

#### **Total Phenolic content:**

The Folin-Ciocalteu method was used to evaluate total phenolic content of individual samples. In brief, 0.4 mL of sample (50-800 µg/mL) solution was mixed with 0.4 mL of 10% (w/v) Folin-Ciocalteu reagent and 1.0 mL of Na<sub>2</sub>CO<sub>3</sub> (7%) to the mixture after 5 min, and incubated at 50 °C for 10 min. UV-VIS Spectrophotometer (Shimazu, UV-1780) was used to measure the absorbance at 765 nm against a blank without sample. The final data were expressed as mg/g of gallic acid equivalents in milligrams per gram (mg GAE/g) of dry extract.

#### **Total flavonoid content**

The total flavonoid content was estimated by following the previously described method. Total 1 mL of sample and standard (quercetin) solution (25-200 µg/mL) were added with 0.2 mL of 10% (w/v) AlCl<sub>3</sub> solution in methanol, 0.2 mL (1 M) potassium acetate and 5.6 mL distilled water. After 30 min incubation at room temperature, absorbance of the mixture was taken at 415 nm against the blank. The results were expressed as mg/g of quercetin equivalents in milligrams per gram (mg QE/g) of dry extract.

#### **DPPH radical scavenging assay**

Radical scavenging activity (RSA) of different samples was measured by using the DPPH method to evaluate the antioxidant activity. The sample solution of 2 mL (10-100 µg/mL) in methanol was mixed into 1 mL of DPPH (0.3 mM) solution. The combined solutions were stored in a dark area for 30 min and the absorbance was recorded at 517 nm against blank. Ascorbic acid was used as a positive control. The percentage of DPPH• scavenging activity (RSA %) was measured using the following equation:

$$\% \text{ Scavenging of DPPH}\bullet = [(A_0 - A_1)/A_0] \times 100$$

A<sub>0</sub> = absorbance of the control and A<sub>1</sub> = absorbance of the test samples. After determining the % scavenging of DPPH• of the different concentrations, the IC<sub>50</sub> values were determined for the ascorbic acid and samples.

#### **Reducing power assay**

The Fe<sup>3+</sup> reducing power of the sample was measured by following the method available in the literature. The different concentrations (100 to 300 µg/ml) of samples were mixed with phosphate buffer (0.2 M, pH 6.6) with potassium hexacyanoferrate (0.1%) followed by incubation at 50°C for 20 min. Further 10% tricarboxylic acid (TCA), distilled water (2.5 ml), and FeCl<sub>3</sub> solution (0.01%) were added for reaction mixture and incubated at room temperature for 10 min for color development. The absorbance of the final solution was recorded at 700 nm. Ascorbic acid was used as a positive control.

#### **α-Amylase Inhibitory Assay**

Following the literature, the reaction mixture was prepared by adding 25 ml sample solution (100-400 µg/mL), 50 µL of α-amylase (10 µg/mL) solution in phosphate buffer (pH 6.9) and 50 µL of starch solution (0.05%). The reaction was stopped by adding 25 µL of 1M HCl followed by adding up 100 mL of iodine-potassium iodide solution. The solution mixture was incubated for 10 min at 37 °C followed by measuring the absorbance at 630 nm. Acarbose was used as a positive control. The following formula was used to calculate the α-amylase inhibitory activity.

$$\% \text{ Inhibitory activity} = [(A_0 - A_1)/A_0] \times 100$$

$A_0$  = absorbance of the control and  $A_1$  = absorbance of the test samples. After determining the α-amylase inhibitory activity of the different concentrations, the  $IC_{50}$  values were determined for the acarbose and samples.

### Spectroscopic Data of Synthesized Compounds:

(E)-N,N-dimethyl-4-((2-(4-(4-nitrophenyl)thiazol-2-yl)hydrazono)methyl)aniline (**4a**) yield: 98% (360 mg)  $^1\text{H NMR}$  (400 MHz, DMSO-*d*6):  $\delta$  11.96 (s, 1H, NH), 8.28-8.25 (m, 2H, aromatic H), 8.10(d, 2H,  $J = 8.0$  Hz, aromatic H), 7.93 (s, 1H, H-C=N-), 7.65 (s, 1H, Thiazole H), 7.48 (d, 2H,  $J = 8.0$  Hz, aromatic H), 6.74 (d, 2H,  $J = 8.0$  Hz, aromatic H), 2.96 (s, 6H, -NMe<sub>2</sub>);  $^{13}\text{C NMR}$  (100 MHz, DMSO-*d*6):  $\delta$  169.30, 151.57, 148.95, 146.58, 143.35, 141.29, 128.12, 126.75, 124.55, 122.18, 112.38, 108.38, 39.98. HRMS (ESI)  $m/z$  calculated for C<sub>18</sub>H<sub>18</sub>N<sub>5</sub>O<sub>2</sub>S [M+H]<sup>+</sup> 368.1181, found 368.1181.

(E)-4-(4-bromophenyl)-2-(2-(2-nitrobenzylidene)hydrazinyl)thiazole (**4b**) yield: 92% (370 mg)  $^1\text{H NMR}$  (400 MHz, DMSO-*d*6):  $\delta$  12.54(s, 1H, NH), 8.42(s, 1H, H-C=N-), 8.03-8.01(m, 2H, aromatic H), 7.81-7.75(m, 3H, aromatic H), 7.62-7.58(m, 3H, aromatic H), 7.45(s, 1H, thiazole H);  $^{13}\text{C NMR}$  (100 MHz, DMSO-*d*6):  $\delta$  170.55, 152.11, 150.08, 139.05, 136.33, 136.16, 134.20, 132.44, 131.10, 130.20, 130.16, 127.34, 123.27, 107.94, HRMS (ESI)  $m/z$  calculated for C<sub>16</sub>H<sub>12</sub>BrN<sub>4</sub>O<sub>2</sub>S [M+H]<sup>+</sup> 402.9864, found 402.9865.

(E)-4-(4-bromophenyl)-2-(2-(4-methoxybenzylidene)hydrazinyl)thiazole (**4c**)<sup>3a</sup> yield: 95% (368 mg)  $^1\text{H NMR}$  (400 MHz, DMSO-*d*6):  $\delta$  12.02 (s, 1H, NH), 7.99 (s, 1H, H-C=N-), 7.81-7.79 (m, 2H, aromatic H), 7.61-7.59 (m, 4H, aromatic H), 7.37 (s, 1H, Thiazole H), 7.01-6.98 (m, 2H, aromatic H), 3.79 (s, 3H, -OCH<sub>3</sub>);  $^{13}\text{C NMR}$  (100 MHz, DMSO-*d*6):  $\delta$  168.95, 160.76, 149.83, 141.93, 134.42, 131.99, 128.30, 128.00, 127.44, 120.93, 114.83, 104.74, 55.74.

(E)-4-(4-bromophenyl)-2-(2-(4-chlorobenzylidene)hydrazinyl)thiazole (**4d**)<sup>3b</sup> yield: 92% (361 mg)  $^1\text{H NMR}$  (400 MHz, DMSO-*d*6):  $\delta$  12.25(s, 1H, -NH), 8.01(s, 1H, H-C=N-), 7.79(d,  $J=8.0$  Hz, 2H, aromatic H), 7.66(d, 2H,  $J=8.0$  Hz, aromatic H), 7.60-7.57(m, 2H, aromatic H), 7.48(d, 2H,  $J=8.0$  Hz, aromatic H), 7.41(s, 1H, thiazole H);  $^{13}\text{C NMR}$  (100 MHz, DMSO-*d*6):  $\delta$  168.68, 149.92, 140.52, 134.31, 134.11, 133.78, 132.02, 129.40, 128.34, 128.01, 121.02, 105.25.

(E)-4-(4-bromophenyl)-2-(2-(4-methylbenzylidene)hydrazinyl)thiazole (**4e**)<sup>3c</sup> yield: 92% (342 mg)  $^1\text{H NMR}$  (400 MHz, DMSO-*d*6):  $\delta$  12.09(s, 1H, NH), 7.99(s, 1H, H-C=N-), 7.79(d, 2H,  $J=8.0$  Hz, aromatic H), 7.58(d, 2H,  $J = 8.0$  Hz aromatic H), 7.53(d, 2H,  $J = 8.0$  Hz, aromatic H),

7.37 (s, 1H, thiazole H), 7.23(d, 2H,  $J = 8.0$  Hz, aromatic H), 2.31 (s, 3H, -CH<sub>3</sub>); <sup>13</sup>C NMR (100 MHz, DMSO-*d*6):  $\delta$  168.86, 149.82, 142.03, 139.50, 134.38, 132.11, 132.00, 129.91, 128.00, 126.74, 120.96, 104.92, 21.48.

(E)-3-(2-(2-benzylidenehydrazinyl)thiazol-4-yl)-2H-chromen-2-one (**4f**)<sup>3d</sup> yield: 93% (323 mg) <sup>1</sup>H NMR (400 MHz, DMSO-*d*6):  $\delta$  12.24 (s, 1H, NH), 8.55 (s, 1H, H-C=N-), 8.07 (s, 1H, aromatic H), 7.86 (d, 1H,  $J = 8.0$  Hz, aromatic H), 7.78 (s, 1H, Thiazole H), 7.68-7.61 (m, 3H, aromatic H), 7.47-7.38 (m, 5H, aromatic H); <sup>13</sup>C NMR (100 MHz, DMSO-*d*6):  $\delta$  168.19, 159.22, 152.79, 144.47, 142.18, 138.65, 134.75, 132.18, 129.87, 129.33, 129.32, 126.79, 125.19, 121.01, 119.66, 116.37, 111.15.

(E)-3-(2-(2-(4-methoxybenzylidene)hydrazinyl)thiazol-4-yl)-2H-chromen-2-one (**4g**)<sup>3d</sup> yield: 94% (354 mg) <sup>1</sup>H NMR (400 MHz, DMSO-*d*6):  $\delta$  12.06 (s, 1H, NH), 8.53 (s, 1H, H-C=N-), 8.01 (s, 1H, aromatic H), 7.85 (d,  $J = 8.0$ Hz, 1H, aromatic H), 7.75 (s, 1H, thiazole H), 7.65-7.60 (m, 3H, aromatic H), 7.45 (d,  $J = 8.0$ Hz, 1H, aromatic H), 7.41-7.37 (m, 1H, aromatic H), 7.00 (d,  $J = 8.0$  Hz, 2H, aromatic H), 3.79 (s, 3H, OCH<sub>3</sub>); <sup>13</sup>C NMR (100 MHz, DMSO-*d*6):  $\delta$ 168.26, 160.80, 159.22, 152.77, 144.41, 142.21, 138.57, 132.13, 129.28, 128.34, 127.37, 125.17, 121.03, 119.67, 116.36, 114.83, 110.83, 55.74.

(E)-4-(4-bromophenyl)-2-(2-(furan-2-ylmethylene)hydrazinyl)thiazole (**4h**)<sup>3e</sup> yield: 92% (320 mg) <sup>1</sup>H NMR (400 MHz, DMSO-*d*6):  $\delta$  12.13 (s, 1H, NH), 7.91 (s, 1H, H-C=N), 7.79-7.77(m,3H, aromatic H), 7.58 (d, 2H,  $J = 8.0$  Hz, aromatic H), 7.38 (s, 1H, aromatic H,) 6.80-6.79 (m, 1H, aromatic H), 6.60-6.58 (m, 1H, aromatic H); <sup>13</sup>C NMR (100 MHz, DMSO-*d*6):  $\delta$  168.51, 149.75, 145.02, 134.31, 132.17, 132.00, 128.00, 121.00, 112.78, 112.54, 105.02.

(E)-4-(4-nitrophenyl)-2-(2-(pyridin-2-ylmethylene)hydrazinyl)thiazole (**4i**)<sup>3f</sup> yield: 94% (305 mg) <sup>1</sup>H NMR (400 MHz, DMSO-*d*6):  $\delta$  12.54 (s,1H, NH), 8.58 (d, 1H,  $J = 4.0$  Hz, aromatic H), 8.29-8.26(m, 2H, aromatic H), 8.12-8.07 (m, 3H, H-C=N- and two aromatic H), 7.87-7.85 (m, 2H, aromatic H), 7.77 (s,1H, Thiazole H), 7.38-7.35 (m, 1H, aromatic H); <sup>13</sup>C NMR (100 MHz, DMSO-*d*6):  $\delta$  168.72, 153.50, 149.95, 149.07, 146.74, 142.50, 140.98, 137.36, 126.83, 124.61, 124.26 119.75, 109.53.

4-(4-nitrophenyl)-2-((E)-2-((E)-3-phenylallylidene)hydrazinyl)thiazole (**4j**) yield: 91% (318 mg) <sup>1</sup>H NMR (400 MHz, DMSO-*d*6):  $\delta$  12.20 (s, 1H, NH), 8.26 (d, 2H,  $J = 8.0$  Hz, aromatic H), 8.09 (d, 2H,  $J = 12$  Hz, olefenic H), 7.88 (d, 1H,  $J = 4$  H, aromatic H), 7.68 (s, 1H, H-C=N-), 7.59 (d, 2H,  $J = 8.0$  Hz, aromatic H), 7.38-7.34 (m, 3H, aromatic H and thiazole H), 6.99-6.97 (m, 2H, olefenic H and aromatic H); <sup>13</sup>C NMR (100 MHz, DMSO-*d*6):  $\delta$  168.64, 149.01, 146.67, 145.01, 141.11, 137.62, 136.57, 129.26, 129.01, 127.43, 126.80, 125.53, 124.59, 108.96. HRMS (ESI)  $m/z$  calculated for C<sub>18</sub>H<sub>15</sub>N<sub>4</sub>O<sub>2</sub>S [M+H]<sup>+</sup>351.0915, found 351.0916.

(E)-2-(2-benzylidenehydrazinyl)-4-phenylthiazole (**4k**)<sup>3g</sup> yield: 93% (259 mg) <sup>1</sup>H NMR (400 MHz, DMSO-*d*6):  $\delta$  12.19 (s, 1H, NH), 8.04 (s, 1H, H-C=N-), 7.87-7.85 (m, 2H, aromatic H), 7.67-7.65 (m, 2H, aromatic H), 7.46-7.39 (m, 5H, Thiazole H and aromatic H), 7.39-7.30 (m, 2H, aromatic H); <sup>13</sup>C NMR (75 MHz, DMSO-*d*6):  $\delta$  168.64, 151.07, 141.63, 135.15, 134.85, 129.67, 129.25, 129.02, 127.95, 126.68, 125.95, 104.12.

(E)-2-methoxy-4-((2-(4-(4-nitrophenyl)thiazol-2-yl)hydrazono)methyl)phenol (**4l**) yield: 93% (344 mg) <sup>1</sup>H NMR (400 MHz, DMSO-*d*6): δ 12.08 (s, 1H, NH), 9.46 (s, 1H, OH), 8.29-8.26 (m, 2H, aromatic H), 8.12-8.09 (m, 2H, aromatic H), 7.95 (s, 1H, H-C=N-), 7.69 (s, 1H, Thiazole H), 7.24 (d, 1H, *J* = 2.0 Hz, aromatic H), 7.09-7.07 (m, 1H, aromatic H), 6.83 (d, 1H, *J* = 8.0 Hz, aromatic H), 3.83 (s, 3H, -OCH<sub>3</sub>); <sup>13</sup>C NMR (100 MHz, DMSO-*d*6): δ 169.26, 148.86, 148.41, 146.64, 142.88, 141.23, 126.77, 126.19, 124.58, 120.98, 116.12, 109.77, 108.67, 55.98, HRMS (ESI) *m/z* calculated for C<sub>17</sub>H<sub>15</sub>N<sub>4</sub>O<sub>4</sub>S [M+H]<sup>+</sup> 371.0814, found 371.0809.

(E)-2-methoxy-5-((2-(4-(4-nitrophenyl)thiazol-2-yl)hydrazono)methyl)phenol (**4m**) yield: 93% (344 mg) <sup>1</sup>H NMR (400 MHz, DMSO-*d*6): δ 12.09 (s, 1H, NH), 9.26 (s, 1H, OH), 8.28 (d, 2H, *J* = 8.0 Hz, aromatic H), 8.11 (d, 2H, *J* = 8.0 Hz, aromatic H), 7.92 (s, 1H, H-C=N-), 7.70 (s, 1H, thiazole H), 7.20 (d, 1H, *J* = 4.0 Hz, aromatic H), 7.02-6.93 (m, 2H, aromatic H), 3.80 (s, 3H, -OCH<sub>3</sub>); <sup>13</sup>C NMR (100 MHz, DMSO-*d*6): δ 178.00, 150.03, 147.10, 146.88, 143.26, 127.47, 126.79, 124.59, 120.54, 120.19, 113.70, 112.41, 112.19, 108.72, 56.11. HRMS (ESI) *m/z* calculated for C<sub>17</sub>H<sub>15</sub>N<sub>4</sub>O<sub>4</sub>S [M+H]<sup>+</sup> 371.0814, found 371.0810.

(E)-4-(4-bromophenyl)-2-(2-((5-bromothiophen-2-yl)methylene)hydrazinyl)thiazole (**4n**)<sup>3c</sup> yield: 93% (412 mg) <sup>1</sup>H NMR (400 MHz, DMSO-*d*6): δ 12.24 (s, 1H, NH), 8.11 (s, 1H, H-C=N-), 7.78 (d, 2H, *J* = 8.0 Hz, aromatic H), 7.58 (d, 2H, *J* = 8.0 Hz, aromatic H), 7.40 (s, 1H, thiazole H), 7.22-7.19 (m, 2H, aromatic H); <sup>13</sup>C NMR (100 MHz, DMSO-*d*6): δ 168.25, 157.94, 141.31, 136.29, 134.24, 132.02, 131.72, 130.07, 127.99, 121.04, 113.76, 105.27.

(E)-2-(2-(2-nitrobenzylidene)hydrazinyl)-4-(*p*-tolyl)thiazole (**4o**)<sup>3h</sup> yield: 94% (318 mg) <sup>1</sup>H NMR (400 MHz, DMSO-*d*6): δ 12.55 (s, 1H, NH), 8.43 (s, 1H, H-C=N-), 8.07-8.04 (m, 2H, aromatic H), 7.83-7.75 (m, 3H, aromatic H), 7.65-7.60 (m, 1H, aromatic H), 7.33 (s, 1H, Thiazole H), 7.23 (d, 2H, *J* = 8.0 Hz), 2.34 (s, 3H, CH<sub>3</sub>); <sup>13</sup>C NMR (100 MHz, DMSO-*d*6): δ 168.07, 147.92, 137.39, 136.81, 133.98, 132.18, 130.18, 129.67, 129.04, 127.95, 125.97, 125.17, 103.80, 21.29.

(E)-2-(2-(2-nitrobenzylidene)hydrazinyl)-4-phenylthiazole (**4p**)<sup>3i</sup> yield: 90% (291 mg) <sup>1</sup>H NMR (400 MHz, DMSO-*d*6): δ 12.56 (s, 1H, NH), 8.43 (s, 1H, H-C=N-), 8.06-8.03 (m, 2H, aromatic H), 7.87-7.77 (m, 3H, aromatic H), 7.64-7.59 (m, 1H, aromatic H), 7.44-7.40 (m, 3H, Thiazole H and aromatic H), 7.33-7.29 (m, 1H, aromatic H); <sup>13</sup>C NMR (100 MHz, DMSO-*d*6): δ 168.19, 162.76, 147.92, 136.62, 134.99, 134.00, 130.21, 129.12, 129.02, 128.11, 127.97, 126.02, 125.18, 104.88. HRMS (ESI) *m/z* calculated for C<sub>16</sub>H<sub>13</sub>N<sub>4</sub>O<sub>2</sub>S [M+H]<sup>+</sup> 325.0759, found 325.0759.

(E)-2-(2-(4-nitrobenzylidene)hydrazinyl)-4-(4-nitrophenyl)thiazole (**4q**)<sup>3f</sup> yield: 96% (354 mg) <sup>1</sup>H NMR (400 MHz, DMSO-*d*6): δ 12.62 (s, 1H, NH), 8.30-8.27 (m, 2H, aromatic H), 8.13 (s, 1H, H-C=N-), 7.92-7.87 (m, 4H, aromatic H), 7.48 (m, 3H, Thiazole H and aromatic H); <sup>13</sup>C NMR (75 MHz, DMSO-*d*6): δ 167.88, 147.84, 140.79, 138.95, 133.44, 132.09, 128.53, 127.25, 127.25, 126.96, 123.97, 105.15.

(E)-4-(4-chlorophenyl)-2-(2-(2-nitrobenzylidene)hydrazinyl)thiazole (**4r**)<sup>3j</sup> yield: 93% (333 mg) <sup>1</sup>H NMR (400 MHz, DMSO-*d*6): δ 12.55 (s, 1H, NH), 8.43 (s, 1H, H-C=N-), 8.04-8.02 (m, 2H, aromatic H), 7.88-7.86 (m, 2H, aromatic H), 7.81-7.77 (m, 1H, H-C=N-), 7.63-7.59 (m, 1H,

aromatic H), 7.48-7.45 (m, 3H, aromatic H);  $^{13}\text{C}$  NMR (100 MHz, DMSO-*d*6):  $\delta$  168.54, 147.80, 137.10, 133.96, 133.56, 132.64, 130.42, 129.14, 129.14, 128.59, 128.22, 127.69, 125.06, 105.61.

(E)-2-(2-(4-methoxybenzylidene)hydrazinyl)-4-(4-nitrophenyl)thiazole (**4s**)<sup>3a</sup> yield: 97% (343 mg)  $^1\text{H}$  NMR (400 MHz, DMSO-*d*6):  $\delta$  12.14 (s, 1H, NH), 8.29-8.26 (m, 2H, aromatic H), 8.11 (d, 2H,  $J = 8.0$  Hz, aromatic H), 8.01 (s, 1H, H-C=N-), 7.70 (s, 1H, Thiazole H), 7.61 (d, 2H,  $J = 8.0$  Hz, aromatic H), 7.01 (d, 2H,  $J = 8.0$  Hz, aromatic H), 3.80 (s, 3H, -OCH<sub>3</sub>);  $^{13}\text{C}$  NMR (100 MHz, DMSO-*d*6):  $\delta$  169.23, 160.84, 149.00, 146.66, 142.31, 141.21, 128.37, 127.36, 126.79, 124.57, 114.84, 108.76, 55.75.

(E)-2-(2-(1-(4-iodophenyl)ethylidene)hydrazinyl)-4-(4-nitrophenyl)thiazole (**6a**) yield: 95% (441 mg)  $^1\text{H}$  NMR (400 MHz, DMSO-*d*6):  $\delta$  11.48 (s, 1H, NH), 8.29 (d, 2H,  $J = 8.0$  Hz, aromatic H), 8.13 (d, 2H,  $J = 8.0$  Hz, aromatic H), 7.80-7.74 (m, 3H, aromatic H and thiazole H), 7.57 (d, 2H,  $J = 8.0$  Hz, aromatic H), 2.35 (s, 3H, CH<sub>3</sub>);  $^{13}\text{C}$  NMR (75 MHz, DMSO-*d*6):  $\delta$  170.52, 149.15, 146.62, 141.24, 138.08, 137.75, 137.68, 130.36, 128.15, 126.77, 124.59, 109.61, 14.29. HRMS (ESI)  $m/z$  calculated for C<sub>17</sub>H<sub>14</sub>IN<sub>4</sub>O<sub>2</sub>S [M+H]<sup>+</sup> 464.9882, found 464.9877.

(E)-3-(2-(2-(1-phenylethylidene)hydrazinyl)thiazol-4-yl)-2H-chromen-2-one (**6b**)<sup>3d</sup> yield: 93% (336 mg)  $^1\text{H}$  NMR (400 MHz, DMSO-*d*6):  $\delta$  11.33 (s, 1H, NH), 8.58 (s, 1H, thiazole H), 7.84-7.78 (m, 4H, aromatic H), 7.65-7.62 (m, 1H, aromatic H), 7.48-7.37 (m, 5H, aromatic H), 2.34 (s, 3H, CH<sub>3</sub>);  $^{13}\text{C}$  NMR (100 MHz, DMSO-*d*6):  $\delta$  169.79, 159.24, 152.78, 147.39, 138.53, 138.26, 132.18, 129.28, 128.92, 126.18, 125.24, 121.15, 119.65, 116.39, 111.54, 14.54.

(E)-4-(4-bromophenyl)-2-(2-(1-(4-bromophenyl)ethylidene)hydrazinyl)thiazole (**6c**)<sup>3k</sup> yield: 92% (415 mg)  $^1\text{H}$  NMR (400 MHz, DMSO-*d*6):  $\delta$  11.36 (s, 1H, NH), 7.84-7.82 (m, 2H, aromatic H), 7.73-7.71 (m, 2H, aromatic H), 7.63-7.59 (m, 4H, aromatic H), 7.42 (s, 1H, Thiazole H), 2.31 (s, 3H, -CH<sub>3</sub>);  $^{13}\text{C}$  NMR (100 MHz, DMSO-*d*6):  $\delta$  170.25, 149.89, 146.08, 137.45, 134.32, 132.02, 131.84, 128.13, 128.02, 122.59, 120.99, 105.54, 14.27.

(E)-2-(2-(1-(4-bromophenyl)ethylidene)hydrazinyl)-4-(p-tolyl)thiazole (**6d**)<sup>3l</sup> yield: 93% (359 mg)  $^1\text{H}$  NMR (300 MHz, DMSO-*d*6):  $\delta$  11.32 (s, 1H, NH), 7.79-7.72 (m, 4H, aromatic H), 7.63 (d, 2H,  $J = 8.4$  Hz, aromatic H), 7.27-7.22 (m, 3H, aromatic H), 2.33 (s, 3H, -CH<sub>3</sub>), 2.32 (s, 3H, -CH<sub>3</sub>);  $^{13}\text{C}$  NMR (75 MHz, DMSO-*d*6):  $\delta$  169.98, 150.95, 145.98, 137.7, 137.17, 132.56, 131.69, 129.48, 128.03, 125.94, 122.35, 103.48, 21.09, 14.10.

(E)-2-(2-(1-phenylethylidene)hydrazinyl)-4-(p-tolyl)thiazole (**6e**)<sup>3m</sup> yield: 92% (282 mg)  $^1\text{H}$  NMR (400 MHz, DMSO-*d*6):  $\delta$  11.22 (s, 1H, NH), 7.80-7.76 (m, 4H, aromatic H), 7.45-7.35 (m, 3H, aromatic H), 7.24-7.21 (m, 3H, aromatic H and thiazole H), 2.32 (s, 6H, 2×CH<sub>3</sub>);  $^{13}\text{C}$  NMR (100 MHz, DMSO-*d*6):  $\delta$  170.22, 146.78, 138.42, 137.20, 132.62, 129.65, 129.13, 128.89, 126.13, 125.95, 103.63, 21.27, 14.46.

(E)-4-(4-nitrophenyl)-2-(2-(1-(4-nitrophenyl)ethylidene)hydrazinyl)thiazole (**6f**) yield: 96% (368 mg)  $^1\text{H}$  NMR (400 MHz, DMSO-*d*6):  $\delta$  11.75 (s, 1H, NH), 8.32-8.27 (m, 4H, aromatic H), 8.15-8.14 (m, 2H, aromatic H), 8.04-8.02 (m, 2H, aromatic H), 7.80 (s, 1H, Thiazole H), 2.39 (s, 3H, -CH<sub>3</sub>);  $^{13}\text{C}$  NMR (100 MHz, DMSO-*d*6):  $\delta$  170.21, 149.28, 147.60, 145.28, 144.73, 141.15,



127.15, 126.85, 124.64, 124.19, 110.08, 14.46, HRMS (ESI)  $m/z$  calculated for  $C_{17}H_{14}N_5O_4S$   $[M+H]^+$  384.0766, found 384.0769.

(E)-4-phenyl-2-(2-(1-phenylethylidene)hydrazinyl)thiazole (**6g**)<sup>3g</sup> yield: 90% (264 mg)  $^1H$  NMR (400 MHz, DMSO-*d*6):  $\delta$  11.27 (s, 1H, NH), 7.90-7.80 (m, 2H, aromatic H), 7.79-7.77 (m, 2H, aromatic H), 7.45-7.35 (m, 6H, Thiazole H and six aromatic H), 7.33-7.32(m, 1H, aromatic H), 2.33 (s, 3H, -CH<sub>3</sub>);  $^{13}C$  NMR (75 MHz, DMSO-*d*6):  $\delta$  170.29, 151.02, 146.90, 138.39, 135.25, 129.09, 129.02, 128.84, 127.89, 126.10, 125.96, 104.48, 14.44.

4-(4-chlorophenyl)-2-(2-(diphenylmethylene)hydrazinyl)thiazole (**6h**) yield: 92% (358 mg)  $^1H$  NMR (400 MHz, DMSO-*d*6):  $\delta$  10.66 (s, 1H, NH), 7.82 (d, 2H,  $J = 8.0$  Hz, aromatic H), 7.58-7.55 (m, 3H, thiazole H and aromatic H), 7.45-7.32 (m, 10H, aromatic H);  $^{13}C$  NMR (100 MHz, DMSO-*d*6):  $\delta$  169.56, 149.95, 149.11, 137.89, 134.05, 133.18, 132.38, 129.74, 129.27, 129.05, 128.93, 128.24, 127.67, 127.15, 105.62, HRMS (ESI)  $m/z$  calculated for  $C_{22}H_{17}ClN_3S$   $[M+H]^+$  390.0832, found 390.0830.

(E)-4-(4-bromophenyl)-2-(2-(1-(pyridin-2-yl)ethylidene)hydrazinyl)thiazole (**6i**)<sup>3n</sup> yield: 93% (347 mg)  $^1H$  NMR (400 MHz, DMSO-*d*6):  $\delta$  11.50 (s, 1H, NH), 8.57 (d, 1H,  $J = 8.0$  Hz, aromatic H), 8.03-8.00 (m, 1H, aromatic H), 7.84-7.81 (m, 3H, aromatic H), 7.62-7.59 (m, 2H, aromatic H), 7.46 (s, 1H, Thiazole H), 7.37-7.34 (m, 1H, aromatic H), 2.39 (s, 3H, -CH<sub>3</sub>);  $^{13}C$  NMR (75 MHz, DMSO-*d*6):  $\delta$  169.97, 155.31, 150.01, 149.06, 147.59, 137.02, 134.43, 132.03, 128.03, 123.93, 121.00, 120.02, 105.89, 12.75.

4-(4-bromophenyl)-2-(2-(propan-2-ylidene)hydrazinyl)thiazole (**6j**)<sup>3o</sup> yield: 90% (279 mg)  $^1H$  NMR (400 MHz, DMSO-*d*6):  $\delta$  10.67 (s, 1H, NH), 7.80-7.76 (m, 2H, aromatic H), 7.58-7.55 (m, 2H, aromatic H), 7.29 (s, 1H, Thiazole H), 1.94 (s, 3H, -CH<sub>3</sub>), 1.92 (s, 3H, -CH<sub>3</sub>);  $^{13}C$  NMR (100MHz, DMSO-*d*6):  $\delta$  170.53, 150.39, 149.70, 134.62, 131.95, 127.98, 120.78, 104.61, 25.34, 18.17.

(E)-4-(4-bromophenyl)-2-(2-(1-(4-nitrophenyl)ethylidene)hydrazinyl)thiazole (**6k**)<sup>3p</sup> yield: 95% (396 mg)  $^1H$  NMR (400 MHz, DMSO-*d*6):  $\delta$  11.63 (s, 1H, NH), 8.25-8.24(m, 2H, aromatic H), 8.00-7.99 (m, 2H, aromatic H), 7.82 (d, 2H,  $J = 8.0$  Hz, aromatic H), 7.60-7.59 (m, 2H, aromatic H), 7.46(s, 1H, Thiazole H), 2.36 (s, 3H, -CH<sub>3</sub>);  $^{13}C$  NMR (100 MHz, DMSO-*d*6):  $\delta$  169.91, 147.47, 144.45, 134.30, 132.04, 131.74, 128.04, 127.03, 125.77, 124.16, 121.06, 106.06, 14.36.

2-(2-cyclohexylidenehydrazinyl)-4-(4-nitrophenyl)thiazole (**6l**)<sup>3q</sup> yield: 92% (291 mg)  $^1H$  NMR (400 MHz, DMSO-*d*6):  $\delta$  10.98 (s, 1H, NH), 8.28-8.25 (m, 2H, aromatic H), 8.11-8.08 (m, 2H, aromatic H), 7.62 (s, 1H, thiazole H), 2.46-2.43 (m, 2H, cyclohexane ring), 2.27-2.24 (m, 2H, cyclohexane ring), 1.65-1.57 (m, 6H, cyclohexane ring);  $^{13}C$  NMR (100 MHz, DMSO-*d*6):  $\delta$  170.98, 156.17, 146.53, 141.44, 126.72, 124.57, 108.61, 35.23, 27.68, 27.31, 26.01, 25.55.

(E)-4-(4-nitrophenyl)-2-(2-(1,7,7-trimethylbicyclo[2.2.1]heptan-2-ylidene)hydrazinyl)thiazole(**6m**) yield: 92% (340 mg)  $^1H$  NMR (400 MHz, DMSO-*d*6):  $\delta$  10.72 (s, 1H, NH), 8.28-8.24 (m, 2H, aromatic H), 8.11-8.07 (m, 2H, aromatic H), 7.61 (s, 1H, thiazole H), 2.04-1.82 (m, 2H, camphor H), 1.81-1.68 (m, 2H, camphor H), 1.36-1.29 (m, 3H, camphor H), 1.28-1.18 (m, 6H, camphor H), 0.75 (s, 3H, camphor H);  $^{13}C$  NMR (100 MHz, DMSO-*d*6):  $\delta$

170.88, 165.38, 148.87, 146.50, 141.46, 126.69, 124.54, 108.55, 52.60, 48.10, 43.91, 35.25, 32.92, 27.34, 19.69, 18.97, 11.65. HRMS (ESI) m/z calculated for C<sub>19</sub>H<sub>23</sub>N<sub>4</sub>O<sub>2</sub>S [M+H]<sup>+</sup>371.1542, found 371.1539.

(E)-2-(4-(dimethylamino)benzylidene)hydrazinecarbothioamide (**G**) <sup>1</sup>H NMR (400 MHz, CDCl<sub>3</sub>): δ9.38 (s, 1H, NH), 7.76 (s, 1H, H-C=N-), 7.53, (d, 2H, *J* = 8.0 Hz, aromatic H), 7.20 (s, 1H, NH<sub>2</sub>), 6.69 (d, 2H, *J* = 9.2 Hz, aromatic H), 6.28 (s, 1H, NH<sub>2</sub>) 3.05(s, 6H, NMe<sub>2</sub>); <sup>13</sup>C NMR (75 MHz, CDCl<sub>3</sub>): δ 177.90, 151.76, 144.14, 128.46, 120.15, 111.40, 39.47, HRMS (ESI) m/z calculated for C<sub>10</sub>H<sub>15</sub>N<sub>4</sub>S [M+H]<sup>+</sup> 223.1017, found 223.1016.

## References:

1. P. Job, *Ann. Chem.* 1928, **9**, 113.
2. H. A. Benesi, and J. H. Hildebrand, *J. Am. Chem. Soc.* 1949, **71**, 2703.
3. (a) G. T. Reddy, G. Kumar, and N. G. Reddy, *Adv. Synth.Catal.*, 2018, **360**, 995; (b) M. S. Alam, J. U. Ahmed, and D. U. Lee, *Chem. Pharm. Bull.*, 2014, **62**, 1259; (c) P. A. Channar, A. Saeed, S. Afzal, D. Hussain, M. Kalesse, S. A. Shehzadi, and J. Iqbal, *Mol. Divers.*, 2021, **25**, 1; (d) K. Godugu, T. R. Gundala, R. Bodapati, V. D. S. Yadala, S. S. Loka, and C. G. RNallagondur, *New J. Chem.*, 2020,**44**, 7007; (e) D. Secci, A. Bolasco, S. Carradori, M. D'Ascenzio, R. Nescatelli, and M. Yáñez, *Eur.J. Med.Chem.*, 2012, **58**, 405; (f) A. Rauf, M. K. Kashif, B. A. Saeed, N. A. Al-Masoudi, and S. Hameed, *J. Mol. Struc.*, 2019, **1198**, 126866; (g) J. Tiwari, S. Singh, F. Tufail, D. Jaiswal, J. Singh, and J. Singh, *ChemistrySelect*, 2018, **3**, 11634; (h) M. H. Abdellattif, M. A. Hussien, and E. Alzahrani, *IJPSR*. 2018, **9**, 5060; (i) K. M. Khan, M. Irfan, M. Ashraf, M. Taha, S. M. Saad, S. Perveen, and M. I. Choudhary, *Med. Chem. Res.*, 2015, **24**, 3077; (j) F. Rahim, H. Ullah, M. T. Javid, A. Wadood, M. Taha, M. Ashraf, A. Shaukat, M. Junaid, S. Hussain, W. Rehman, R. Mehmood, M. Sajid, M. N. Khan, and K. M. Khan, *Bioorganic chemistry*, 2015, **62**, 15; (k) Y. Zhang, X. Fu, Y. Yan, and J. Liu, *J. Heterocycl. Chem.*, 2020, **57**, 991; (l) M. S. Solanki, and J. P. Trivedi, *J. Ind. Chem. Soc.* 1972,**49**, 37; (m) R. Pundeer, V. Kiran, O. P. Sushma, and S. C. Bhatia, *Der Pharma Chemica*, 2011, **3**, 109; (n) R. E. Khidre, S. R. El-Gogary, and M. S. Mostafa, *J. Heterocycl. Chem*, 2017, **54**, 2511; (o) S. Carradori, D. Secci, M. D'Ascenzio, P. Chimenti, and A. Bolasco, *J. Heterocycl. Chem*, 2014, **51**, 1856; (p) K. K. Bansal, D. Sharma, R. Archana, H. Rajak, and P. C. Sharma, *Indian J. Heterocycl. Chem.* 2018, **28**, 305; (q) R. Meleddu, S. Distinto, A. Corona, E. Maccioni, A. Arridu, C. Melis, G. Bianco, P. Matyus, F. Cottiglia, A. Sanna, and A. De Logu, *J Enzyme Inhib Med Chem*, 2016; **31**, 1672–1677.

# $^1\text{H}$ and $^{13}\text{C}$ NMR spectra of 4a

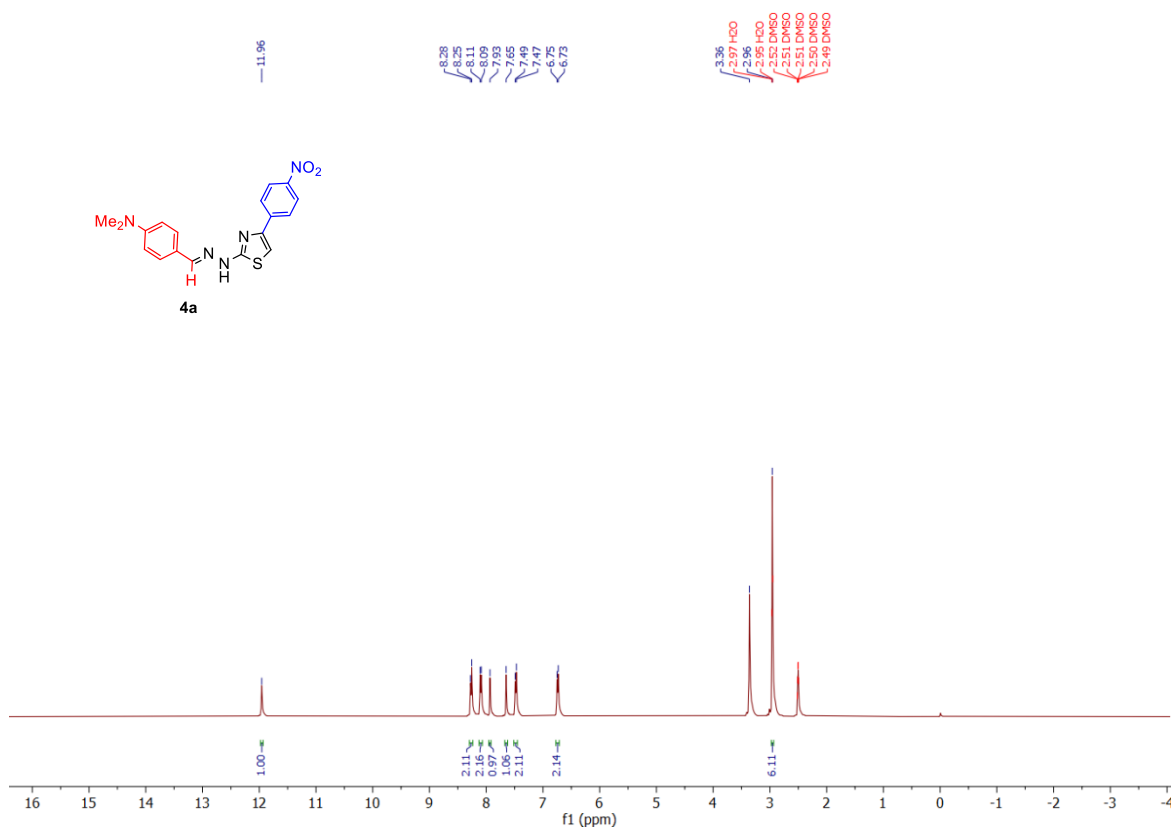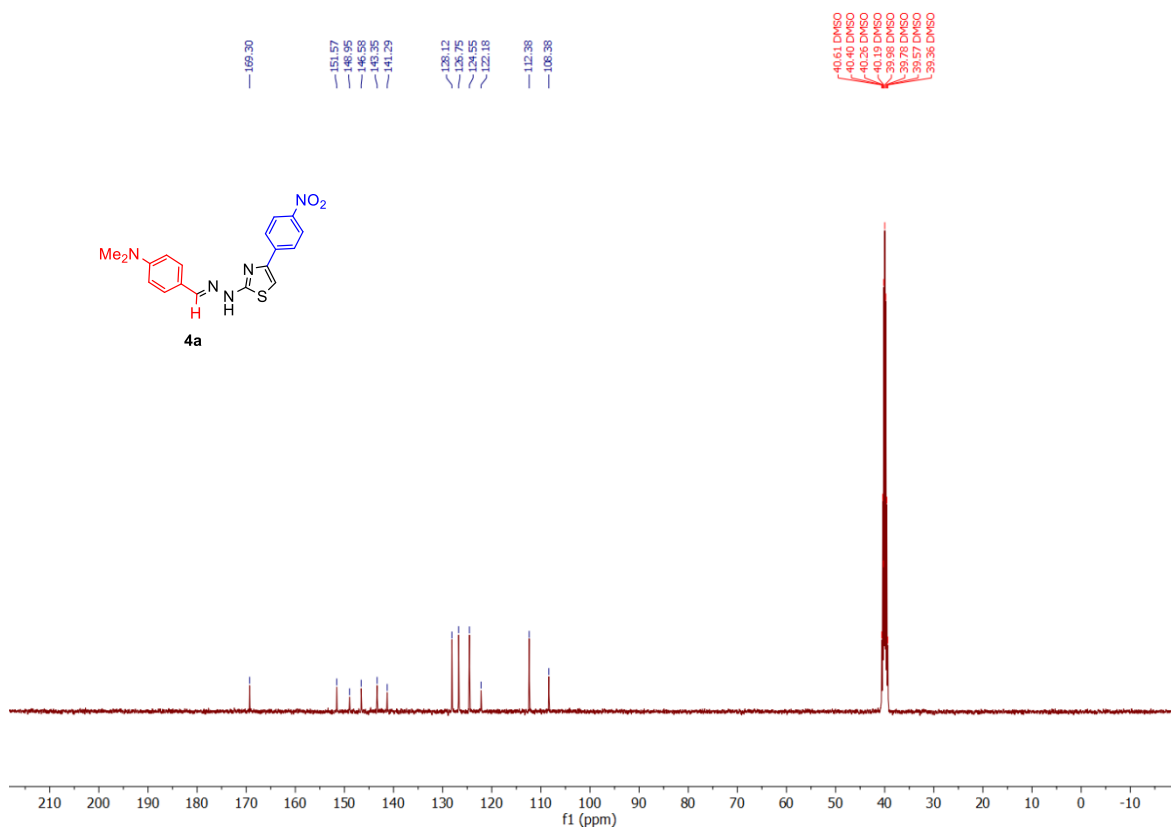

# $^1\text{H}$ and $^{13}\text{C}$ NMR spectra of 4b

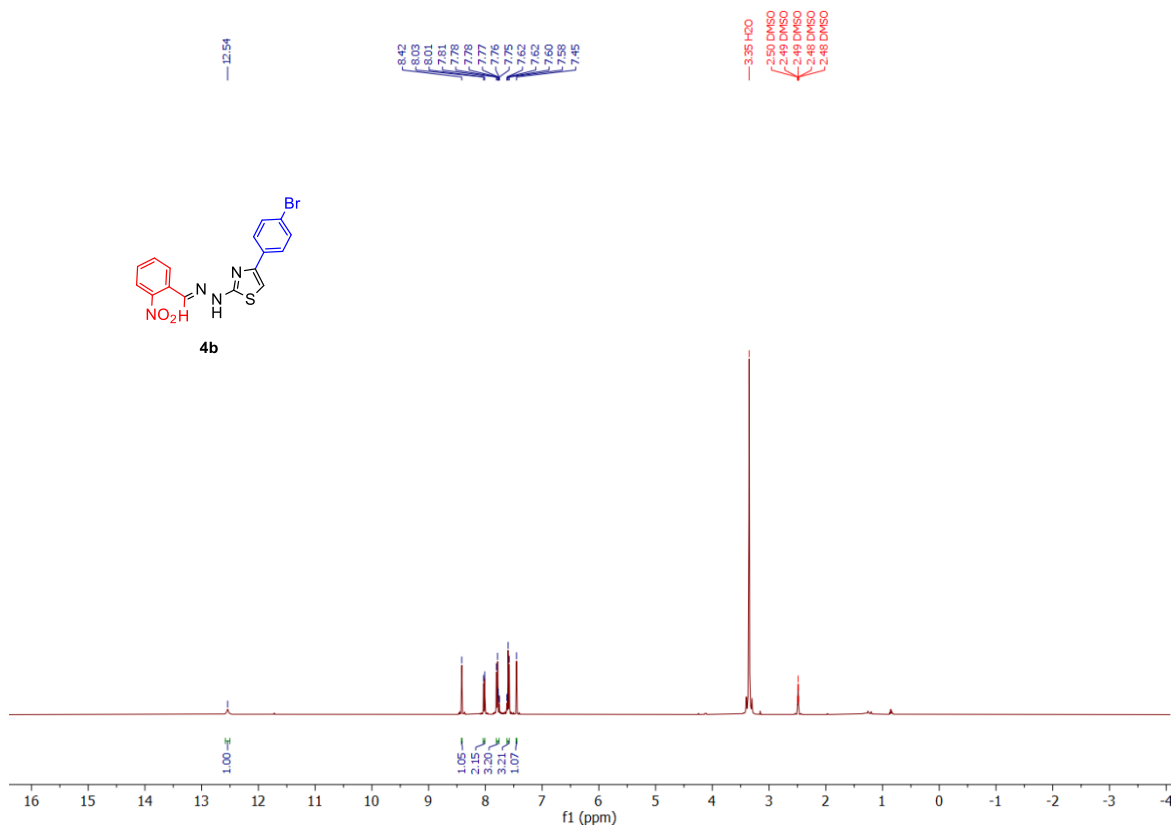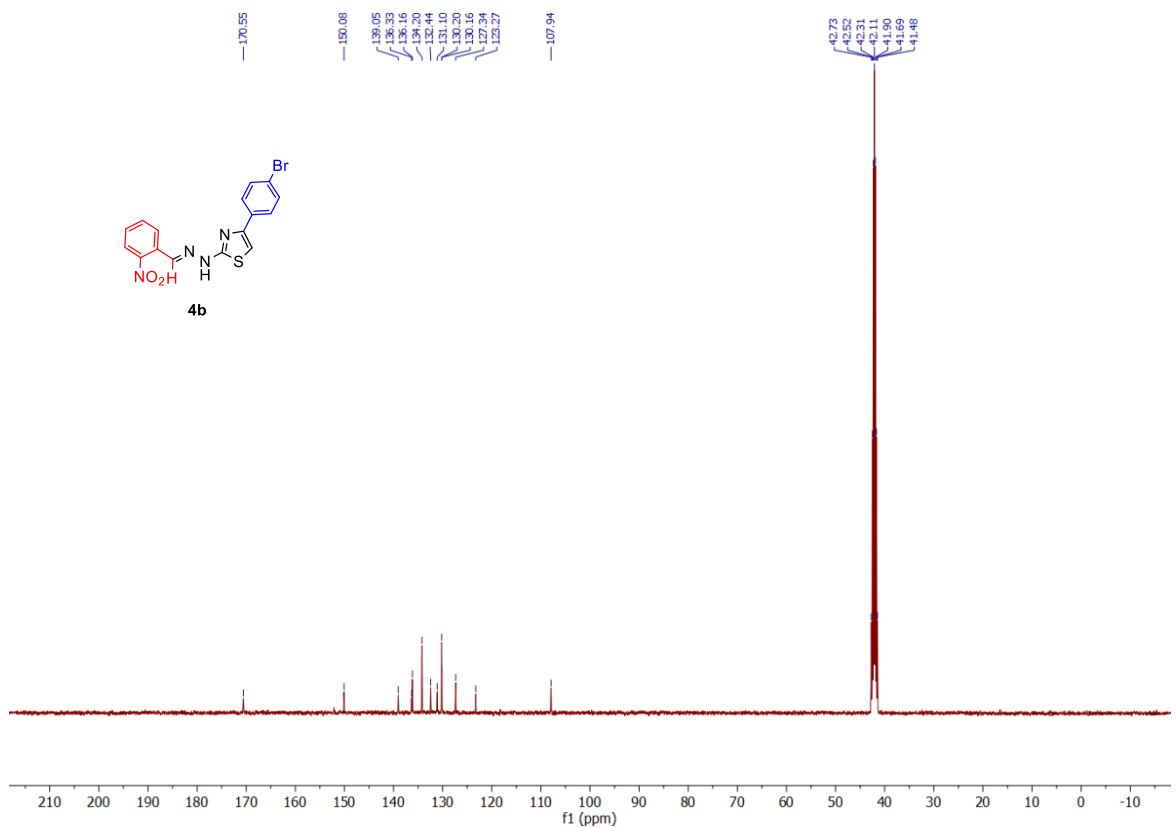

# <sup>1</sup>H and <sup>13</sup>C NMR spectra of 4c

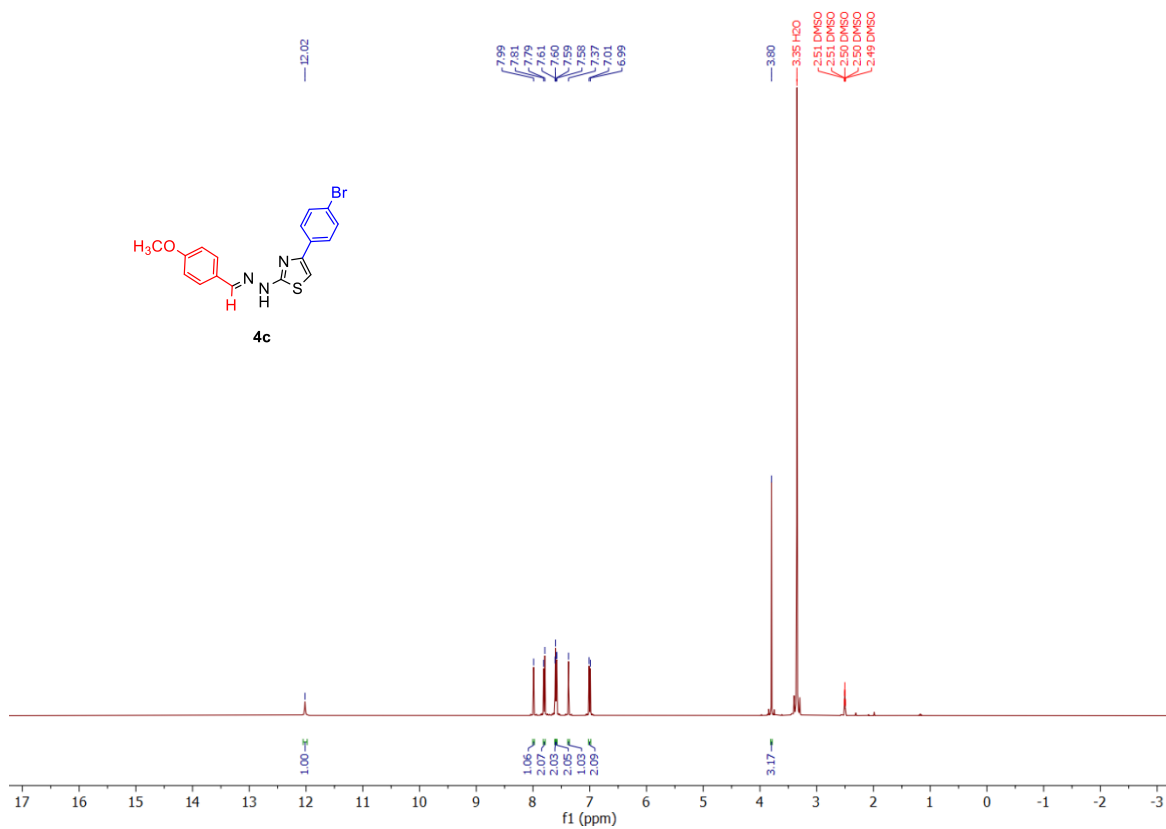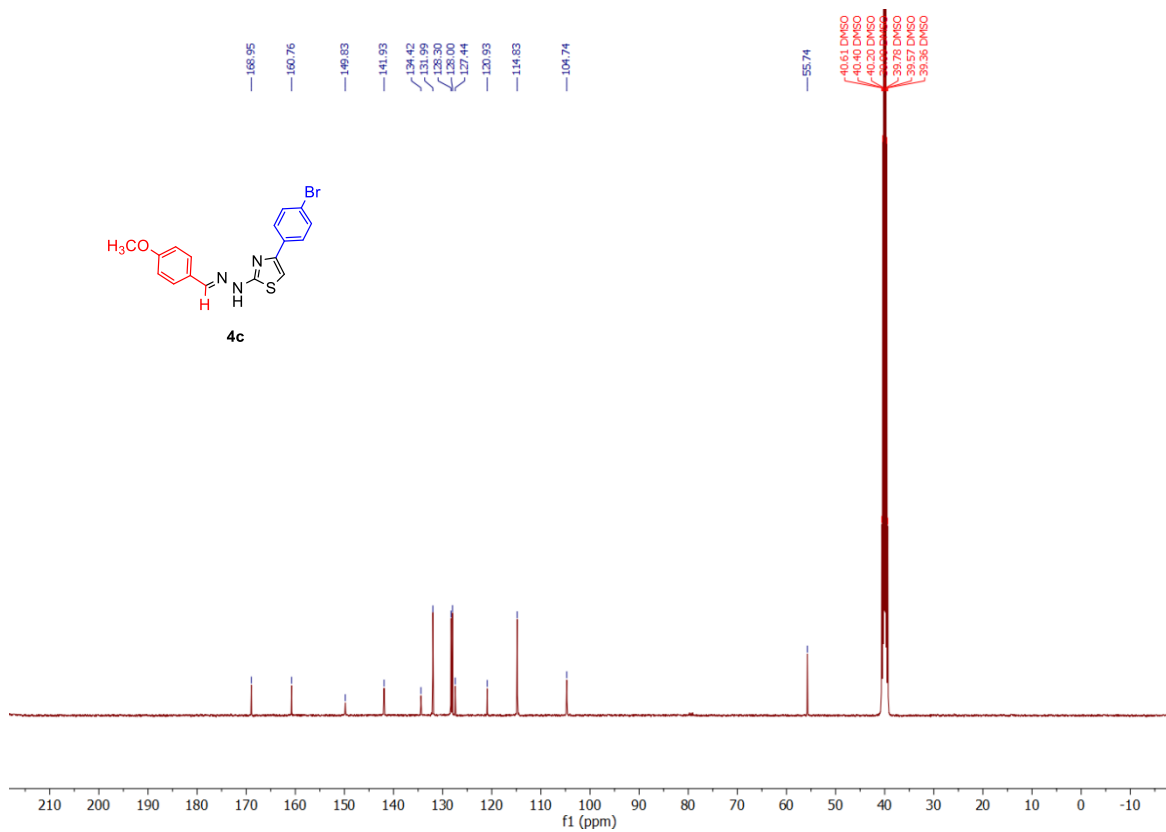

# $^1\text{H}$ and $^{13}\text{C}$ NMR spectra of 4d

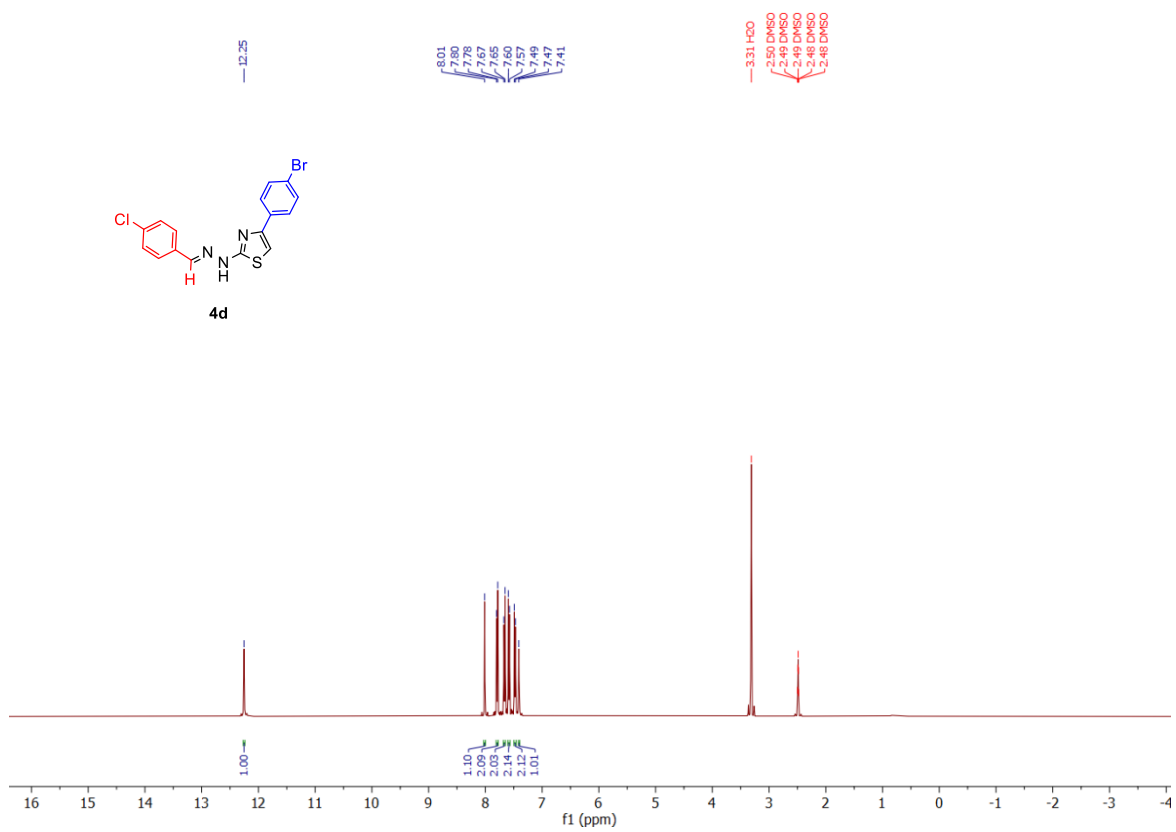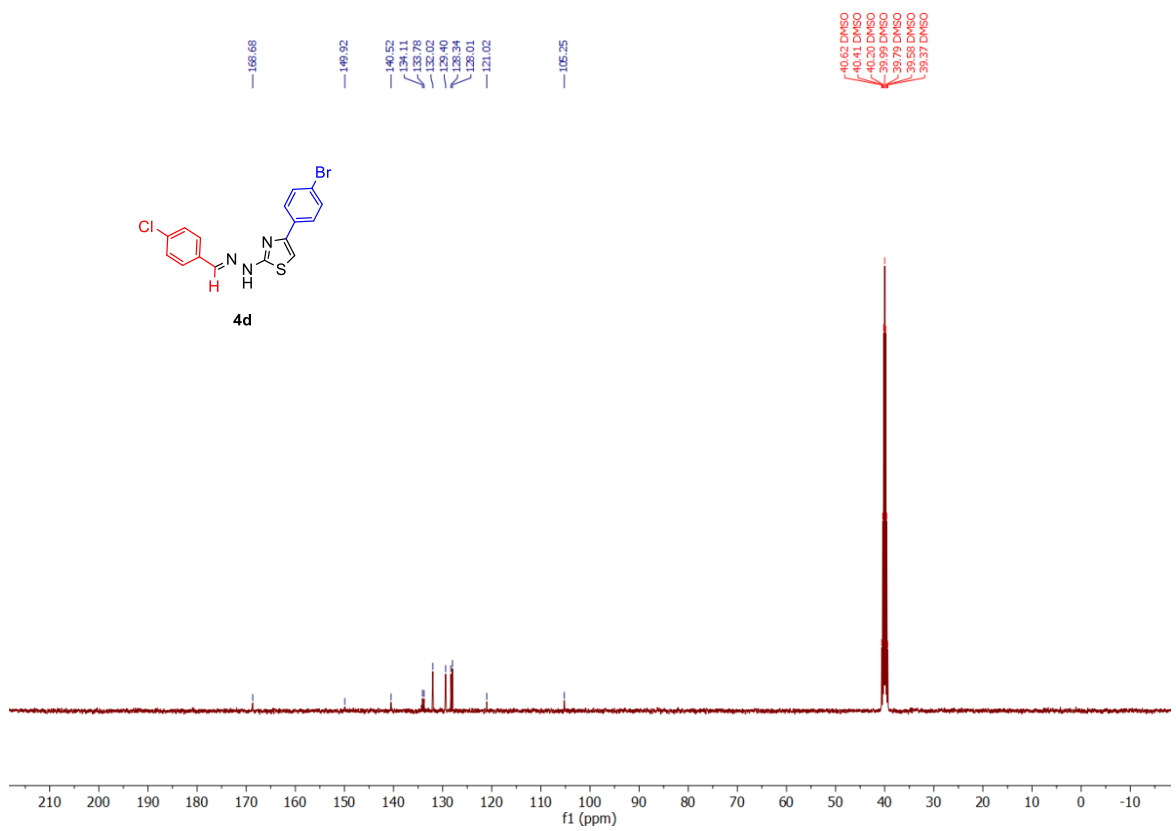





# $^1\text{H}$ and $^{13}\text{C}$ NMR spectra of 4f

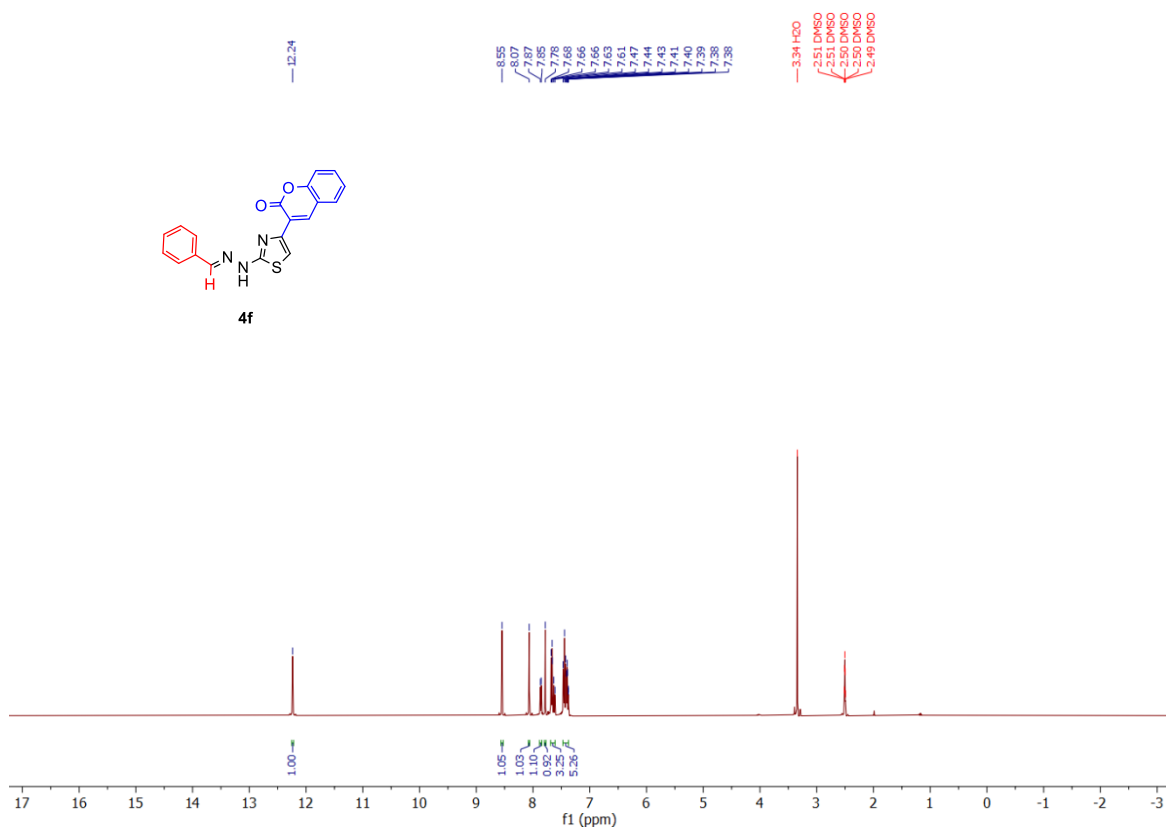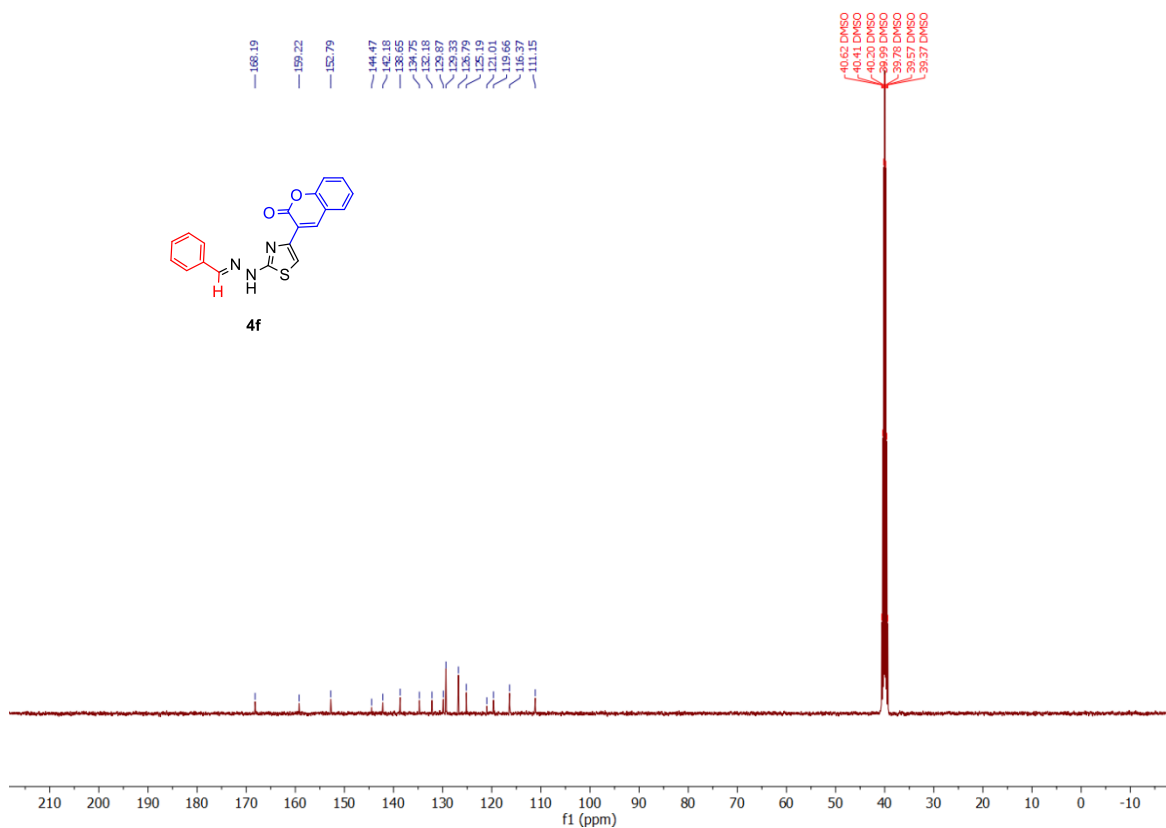

# <sup>1</sup>H and <sup>13</sup>C NMR spectra of 4g

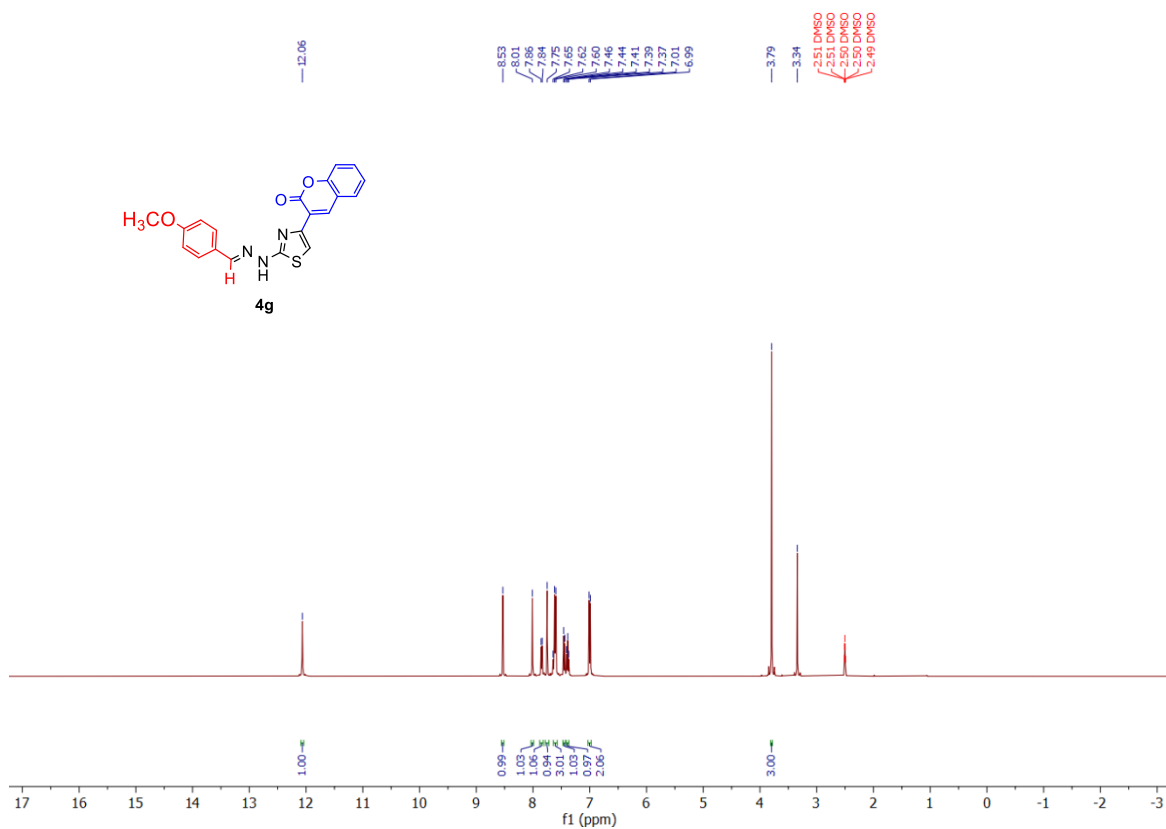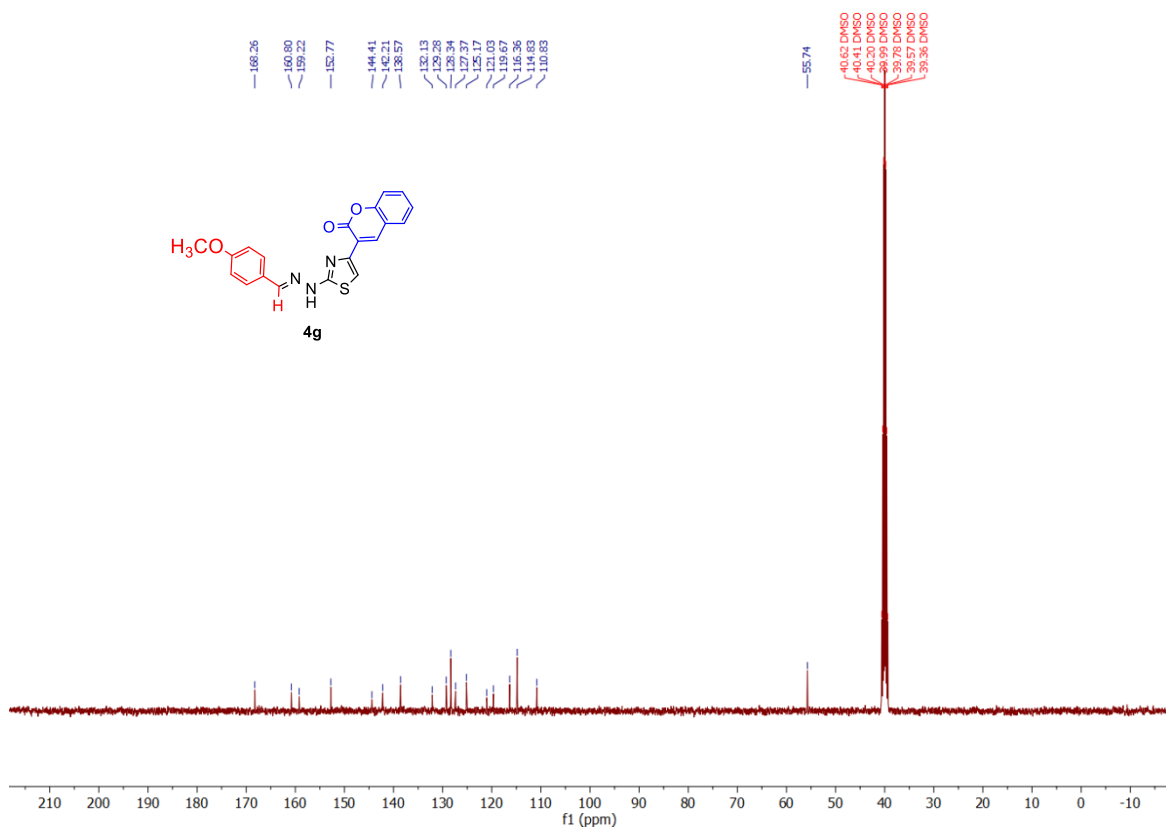

# $^1\text{H}$ and $^{13}\text{C}$ NMR spectra of 4h

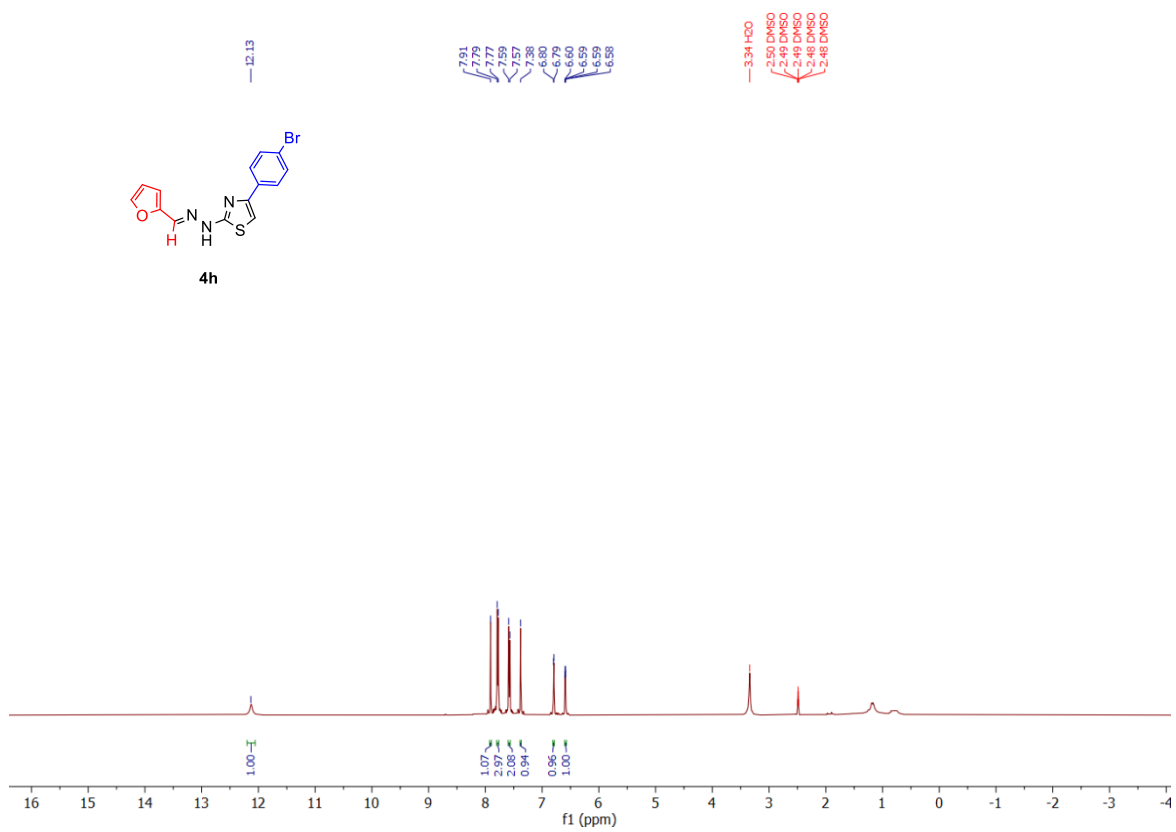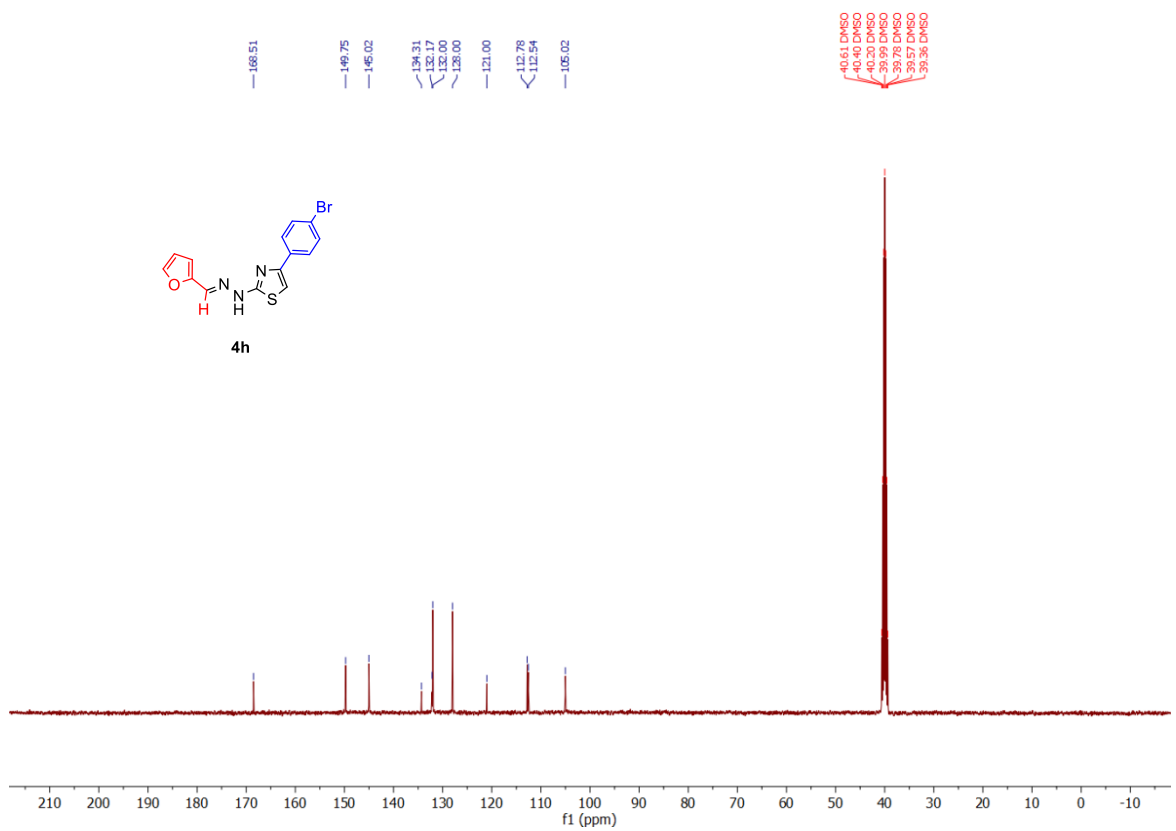

# $^1\text{H}$ and $^{13}\text{C}$ NMR spectra of 4i

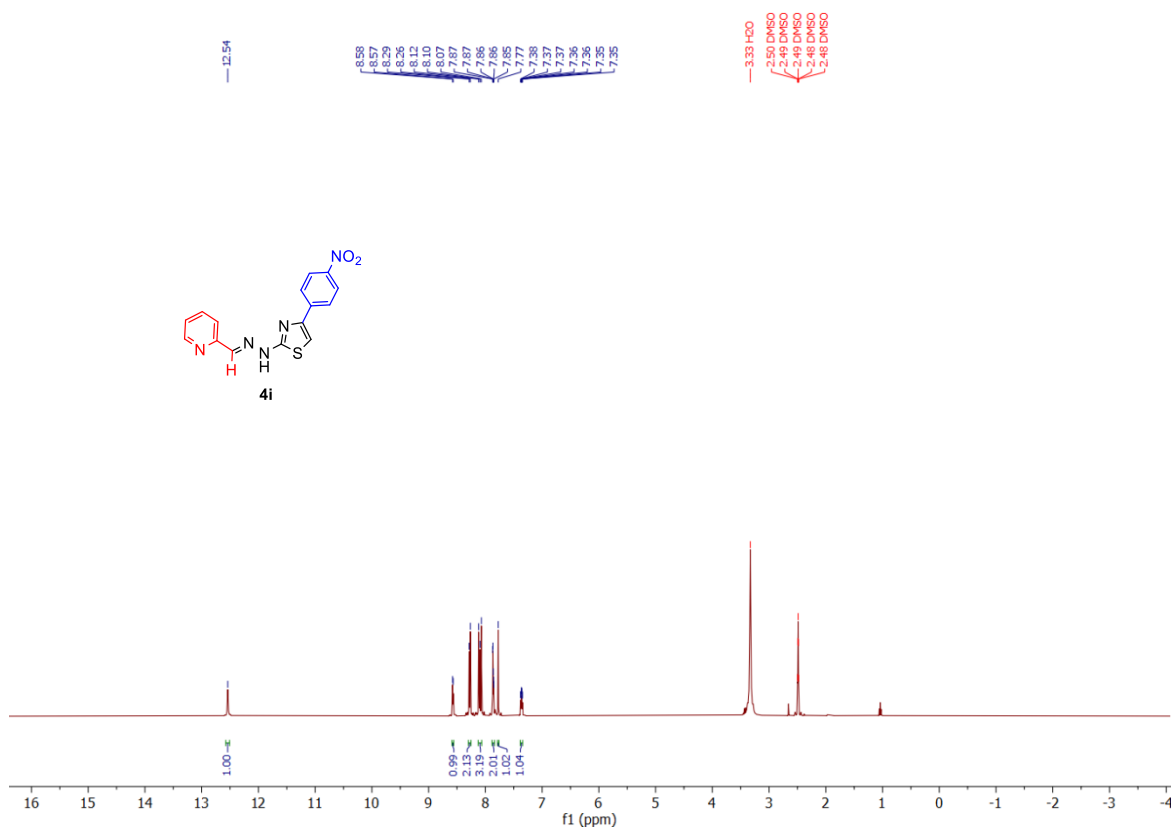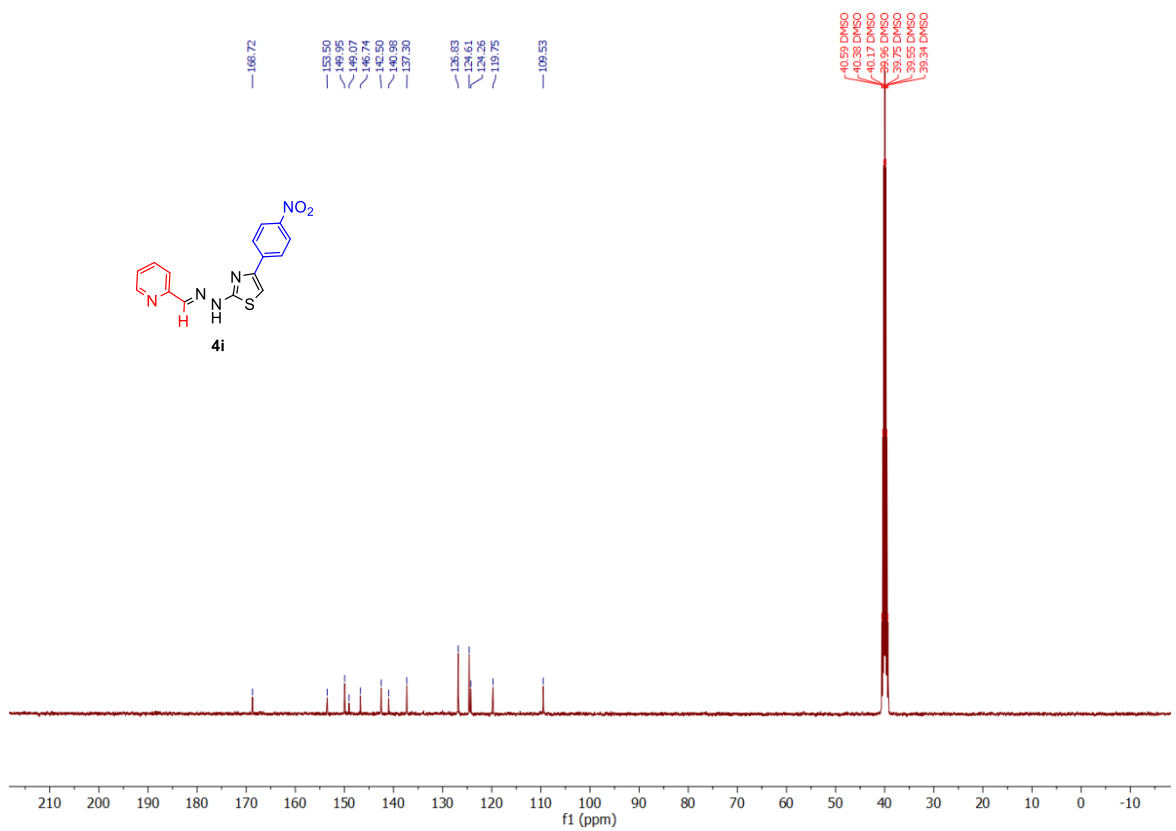

# $^1\text{H}$ and $^{13}\text{C}$ NMR spectra of 4j

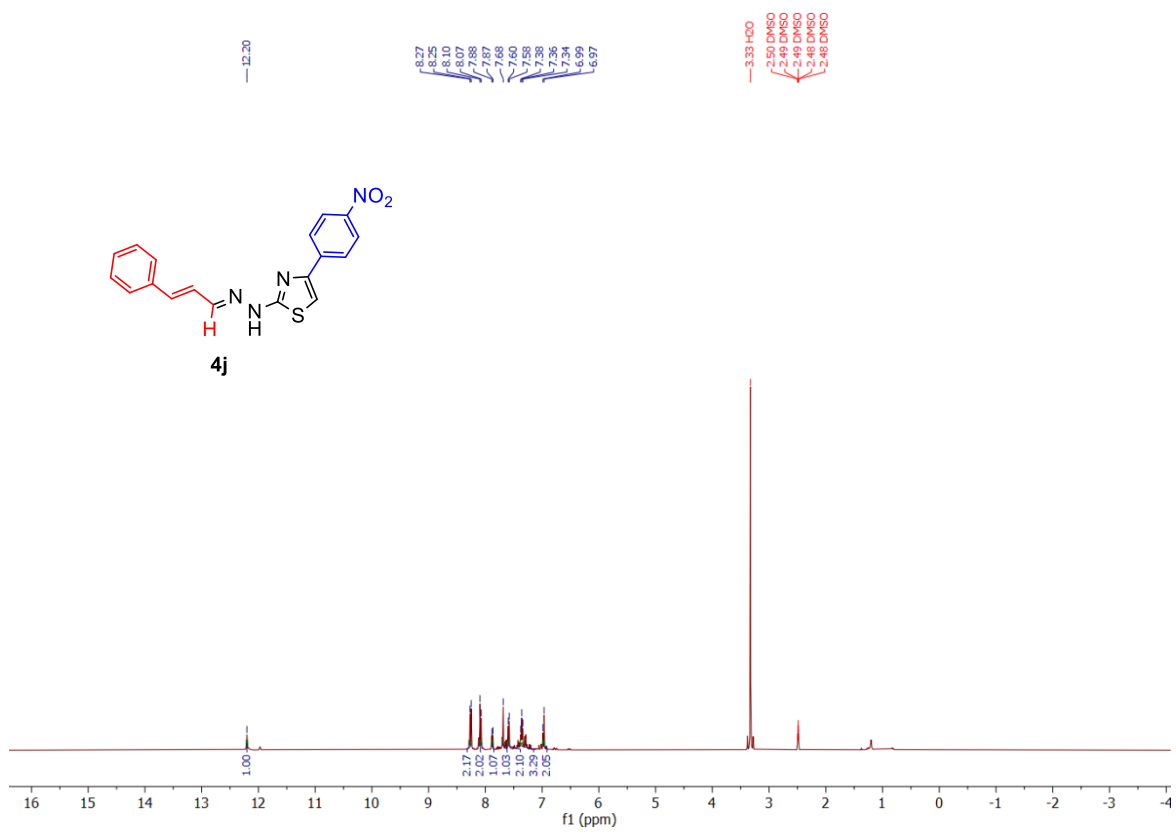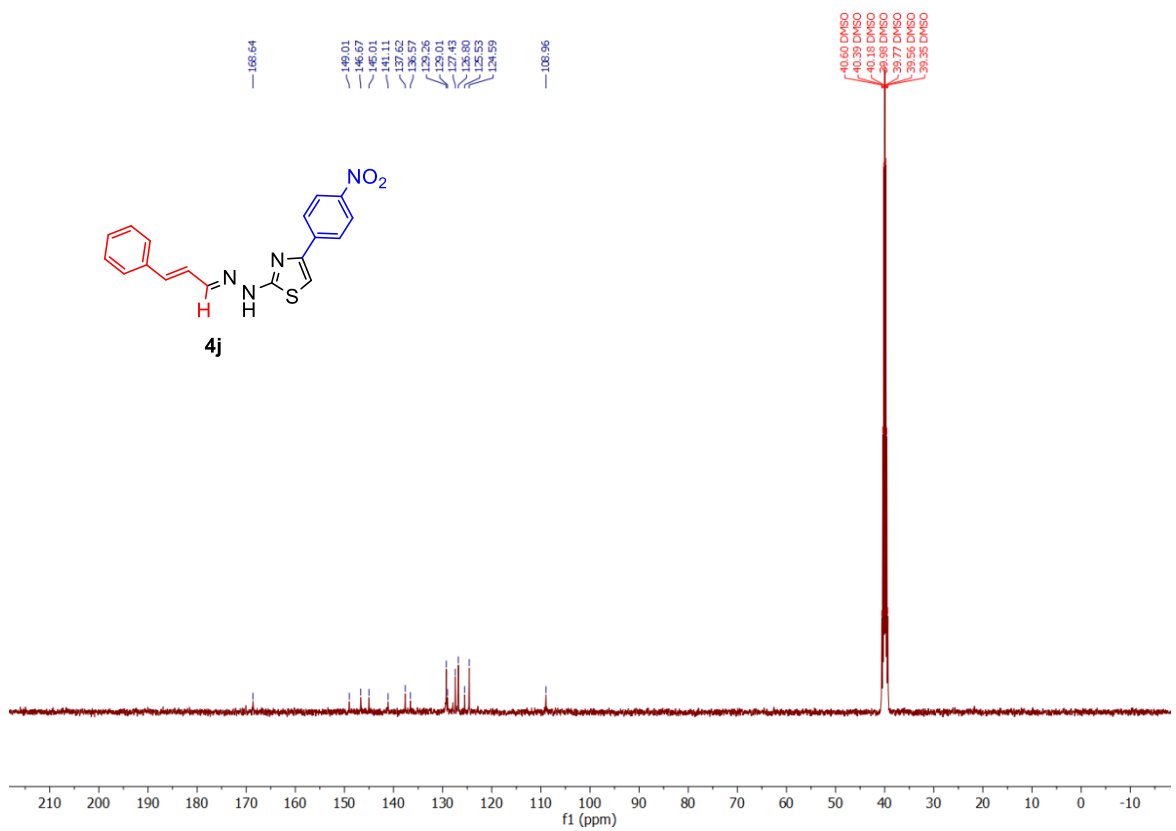



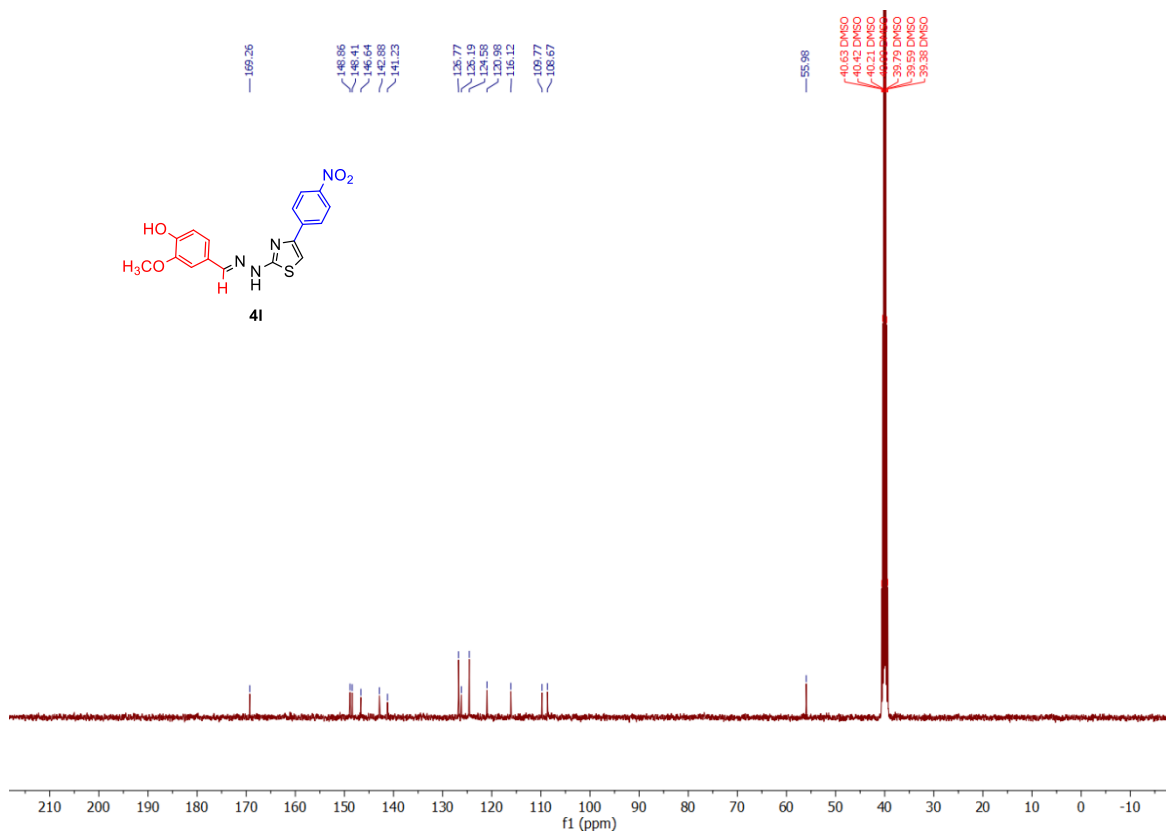

**<sup>1</sup>H and <sup>13</sup>C NMR spectra of 4m**

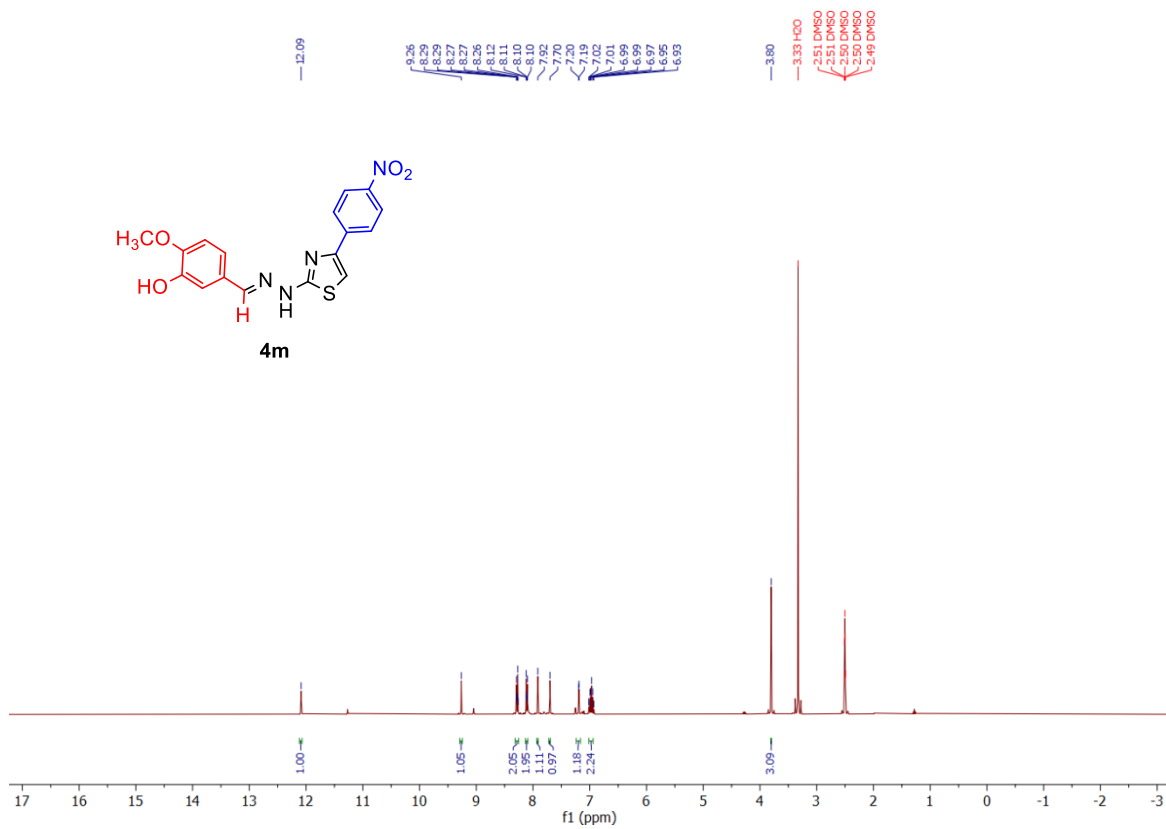



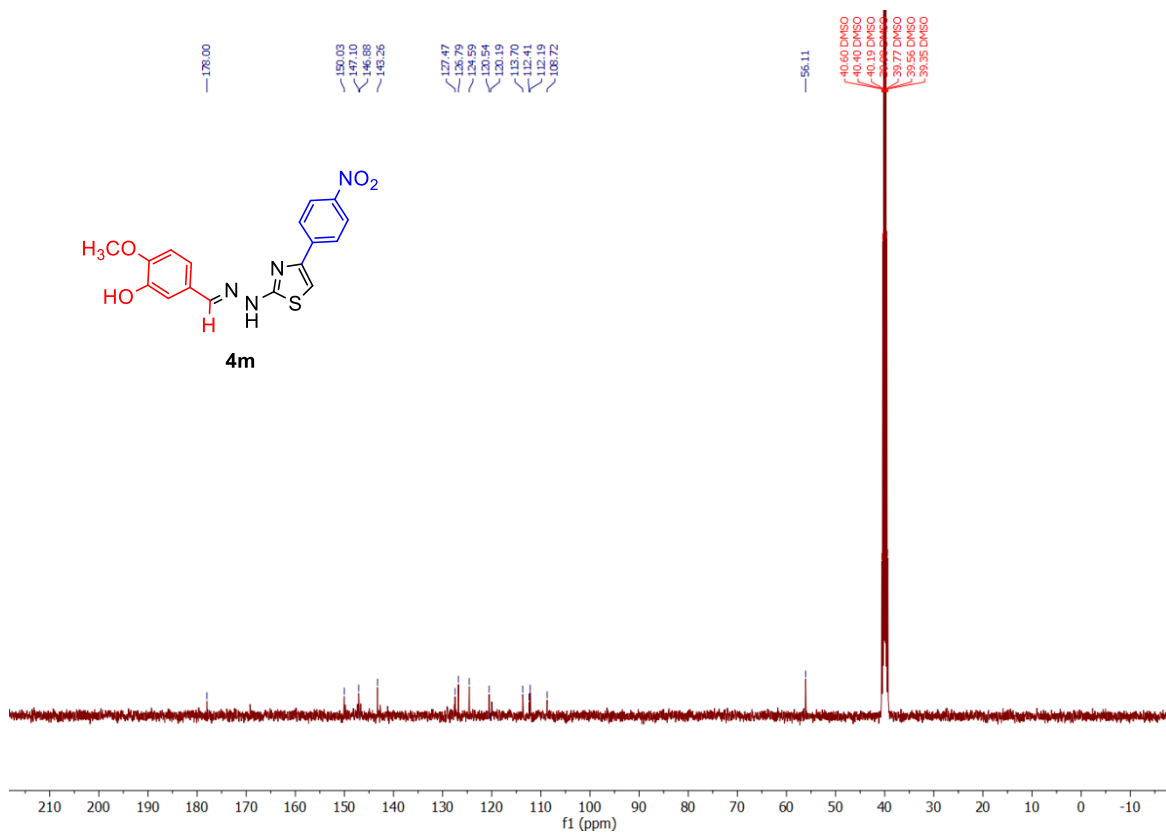

**<sup>1</sup>H and <sup>13</sup>C NMR spectra of 4n**

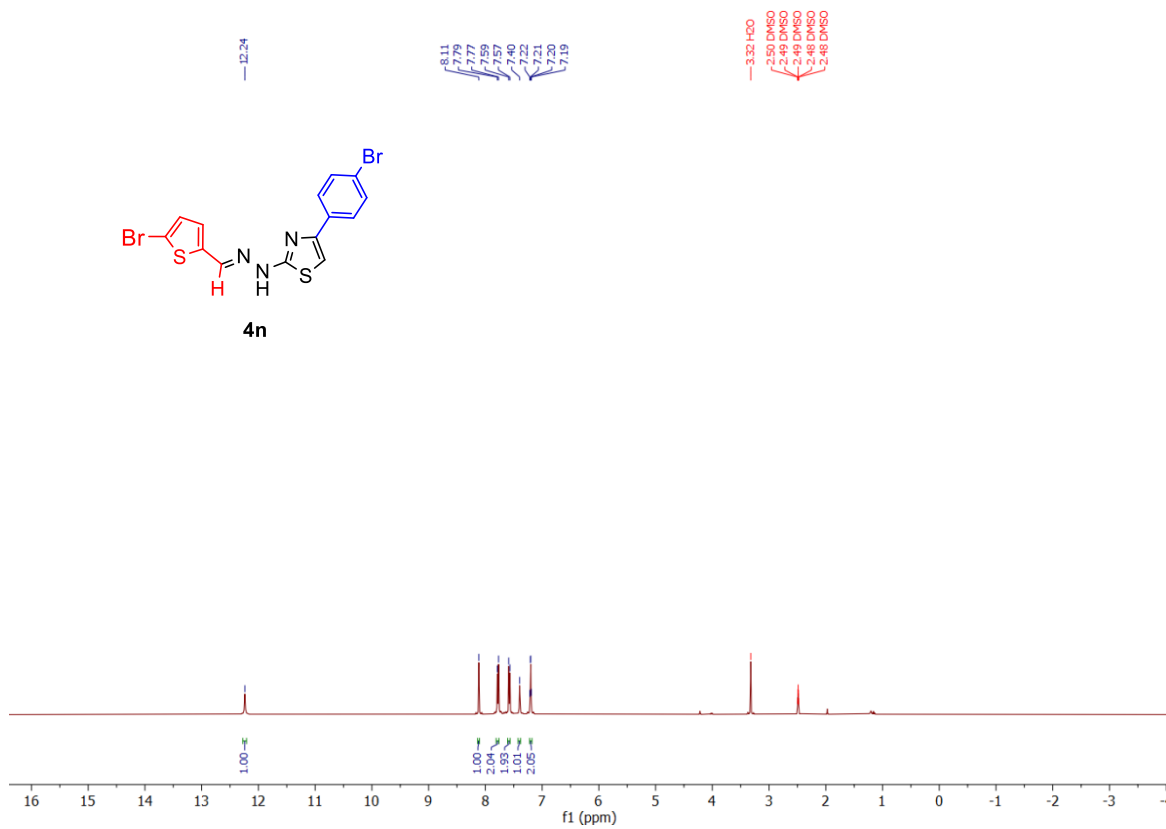

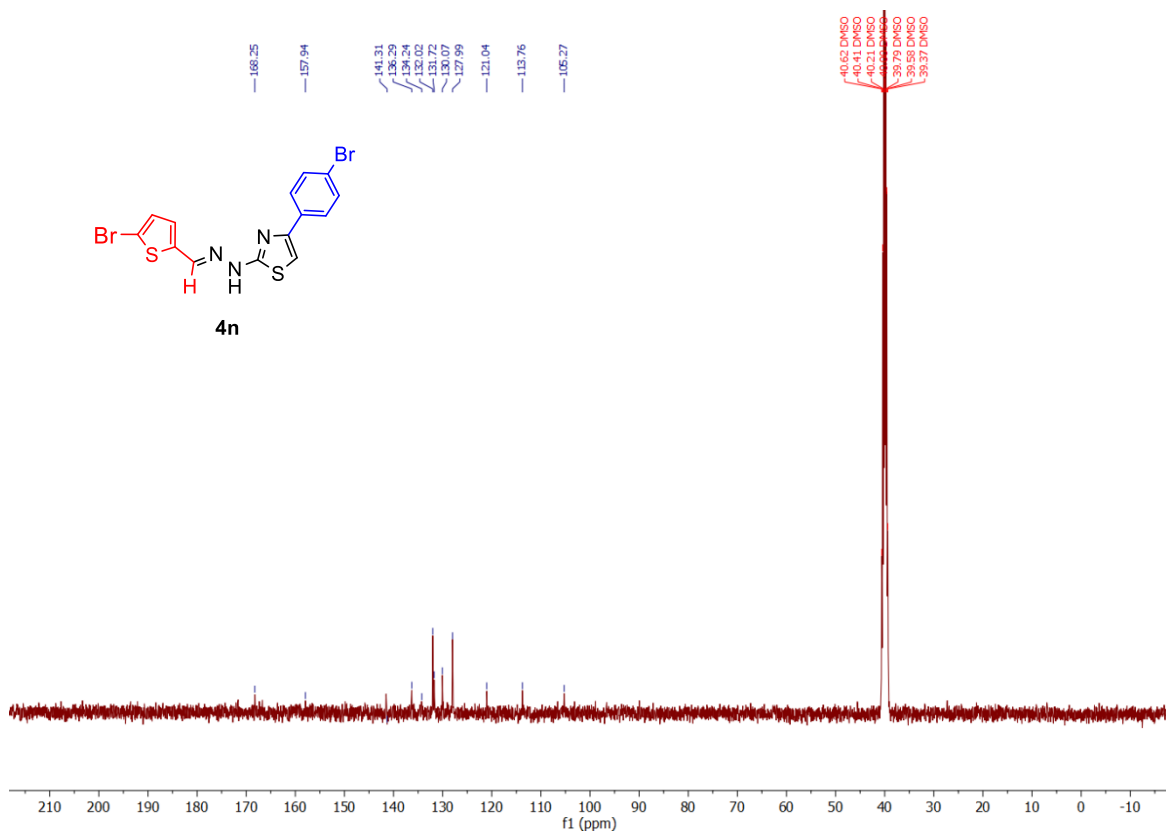

**<sup>1</sup>H and <sup>13</sup>C NMR spectra of 4o**

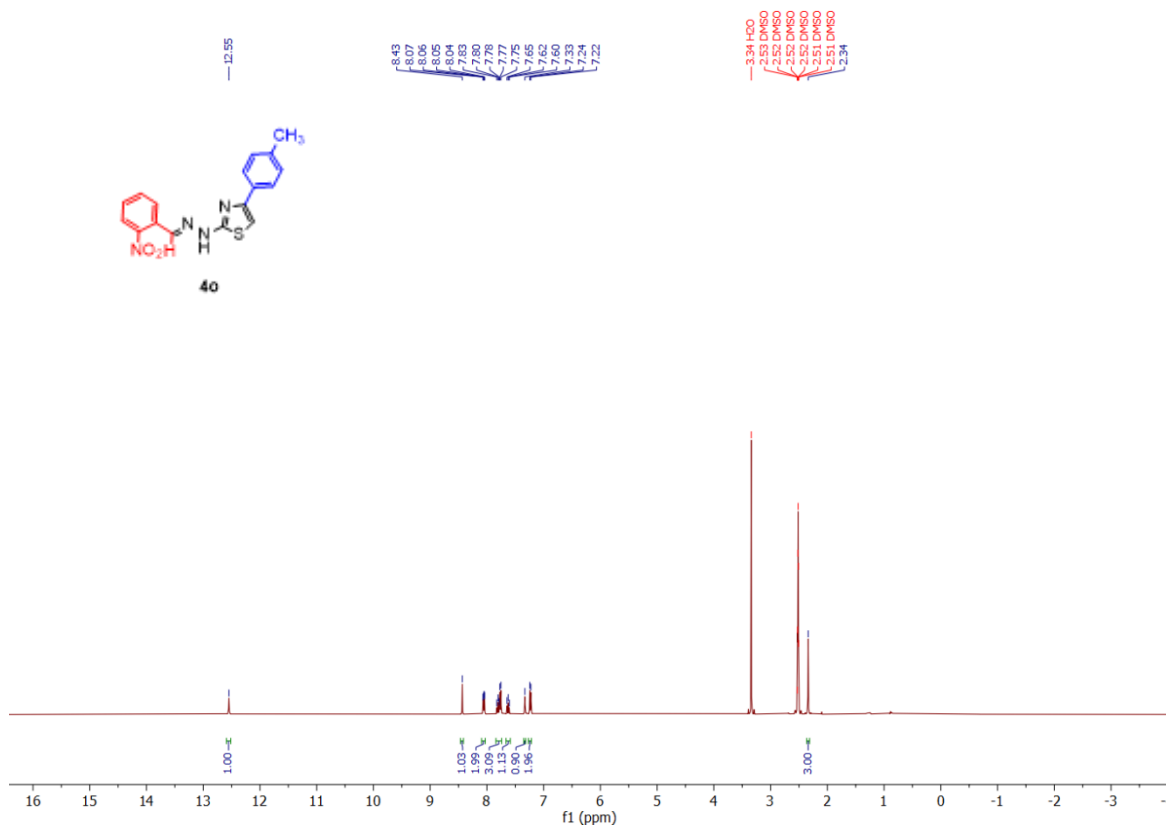

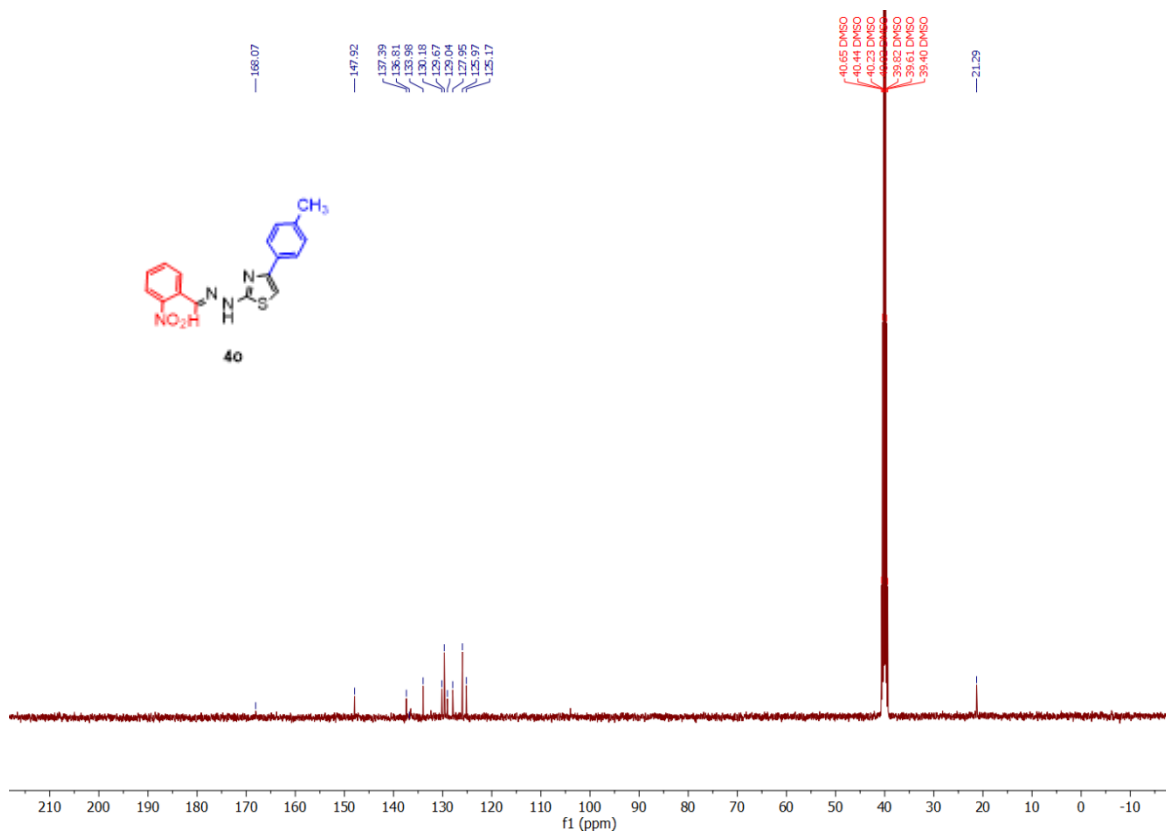

**<sup>1</sup>H and <sup>13</sup>C NMR spectra of 4p**

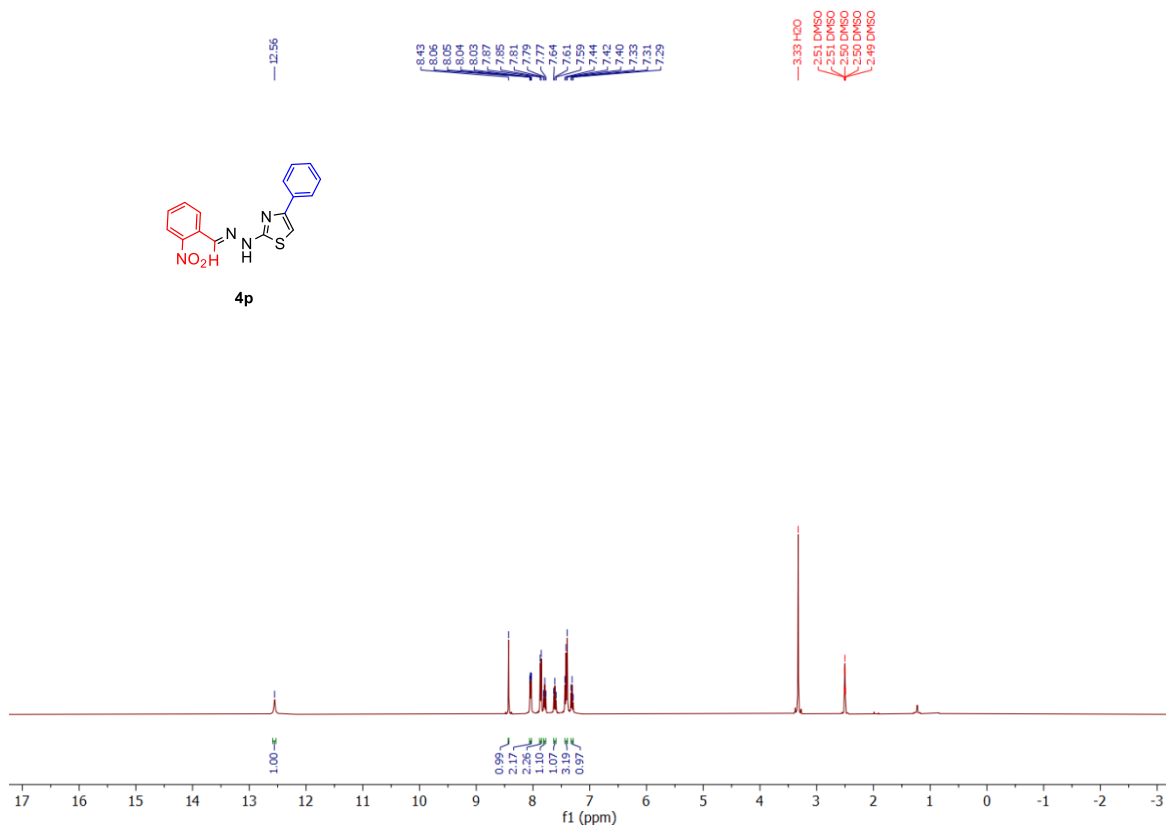

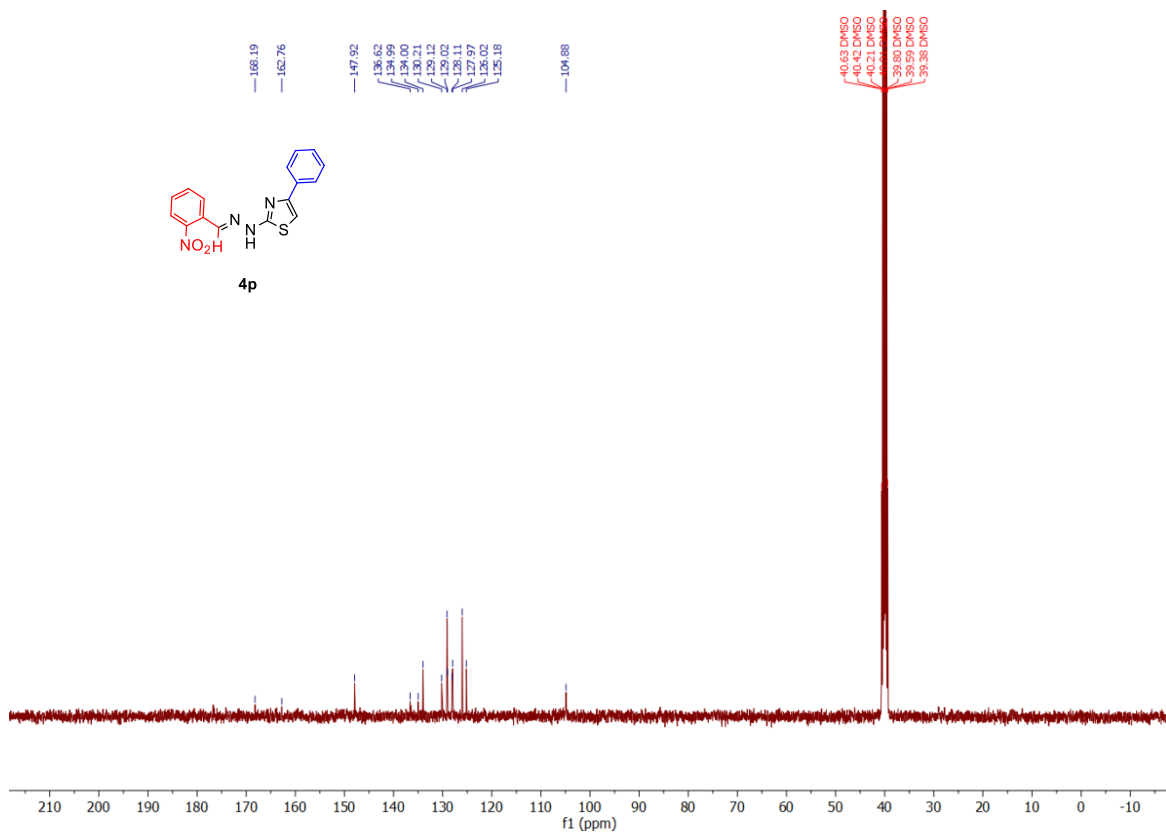

**<sup>1</sup>H NMR spectra of 4q**

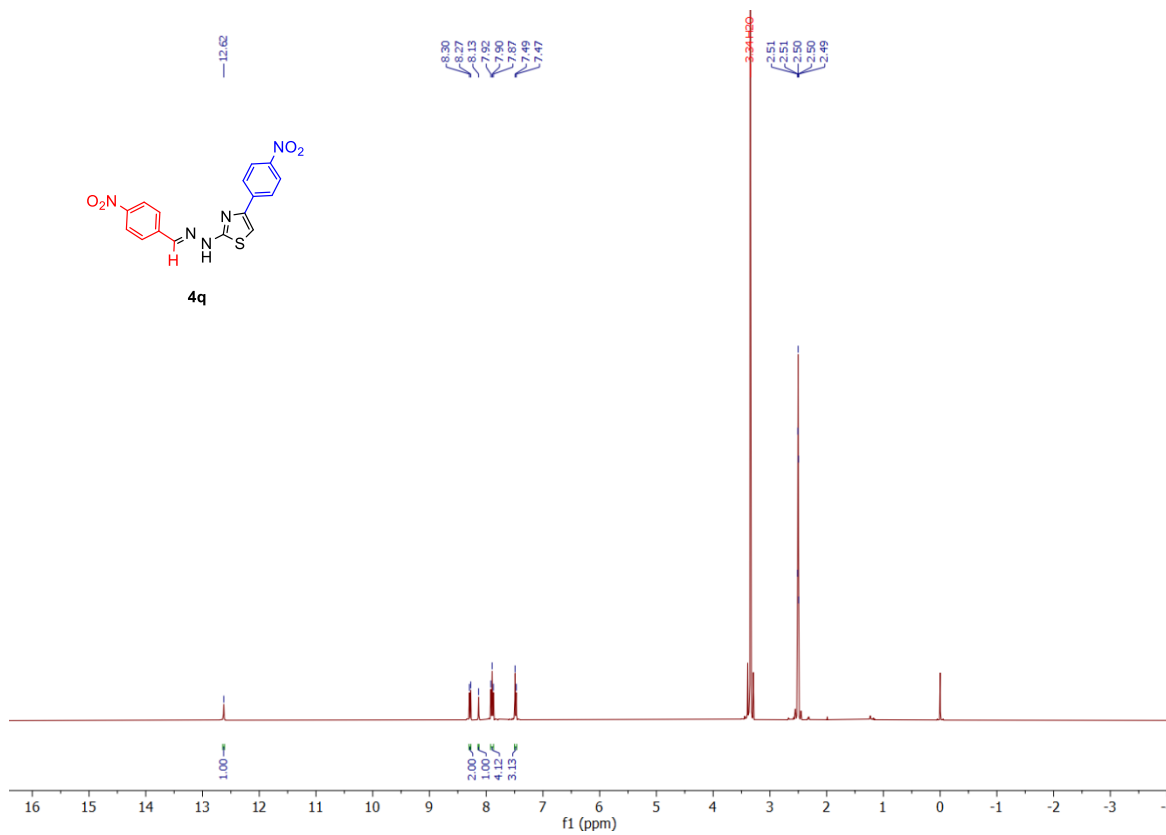

# $^1\text{H}$ and $^{13}\text{C}$ NMR spectra of 4r

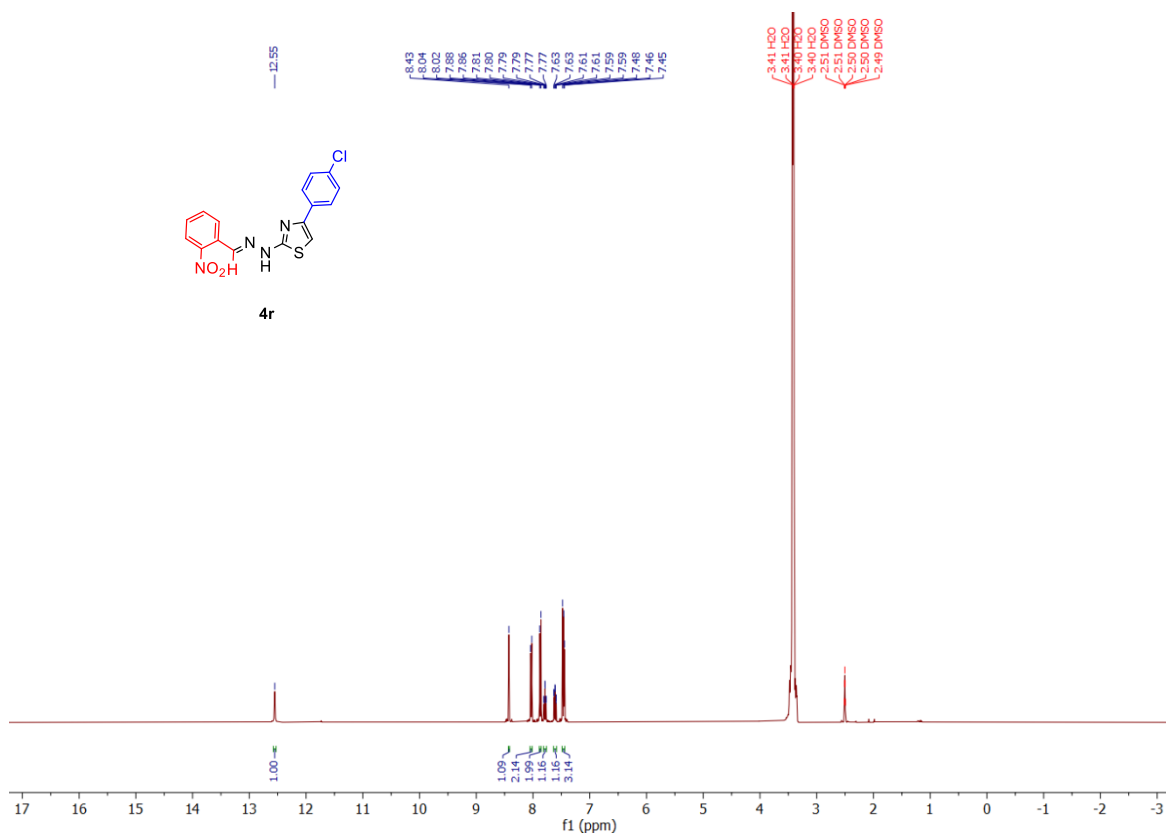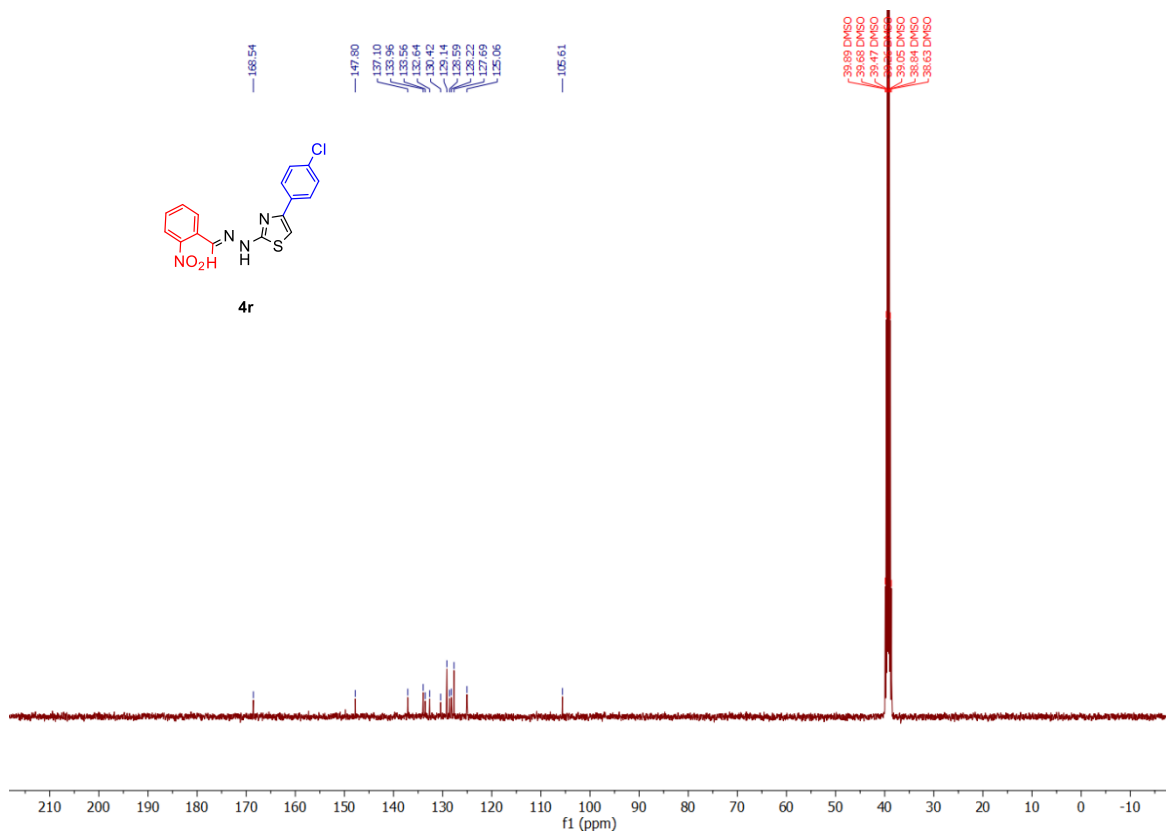

# $^1\text{H}$ and $^{13}\text{C}$ NMR spectra of 4s

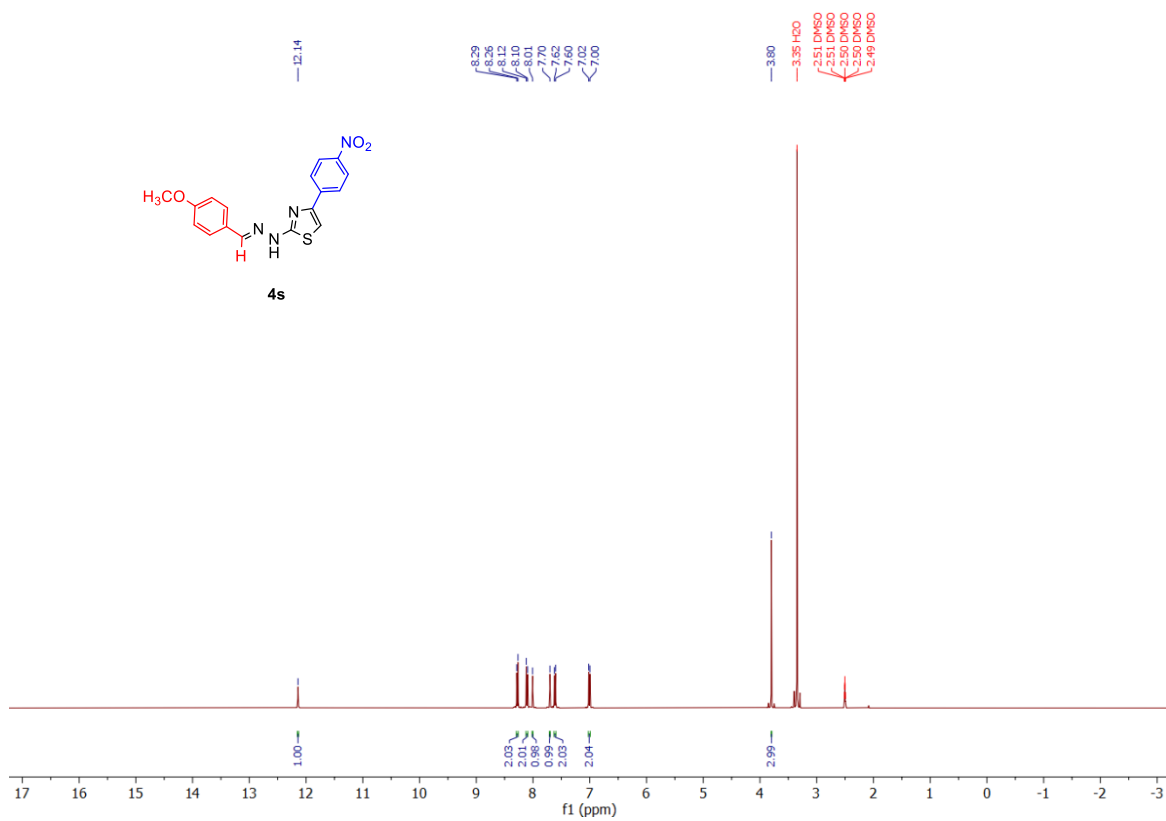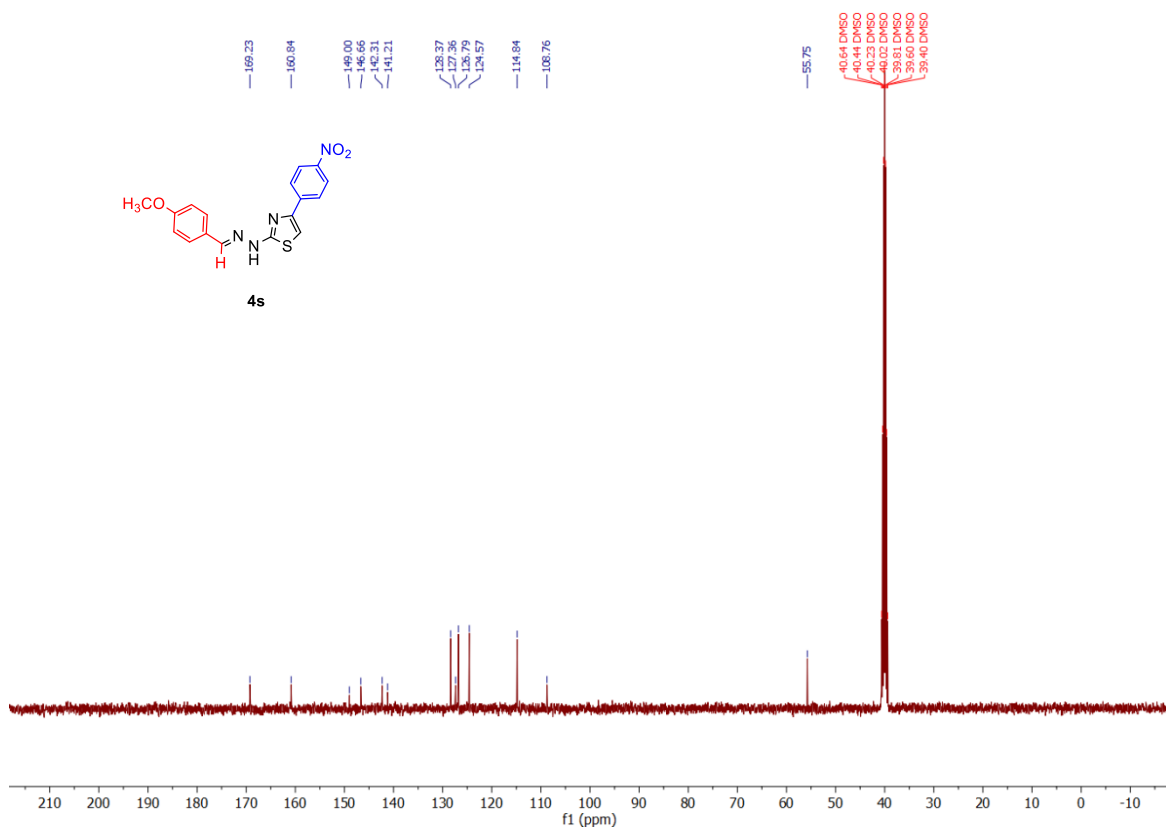

# <sup>1</sup>H NMR spectra of 6a

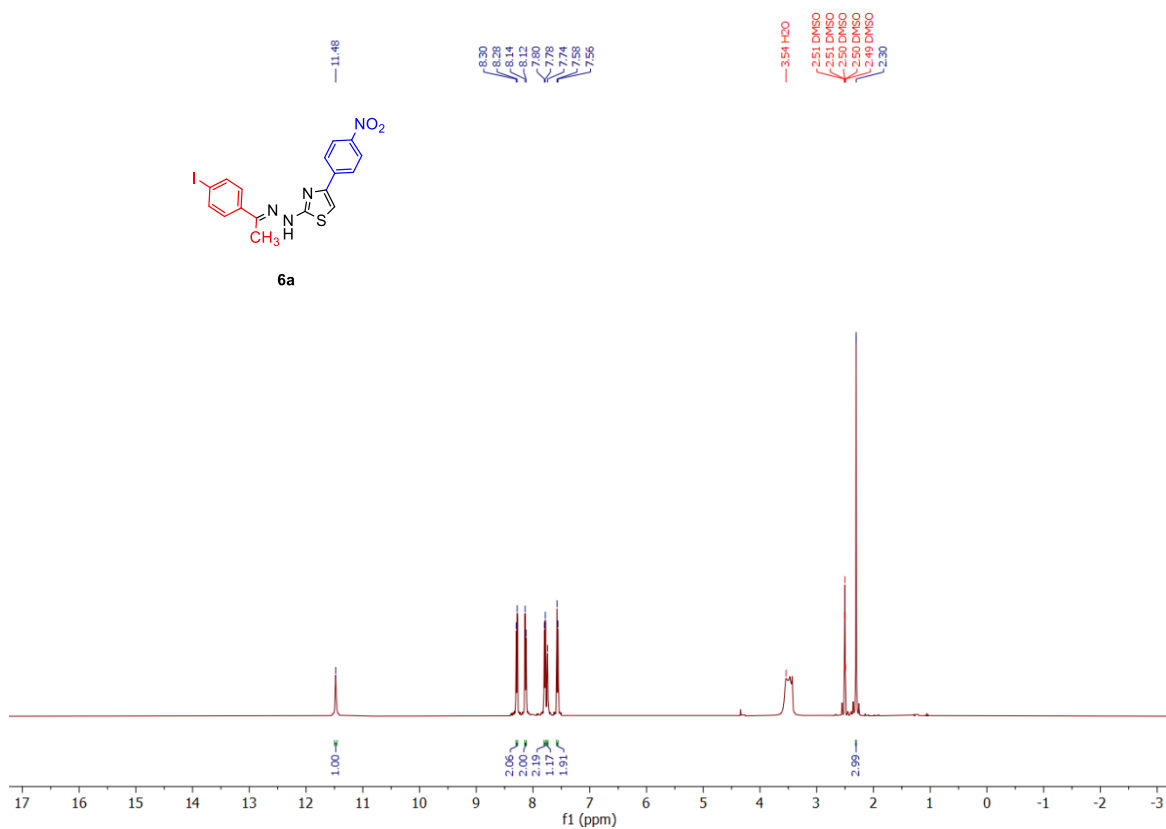

# <sup>1</sup>H and <sup>13</sup>C NMR spectra of 6b

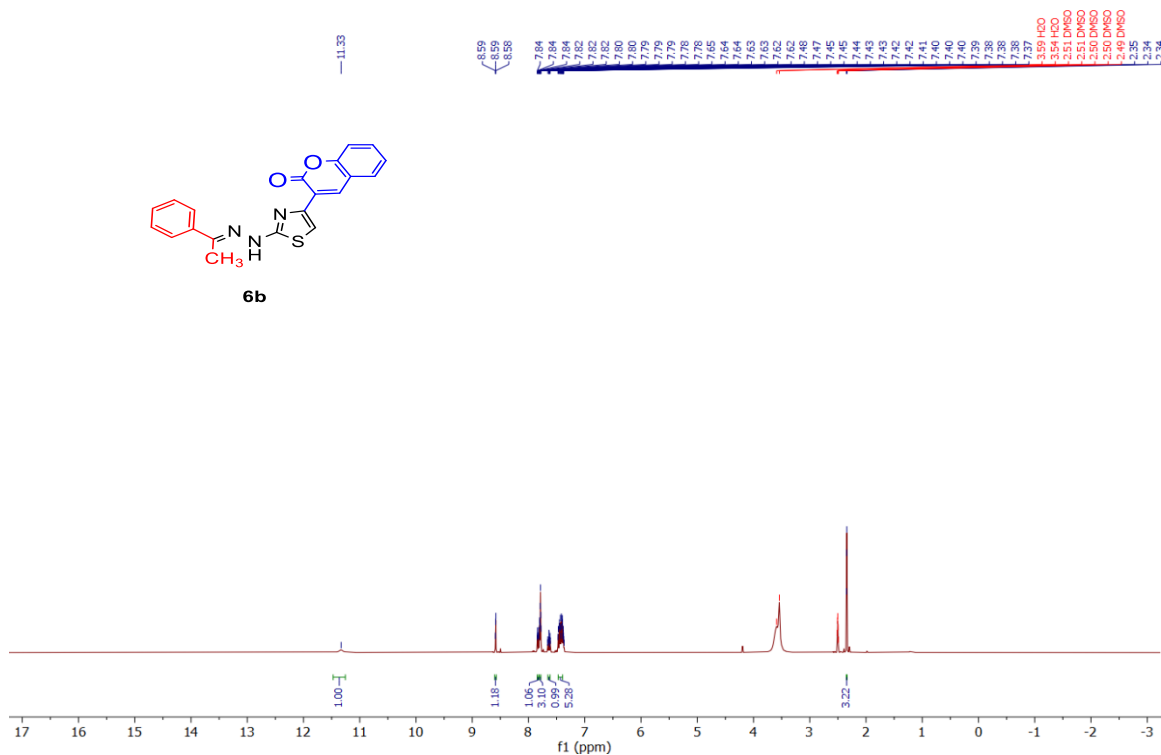

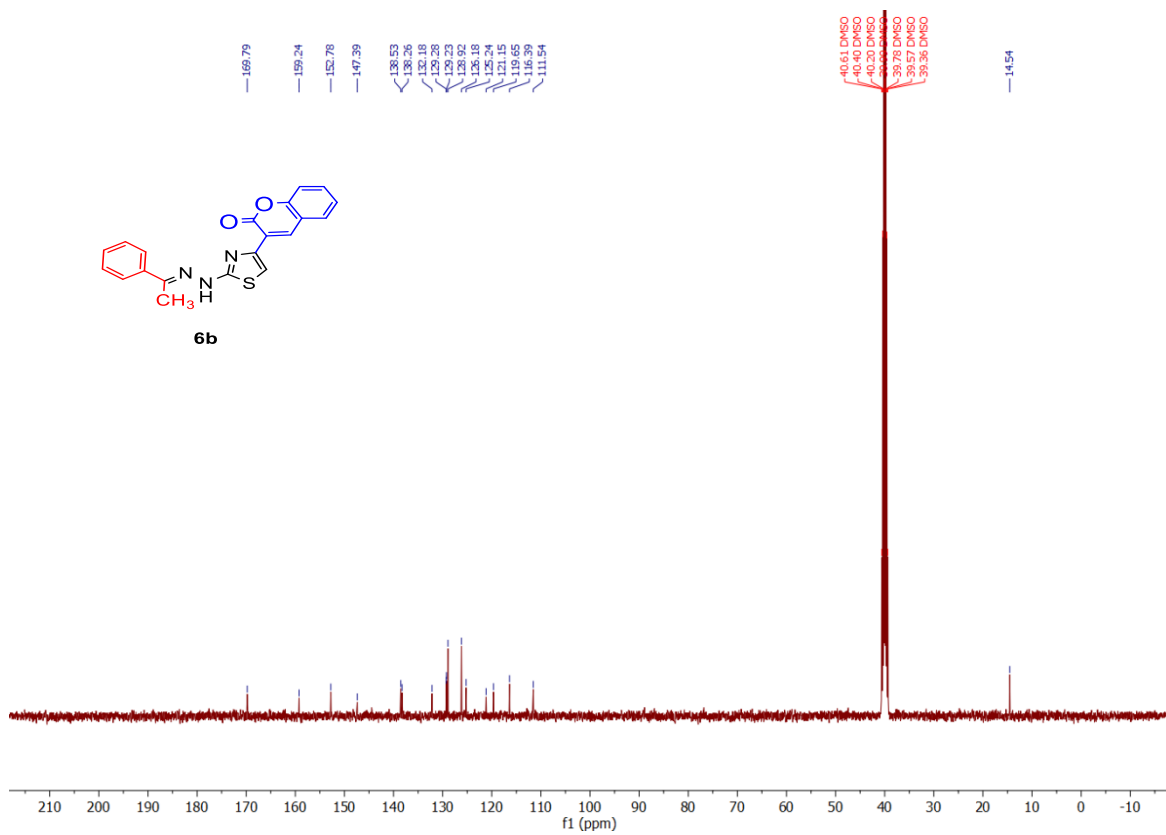

**$^1\text{H}$  and  $^{13}\text{C}$  NMR spectra of **6c****

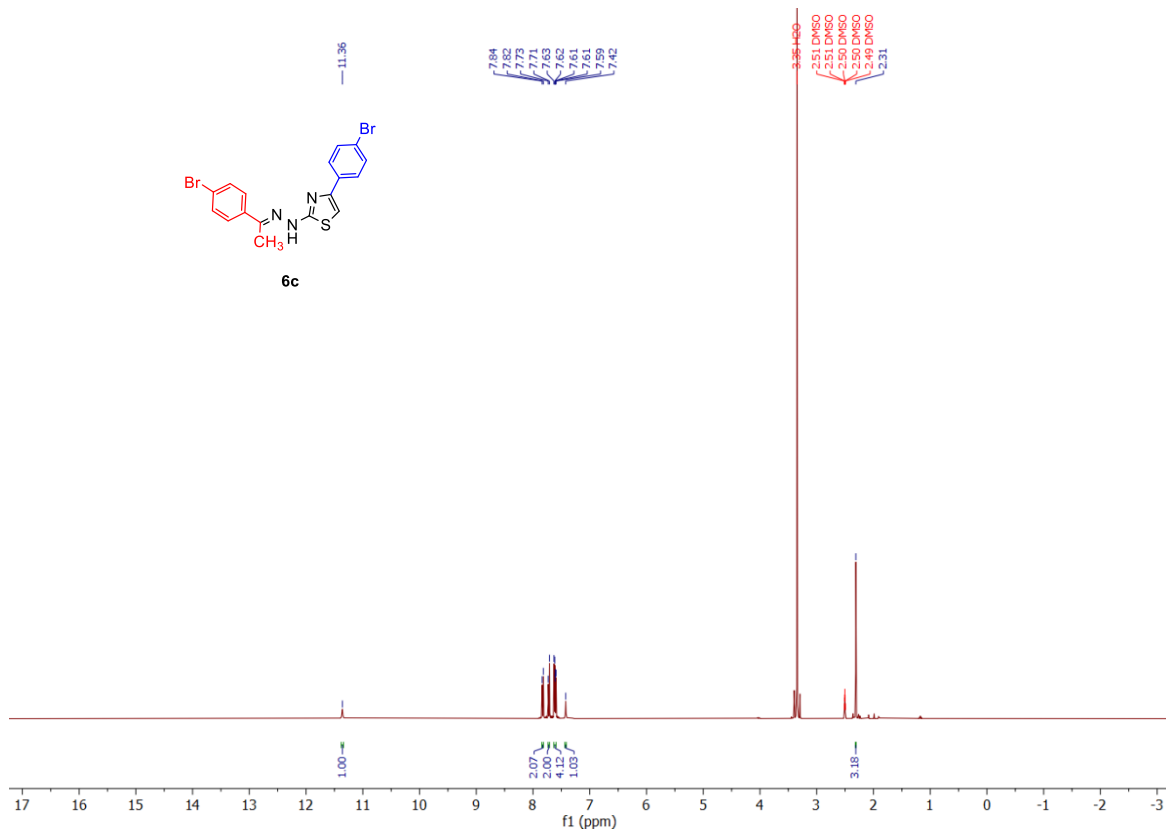





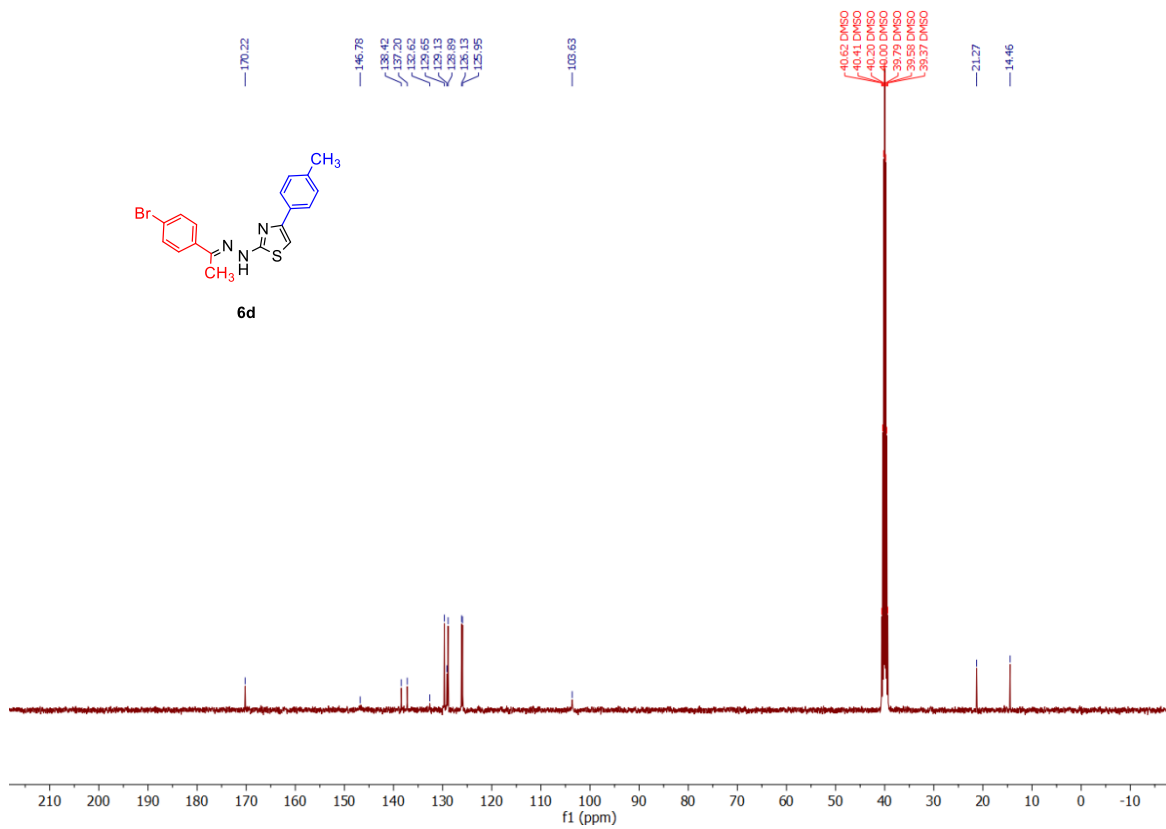

### <sup>1</sup>H and <sup>13</sup>C NMR spectra of 6e

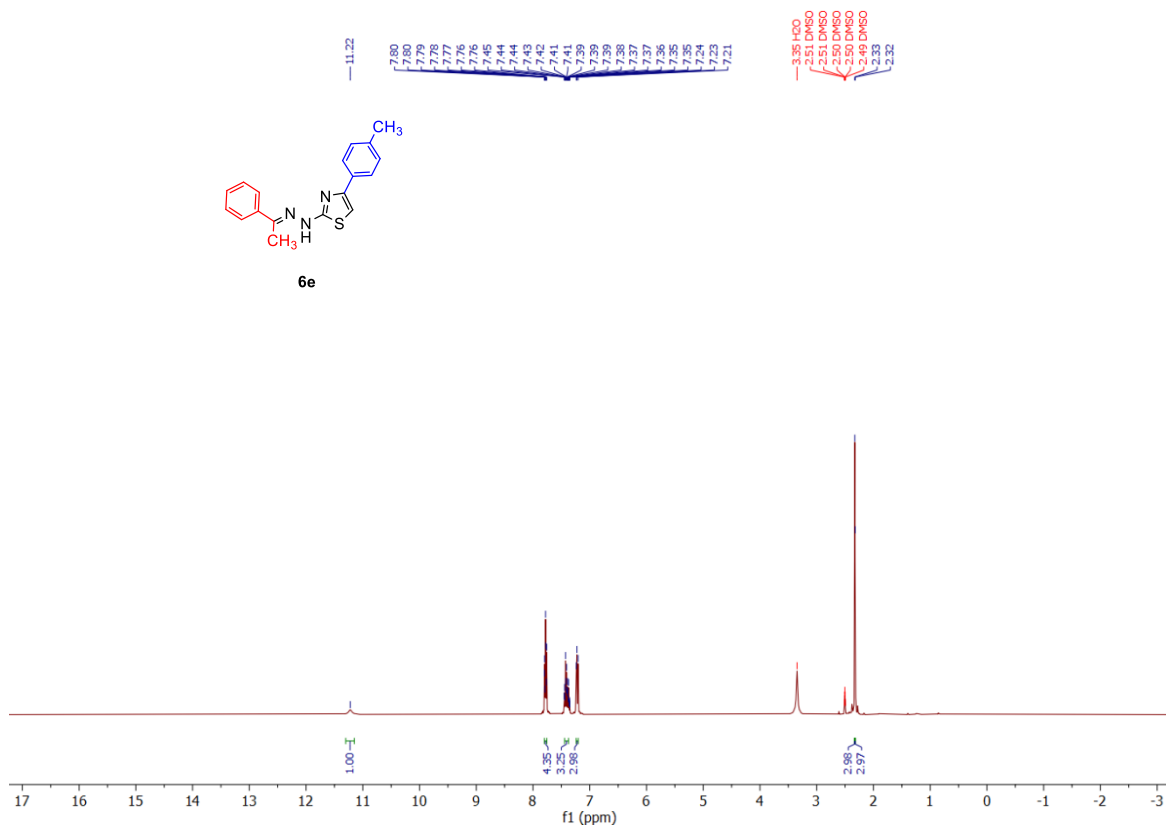

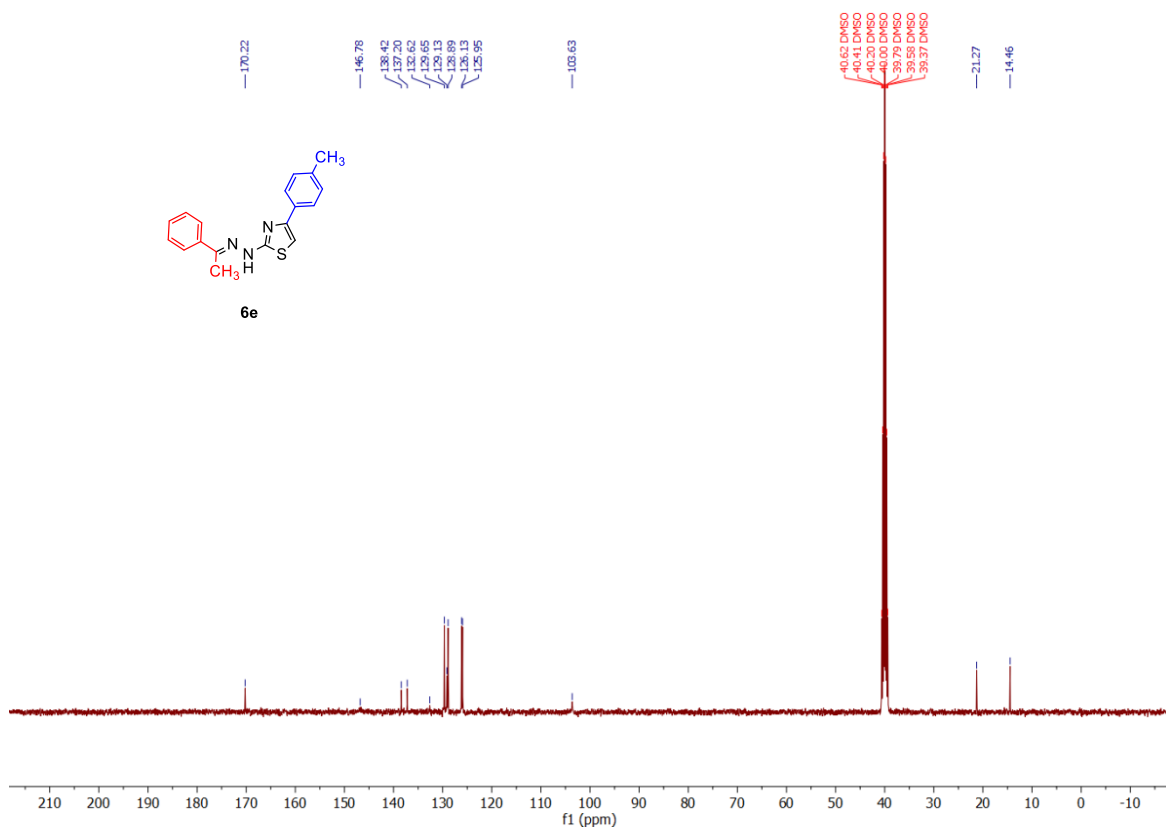

**<sup>1</sup>H and <sup>13</sup>C NMR spectra of 6f**

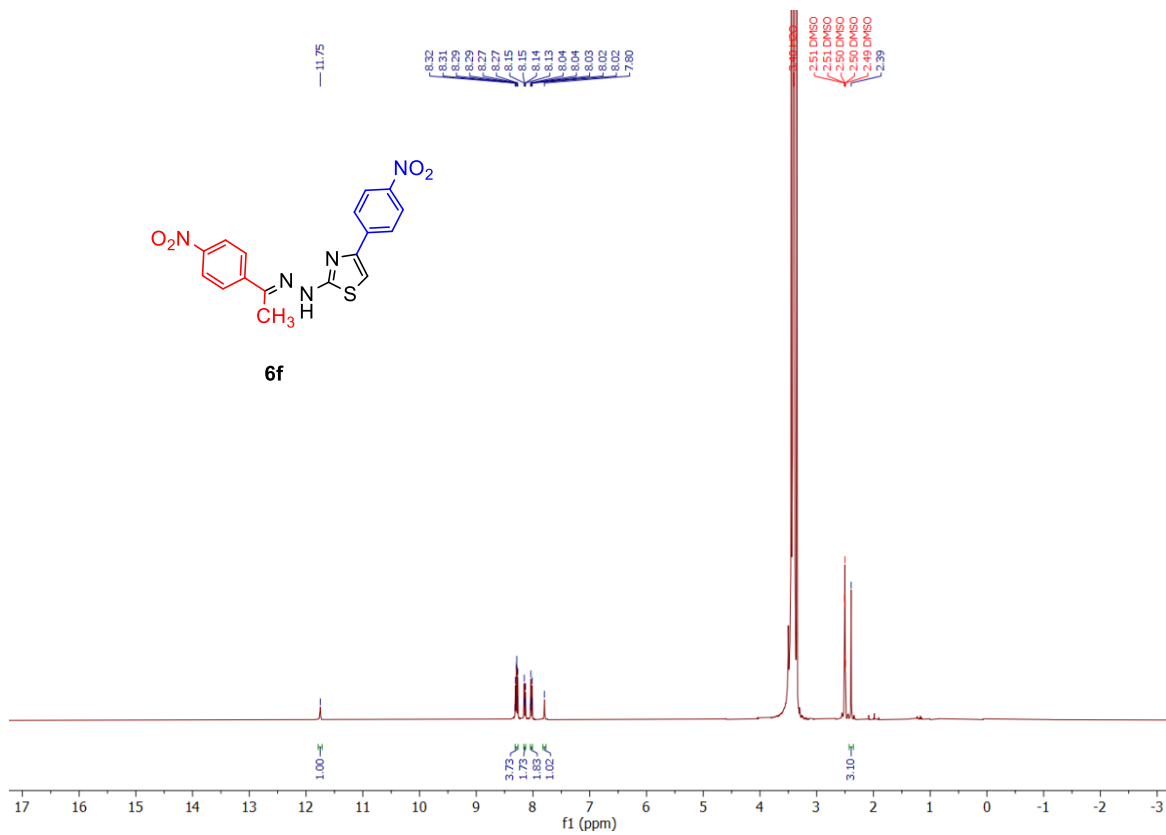





# <sup>1</sup>H NMR spectra of 6i

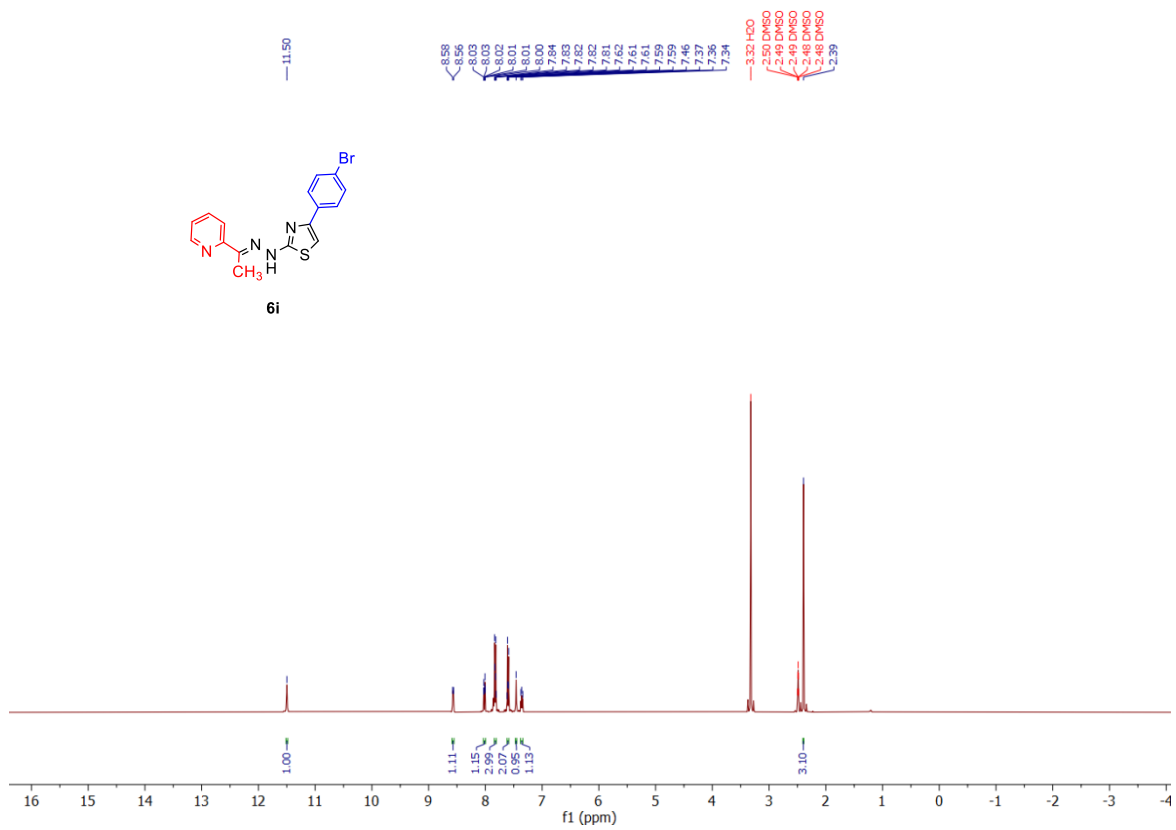

# <sup>1</sup>H and <sup>13</sup>C NMR spectra of 6j

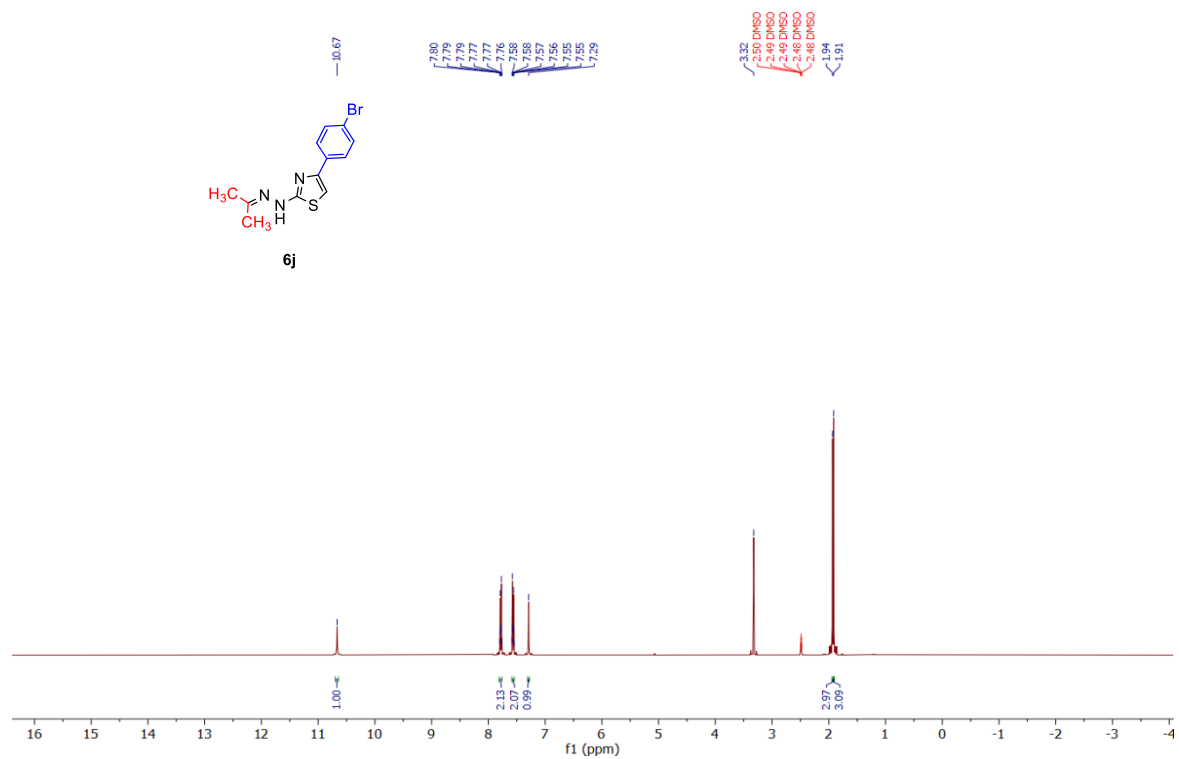

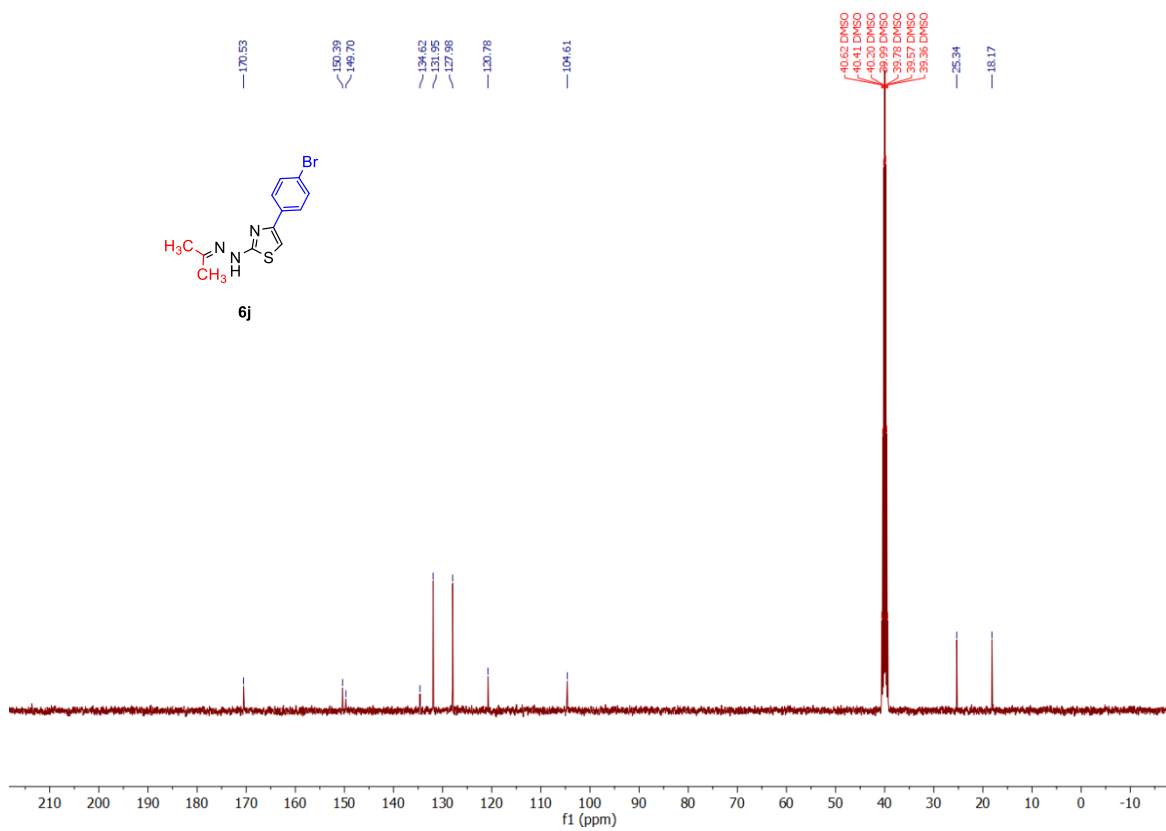

**<sup>1</sup>H and <sup>13</sup>C NMR spectra of 6k**

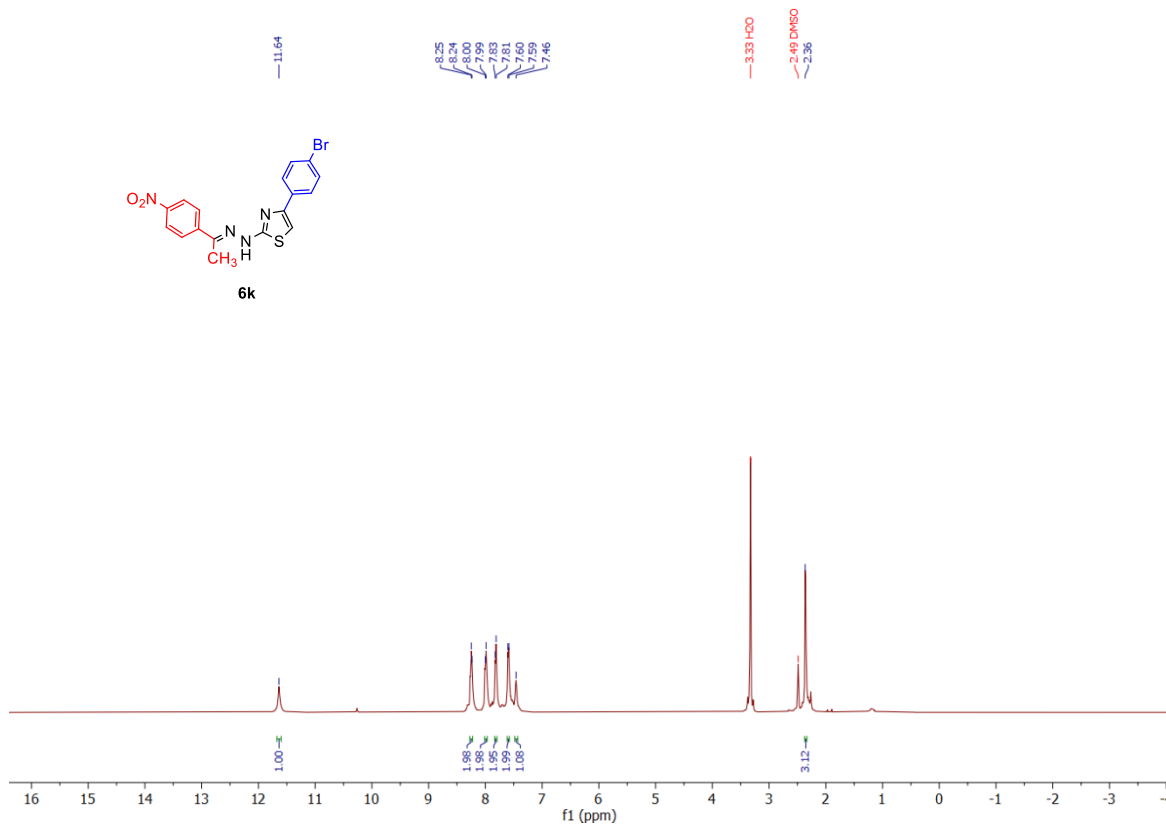

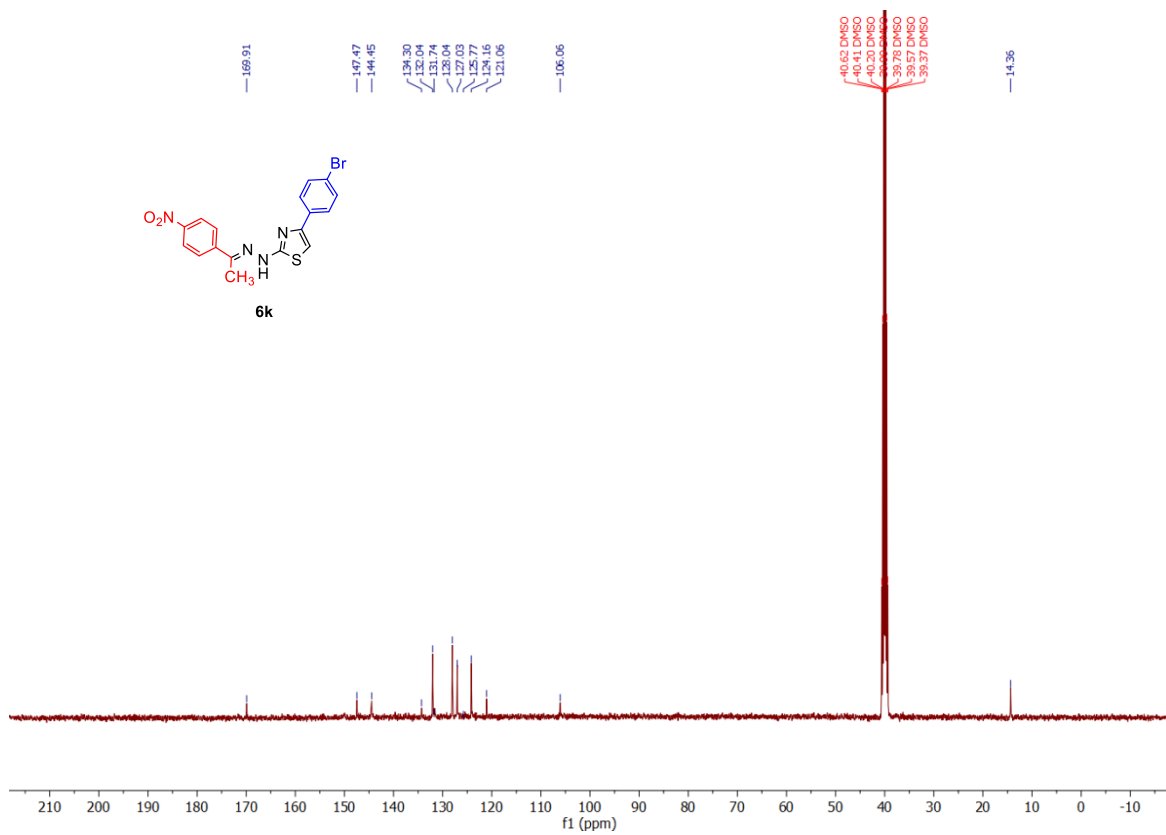

**<sup>1</sup>H and <sup>13</sup>C NMR spectra of 6l**

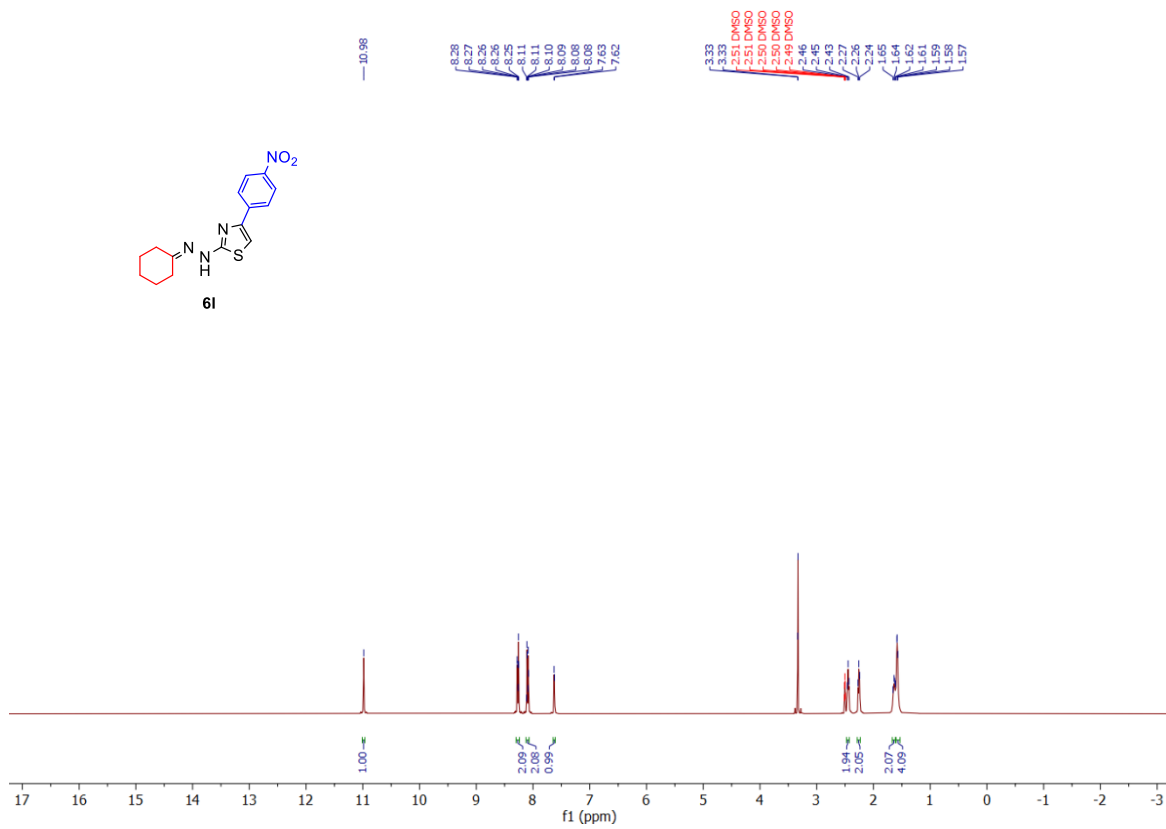



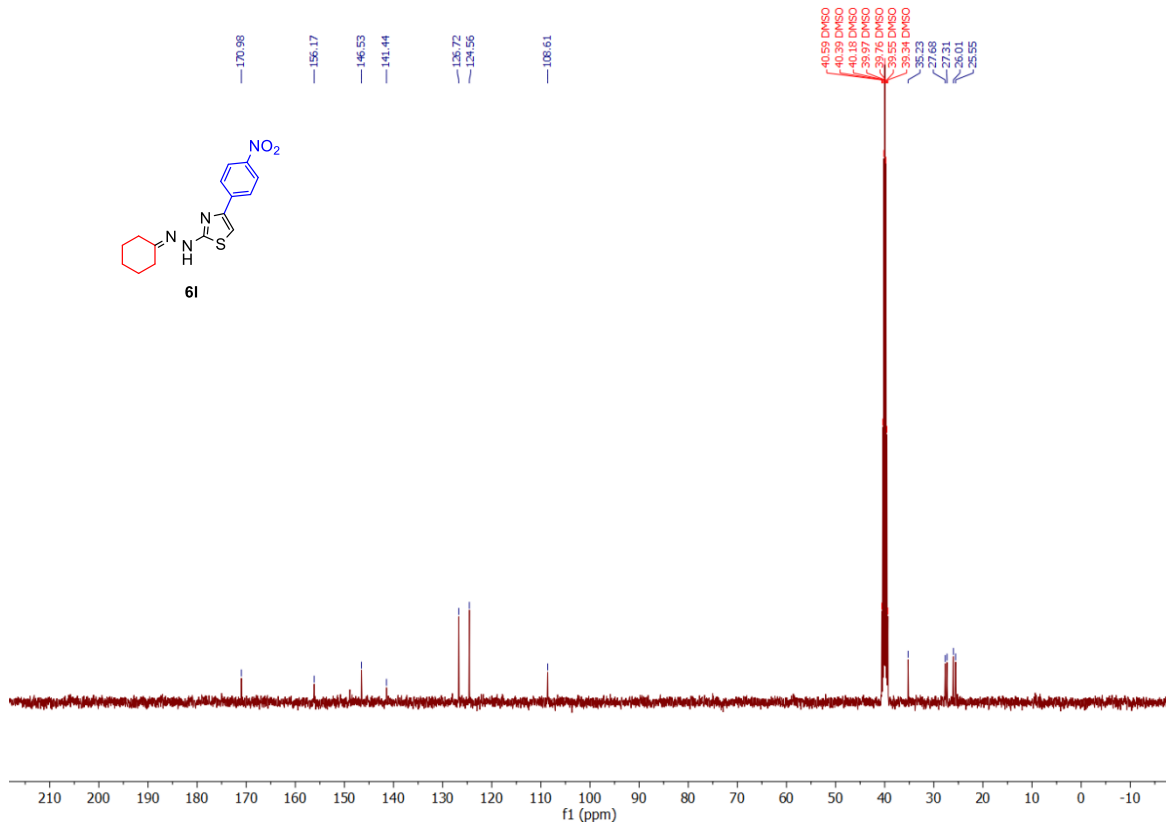

**<sup>1</sup>H and <sup>13</sup>C NMR spectra of 6m**

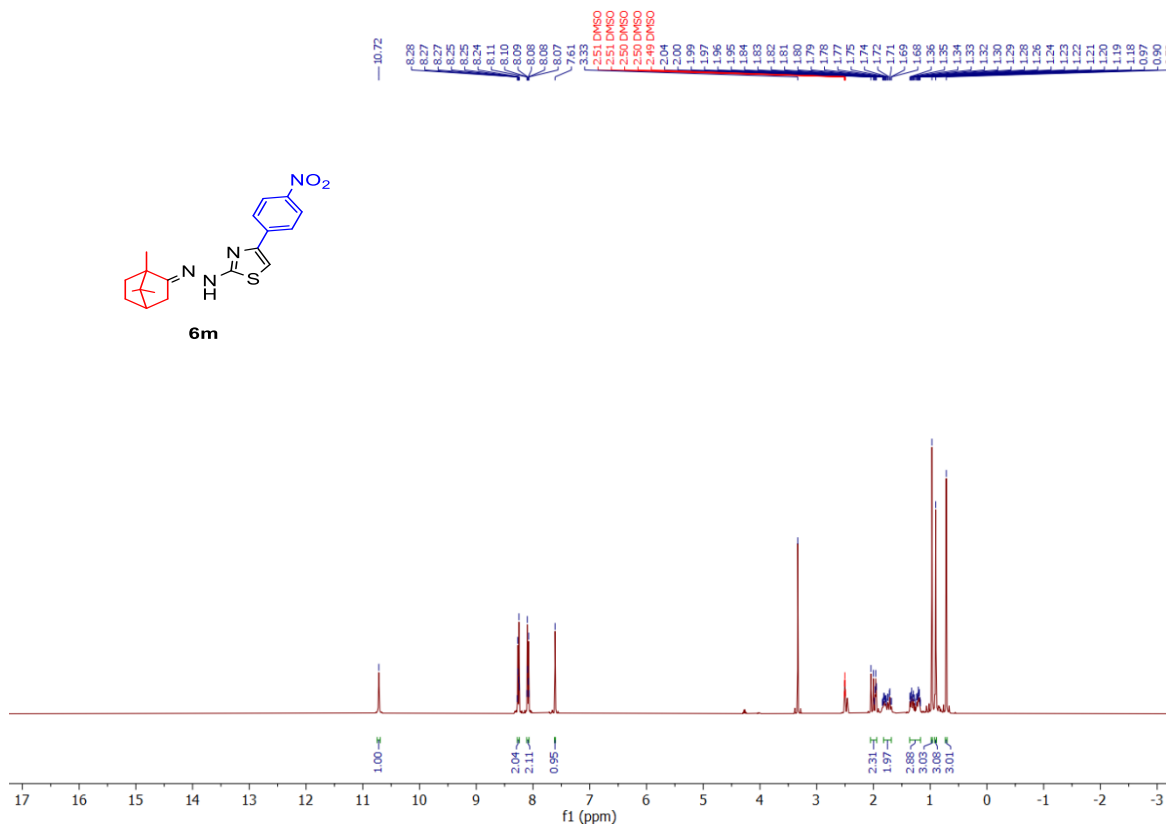

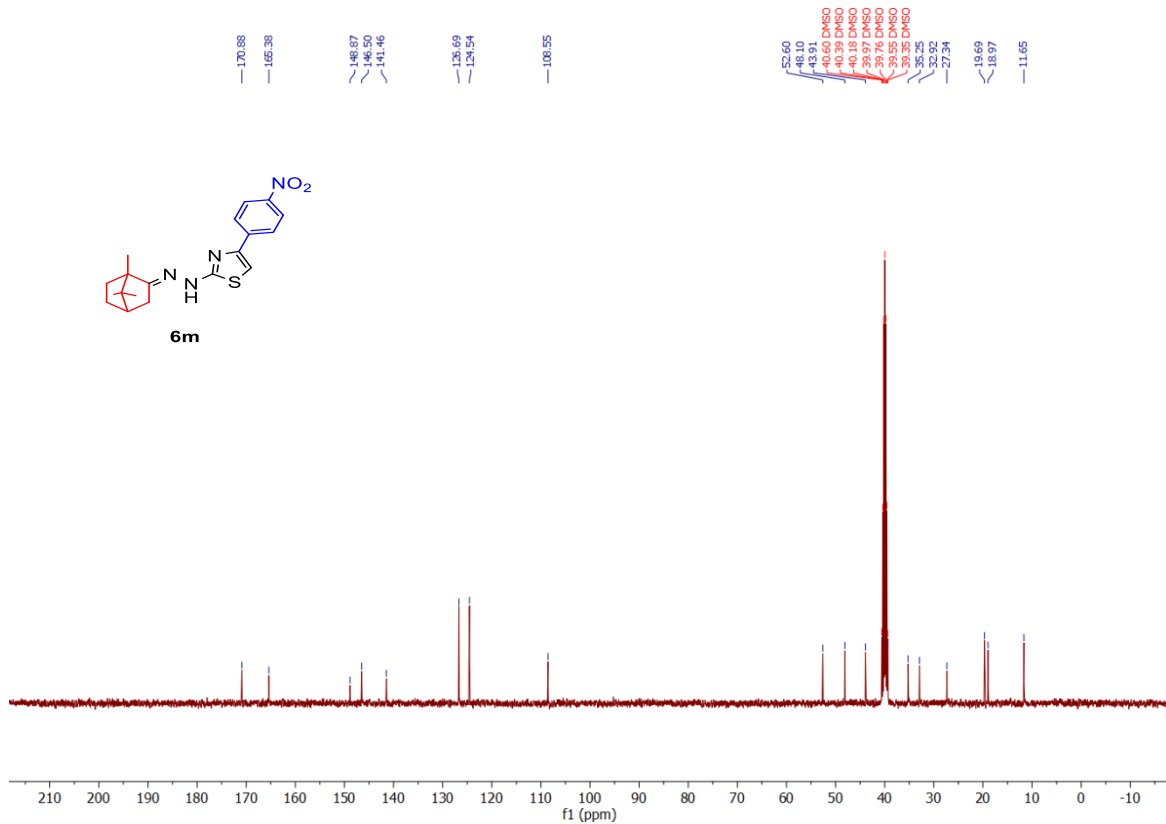

### <sup>1</sup>H NMR spectra of G

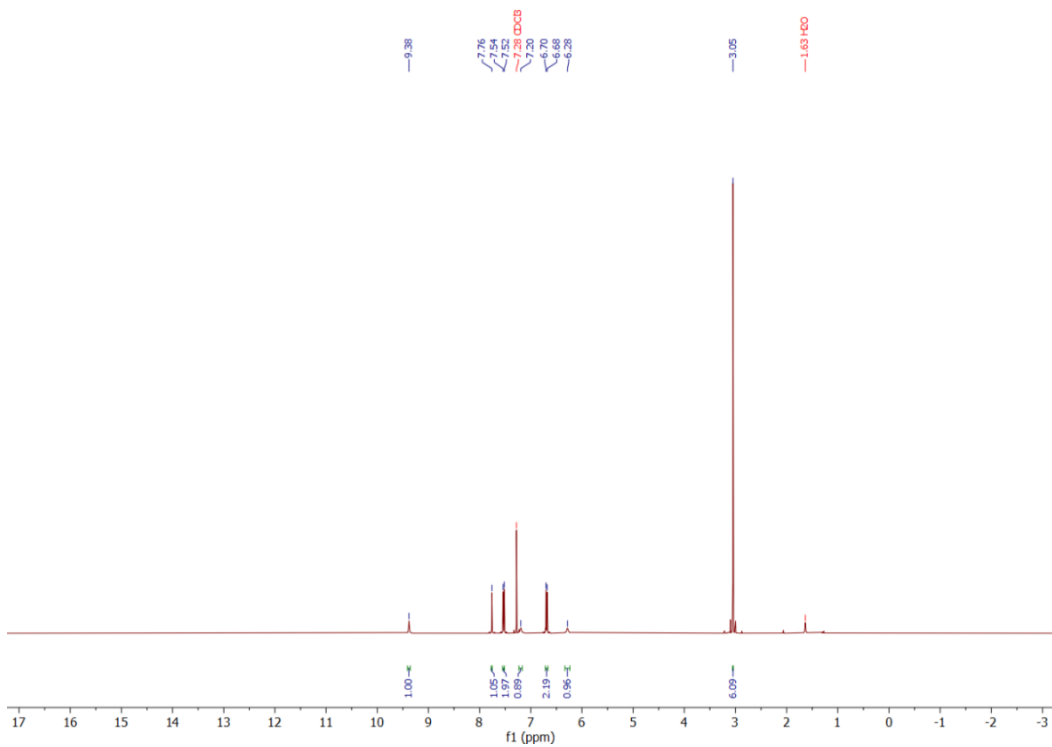

## Crystallographic experimental data

**Table 1. Crystal data and structure refinement for 4a**

|                                             |                                                                               |
|---------------------------------------------|-------------------------------------------------------------------------------|
| Identification code                         | KSK-SD 16                                                                     |
| Empirical formula                           | C <sub>54</sub> H <sub>51</sub> N <sub>15</sub> O <sub>6</sub> S <sub>3</sub> |
| Formula weight                              | 1102.28                                                                       |
| Temperature/K                               | 298                                                                           |
| Crystal system                              | monoclinic                                                                    |
| Space group                                 | P2 <sub>1</sub> /c                                                            |
| a/Å                                         | 17.3937(2)                                                                    |
| b/Å                                         | 15.73990(10)                                                                  |
| c/Å                                         | 21.0535(2)                                                                    |
| α/°                                         | 90                                                                            |
| β/°                                         | 112.6080(10)                                                                  |
| γ/°                                         | 90                                                                            |
| Volume/Å <sup>3</sup>                       | 5321.00(9)                                                                    |
| Z                                           | 4                                                                             |
| ρ <sub>calc</sub> /cm <sup>3</sup>          | 1.376                                                                         |
| μ/mm <sup>-1</sup>                          | 1.820                                                                         |
| F(000)                                      | 2304.0                                                                        |
| Crystal size/mm <sup>3</sup>                | 0.002 × 0.002 × 0.001                                                         |
| Radiation                                   | Cu Kα (λ = 1.54184)                                                           |
| 2θ range for data collection/°              | 5.504 to 136.378                                                              |
| Index ranges                                | -19 ≤ h ≤ 20, -17 ≤ k ≤ 18, -25 ≤ l ≤ 23                                      |
| Reflections collected                       | 36668                                                                         |
| Independent reflections                     | 9658 [R <sub>int</sub> = 0.0285, R <sub>sigma</sub> = 0.0220]                 |
| Data/restraints/parameters                  | 9658/0/709                                                                    |
| Goodness-of-fit on F <sup>2</sup>           | 1.050                                                                         |
| Final R indexes [I ≥ 2σ (I)]                | R <sub>1</sub> = 0.0373, wR <sub>2</sub> = 0.1025                             |
| Final R indexes [all data]                  | R <sub>1</sub> = 0.0431, wR <sub>2</sub> = 0.1070                             |
| Largest diff. peak/hole / e Å <sup>-3</sup> | 0.16/-0.23                                                                    |

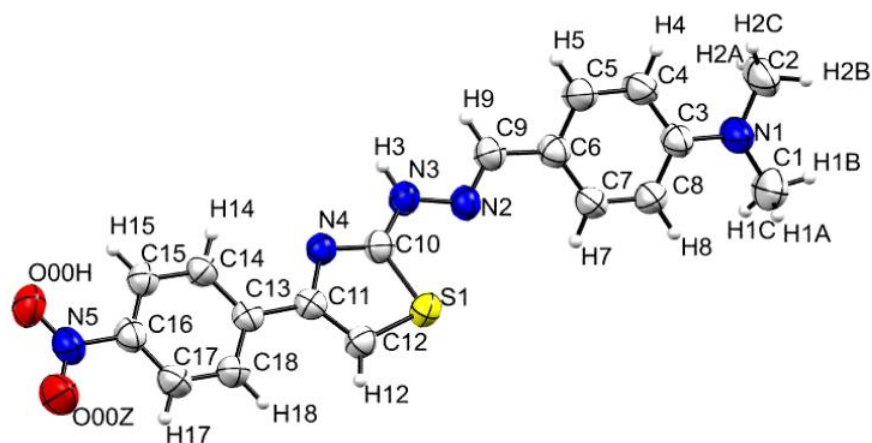

**Table 2. Bond Lengths for 4a**

| Atom | Atom | Length/Å | Atom | Atom | Length/Å |
|------|------|----------|------|------|----------|
|------|------|----------|------|------|----------|

**Table 2. Bond Lengths for 4a**

| Atom | Atom | Length/Å   | Atom | Atom | Length/Å |
|------|------|------------|------|------|----------|
| S1   | C10  | 1.7400(14) | C3   | C4   | 1.391(2) |
| S1   | C12  | 1.7166(15) | C3   | C8   | 1.403(2) |
| N1   | C3   | 1.3803(19) | C5   | C4   | 1.375(2) |
| N1   | C2   | 1.43100(2) | C6   | C9   | 1.453(2) |
| N1   | C1   | 1.44300(2) | C6   | C7   | 1.391(2) |
| N2   | N3   | 1.3777(16) | C6   | C5   | 1.386(2) |
| N2   | C9   | 1.2724(19) | C7   | C8   | 1.373(2) |
| N3   | C10  | 1.3555(19) | C11  | C13  | 1.47118  |
| N4   | C10  | 1.2973(17) | C11  | C12  | 1.355(2) |
| N4   | C11  | 1.3871(17) | C13  | C18  | 1.395(2) |
| N5   | C16  | 1.4565(19) | C13  | C14  | 1.392(2) |
| N5   | O00H | 1.2167(19) | C14  | C15  | 1.380(2) |
| N5   | O00Z | 1.21700(2) | C16  | C15  | 1.379(2) |
|      |      |            | C16  | C17  | 1.383(2) |

**Table 3. Crystal data and structure refinement for 4r**

|                                        |                                                                                              |
|----------------------------------------|----------------------------------------------------------------------------------------------|
| Identification code                    | KSK-SD 33                                                                                    |
| Empirical formula                      | C <sub>32</sub> H <sub>22</sub> Cl <sub>2</sub> N <sub>8</sub> O <sub>4</sub> S <sub>2</sub> |
| Formula weight                         | 718.60                                                                                       |
| Temperature/K                          | 293(2)                                                                                       |
| Crystal system                         | monoclinic                                                                                   |
| Space group                            | P2 <sub>1</sub> /c                                                                           |
| a/Å                                    | 18.3410(2)                                                                                   |
| b/Å                                    | 7.29160(10)                                                                                  |
| c/Å                                    | 25.2962(2)                                                                                   |
| $\alpha$ /°                            | 90                                                                                           |
| $\beta$ /°                             | 106.6970(10)                                                                                 |
| $\gamma$ /°                            | 90                                                                                           |
| Volume/Å <sup>3</sup>                  | 3240.36(6)                                                                                   |
| Z                                      | 4                                                                                            |
| $\rho_{\text{calc}}$ /cm <sup>3</sup>  | 1.473                                                                                        |
| $\mu$ /mm <sup>-1</sup>                | 3.446                                                                                        |
| F(000)                                 | 1476.0                                                                                       |
| Crystal size/mm <sup>3</sup>           | 0.002 × 0.002 × 0.001                                                                        |
| Radiation                              | Cu K $\alpha$ ( $\lambda$ = 1.54184)                                                         |
| 2 $\theta$ range for data collection/° | 5.03 to 136.366                                                                              |
| Index ranges                           | -22 ≤ h ≤ 22, -8 ≤ k ≤ 6, -29 ≤ l ≤ 30                                                       |
| Reflections collected                  | 22215                                                                                        |
| Independent reflections                | 5884 [R <sub>int</sub> = 0.0278, R <sub>sigma</sub> = 0.0225]                                |
| Data/restraints/parameters             | 5884/0/434                                                                                   |

Goodness-of-fit on  $F^2$

1.067

Final R indexes [ $I \geq 2\sigma(I)$ ]

$R_1 = 0.0337$ ,  $wR_2 = 0.0958$

Final R indexes [all data]

$R_1 = 0.0383$ ,  $wR_2 = 0.0992$

Largest diff. peak/hole /  $e \text{ \AA}^{-3}$

0.26/-0.53

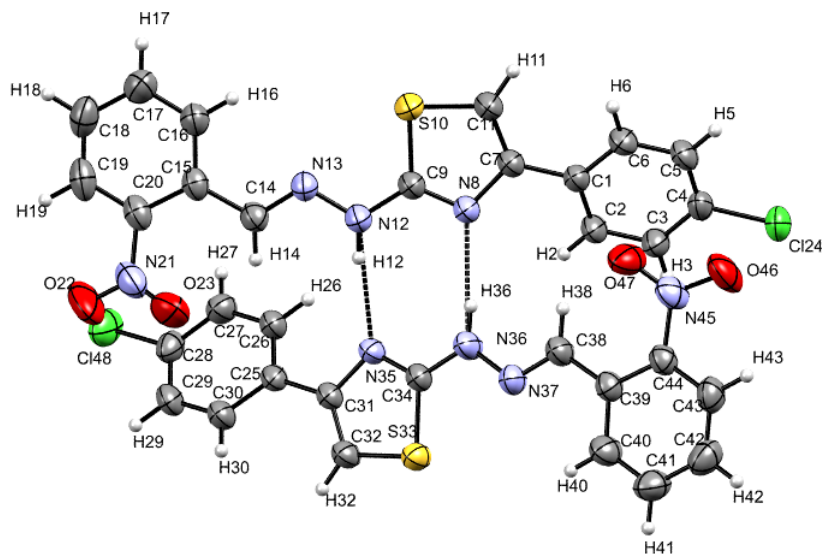

**Table 3. Bond Length for 4r**

| Atom | Atom | Length/ $\text{\AA}$ | Atom | Atom | Length/ $\text{\AA}$ |
|------|------|----------------------|------|------|----------------------|
| Cl24 | C4   | 1.7419(17)           | C1   | C2   | 1.390(3)             |
| S33  | C34  | 1.7225(17)           | C1   | C6   | 1.396(2)             |
| S33  | C32  | 1.7167(17)           | C7   | C11  | 1.354(2)             |
| S10  | C9   | 1.7291(17)           | C31  | C32  | 1.351(2)             |
| S10  | C11  | 1.7208(18)           | C14  | C15  | 1.465(2)             |
| Cl48 | C28  | 1.7431(18)           | C44  | C39  | 1.398(2)             |
| N8   | C7   | 1.396(2)             | C44  | C43  | 1.387(3)             |
| N8   | C9   | 1.302(2)             | C15  | C20  | 1.400(2)             |
| N35  | C31  | 1.393(2)             | C15  | C16  | 1.393(3)             |
| N35  | C34  | 1.298(2)             | C39  | C38  | 1.463(2)             |
| N13  | N12  | 1.360(2)             | C39  | C40  | 1.396(3)             |
| N13  | C14  | 1.278(2)             | C26  | C27  | 1.384(3)             |
| O47  | N45  | 1.223(2)             | C2   | C3   | 1.382(2)             |
| N12  | C9   | 1.363(2)             | C4   | C5   | 1.372(3)             |
| N37  | N36  | 1.360(2)             | C4   | C3   | 1.383(2)             |
| N37  | C38  | 1.272(2)             | C5   | C6   | 1.375(3)             |
| O46  | N45  | 1.223(2)             | C30  | C29  | 1.379(3)             |
| N36  | C34  | 1.365(2)             | C20  | C19  | 1.385(3)             |
| N45  | C44  | 1.465(2)             | C29  | C28  | 1.373(3)             |
| O23  | N21  | 1.222(3)             | C16  | C17  | 1.375(3)             |

| Atom | Atom | Length/Å | Atom | Atom | Length/Å |
|------|------|----------|------|------|----------|
| C25  | C31  | 1.471(2) | C28  | C27  | 1.375(3) |
| C25  | C26  | 1.389(3) | C43  | C42  | 1.367(3) |
| C25  | C30  | 1.393(2) | C19  | C18  | 1.360(3) |
| N21  | C20  | 1.465(3) | C40  | C41  | 1.373(3) |
| N21  | O22  | 1.215(2) | C42  | C41  | 1.381(3) |
| C1   | C7   | 1.472(2) | C18  | C17  | 1.382(3) |

**Table 4. Crystal data and structure refinement for 6c**

|                                             |                                                                  |
|---------------------------------------------|------------------------------------------------------------------|
| Identification code                         | KSKSD10066                                                       |
| Empirical formula                           | C <sub>17</sub> H <sub>13</sub> Br <sub>2</sub> N <sub>3</sub> S |
| Formula weight                              | 451.18                                                           |
| Temperature/K                               | 298                                                              |
| Crystal system                              | monoclinic                                                       |
| Space group                                 | P2 <sub>1</sub> /c                                               |
| a/Å                                         | 9.61780(10)                                                      |
| b/Å                                         | 12.12040(10)                                                     |
| c/Å                                         | 14.86240(10)                                                     |
| α/°                                         | 90                                                               |
| β/°                                         | 99.5390(10)                                                      |
| γ/°                                         | 90                                                               |
| Volume/Å <sup>3</sup>                       | 1708.58(3)                                                       |
| Z                                           | 4                                                                |
| ρ <sub>calc</sub> /cm <sup>3</sup>          | 1.754                                                            |
| μ/mm <sup>-1</sup>                          | 7.170                                                            |
| F(000)                                      | 888.0                                                            |
| Crystal size/mm <sup>3</sup>                | 0.002 × 0.002 × 0.001                                            |
| Radiation                                   | Cu Kα (λ = 1.54184)                                              |
| 2θ range for data collection/°              | 9.324 to 136.402                                                 |
| Index ranges                                | -10 ≤ h ≤ 11, -14 ≤ k ≤ 14, -17 ≤ l ≤ 17                         |
| Reflections collected                       | 16387                                                            |
| Independent reflections                     | 3078 [R <sub>int</sub> = 0.0276, R <sub>sigma</sub> = 0.0199]    |
| Data/restraints/parameters                  | 3078/0/209                                                       |
| Goodness-of-fit on F <sup>2</sup>           | 1.050                                                            |
| Final R indexes [I >= 2σ (I)]               | R <sub>1</sub> = 0.0330, wR <sub>2</sub> = 0.0849                |
| Final R indexes [all data]                  | R <sub>1</sub> = 0.0355, wR <sub>2</sub> = 0.0864                |
| Largest diff. peak/hole / e Å <sup>-3</sup> | 0.78/-0.77                                                       |

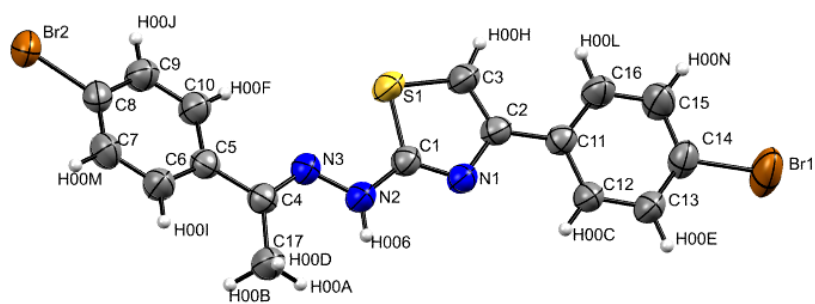

**Table 5. Bond Lengths for 6c**

| Atom | Atom | Length/Å | Atom | Atom | Length/Å |
|------|------|----------|------|------|----------|
| Br2  | C8   | 1.899(3) | C5   | C6   | 1.389(4) |
| Br1  | C14  | 1.901(3) | C11  | C12  | 1.386(4) |
| S1   | C1   | 1.725(3) | C11  | C16  | 1.392(4) |
| S1   | C3   | 1.720(3) | C4   | C17  | 1.500(4) |
| N1   | C2   | 1.392(3) | C12  | C13  | 1.387(4) |
| N1   | C1   | 1.295(3) | C8   | C9   | 1.379(4) |
| N3   | N2   | 1.363(3) | C8   | C7   | 1.366(4) |
| N3   | C4   | 1.287(3) | C13  | C14  | 1.367(4) |
| N2   | C1   | 1.367(3) | C10  | C9   | 1.371(4) |
| C2   | C11  | 1.466(4) | C14  | C15  | 1.379(5) |
| C2   | C3   | 1.354(4) | C6   | C7   | 1.388(4) |
| C5   | C4   | 1.477(4) | C16  | C15  | 1.371(5) |
| C5   | C10  | 1.393(4) |      |      |          |
